# Supplementary material for: Harnessing the 1,3-azadiene-anhydride reaction for the regioselective and stereocontrolled synthesis of lactam-fused bromotetrahydropyrans by bromoetherification of lactam-tethered trisubstituted tertiary alkenols
Source: Royal Society of Chemistry journal article supplement (doi:10.1039/d4ra02523g), 2024-01-01
Supplement: d4ra02523g1.pdf [file d4ra02523g1.pdf]

Supporting Information for:

Harnessing the 1,3-azadiene-anhydride reaction for the regioselective and stereocontrolled synthesis of lactam-fused bromotetrahydropyrans by bromoetherification of lactam-tethered trisubstituted tertiary alkenols

*Ifeyinwa S. Anosike and Timothy K. Beng\**

*Department of Chemistry, Central Washington University,  
Ellensburg, WA 98926, USA  
[Timothy.beng@cwu.edu](mailto:Timothy.beng@cwu.edu)*

*Contents:*

|                                                         |     |
|---------------------------------------------------------|-----|
| 1. General Experimental Information and Procedures..... | S2  |
| 2. Scheme 1 Results .....                               | S3  |
| 3. Scheme 2 Results .....                               | S91 |
| 4. References .....                                     | S93 |

## 2. Experimental Section

All experiments involving air and moisture-sensitive reagents were carried out under an inert atmosphere of nitrogen and using freshly distilled solvents. Freshly purchased toluene and DMF were stored under 4 Å molecular sieves for several days prior to use. THF and 2-MeTHF were distilled from sodium benzophenone ketyl. All other solvents were used as purchased. All amines, enals, Grignard reagents, and N-bromosuccinimide were newly purchased and used without further purification. Column chromatography was performed on silica gel (230-400 mesh). Thin-layer chromatography (TLC) was performed using Silicycle Siliplate™ glass backed plates (250 µm thickness, 60 Å porosity, F-254 indicator) and visualized using UV (254 nm). Unless otherwise indicated, NMR spectral data were acquired using CDCl<sub>3</sub> as solvent, at room temperature. Chemical shifts are quoted in parts per million (ppm). HRMS-EI<sup>+</sup> data were obtained using either electron spray ionization (ESI) or electron impact (EI) techniques. High-resolution ESI was obtained on an LTQ-FT (ion trap; analyzed using Excalibur). High resolution EI was obtained on an Autospec (magnetic sector; analyzed using MassLynx). The alkenols were prepared using reported procedures.<sup>1,2</sup>

**General Procedure A: Bromoetherification of lactam-tethered alkenol 1:** An oven-dried vial was equipped with a stir bar and a solution of **1** (1.00 mmol) in dichloromethane (5 mL) was added to the vial followed by deionized water (1 mL) and N-bromosuccinimide (1.10 mmol, 1.1 equiv) at room temperature. After stirring for 3 days at the same temperature, the reaction mixture diluted by the addition of dichloromethane (20 mL) and quenched by the addition of saturated sodium thiosulfate solution (10 mL). The layers were separated and the aqueous layer was extracted with dichloromethane (20 mL). The combined organic layers were washed with brine (20 mL), dried over anhydrous sodium sulfate, and concentrated *in vacuo*. The residue was purified by flash column chromatography to afford the lactam-fused bromotetrahydropyran.

**Typical Procedure A:** To a solution of alkenol **1a** (349.5 mg, 1.00 mmol) in dichloromethane (10 mL) was added N-bromosuccinimide (195.8 mg, 1.10 mmol) at room temperature. After stirring for 3 days at the same temperature, the reaction mixture diluted by the addition of dichloromethane (20 mL) and quenched by the addition of saturated sodium thiosulfate solution (10 mL). The layers were separated and the aqueous layer was extracted with dichloromethane (20 mL). The combined organic layers were washed with brine (20 mL), dried over anhydrous sodium sulfate, and

concentrated *in vacuo*. The residue was purified by flash column chromatography as indicated below to afford **4a** in 93% yield and 95:5 dr.

## Scheme 1 Results

### Compound 4a

Prepared in 1.0 mmol scale using **General Procedure A**. Purification: Flash chromatography on silica eluting with hexane/acetone (90:10 to 70:30). Yellowish oil. Yield = 398.4 mg, 93%, 95:5 dr (*anti:syn*).  $^1\text{H}$  NMR (400 MHz,  $\text{CDCl}_3$ )  $\delta$  7.48 – 7.39 (m, 2H), 7.39 – 7.14 (m, 8H), 5.04 (d,  $J$  = 15.7 Hz, 1H), 4.89 (s, 1H), 4.73 (d,  $J$  = 15.7 Hz, 1H), 4.19 (d,  $J$  = 10.8 Hz, 1H), 2.51 – 2.30 (m, 2H), 2.19 – 2.08 (m, 1H), 1.47 (s, 3H), 1.33 (s,s, 6H).  $^{13}\text{C}$  NMR (101 MHz,  $\text{CDCl}_3$ )  $\delta$  175.66, 137.38, 136.01, 129.75, 128.36, 128.33, 127.81, 127.34, 126.98, 80.52, 74.89, 68.08, 67.67, 47.62, 45.20, 33.24, 29.37, 18.19, 17.83. **HRMS-EI<sup>+</sup>** ( $m/z$ ): calc for  $\text{C}_{23}\text{H}_{26}\text{BrNO}_2$  [ $\text{M}$ ]<sup>+</sup> 427.1147, found 427.1153. FTIR (KBr): 2965.4, 1727.5, 1696.3, 1604.9, 1511.0, 1448.5, 1414.7, 1384.9, 1357.4, 1298.7, 1247.5, 1179.3, 1135.9, 1031.8, 905.8, 839.0.

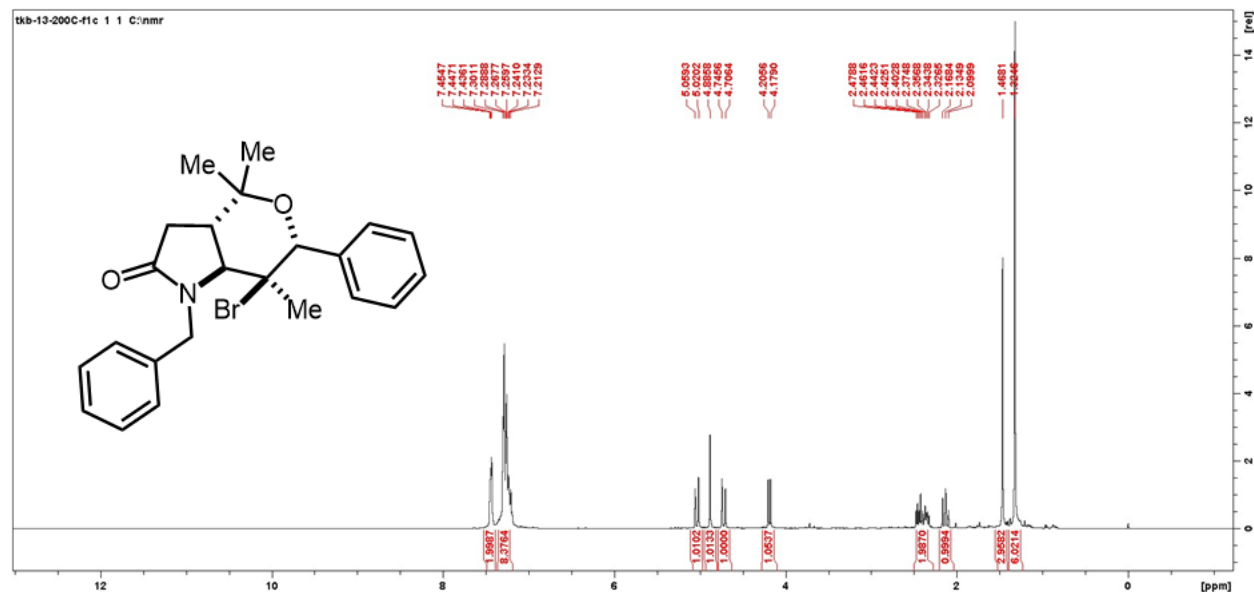

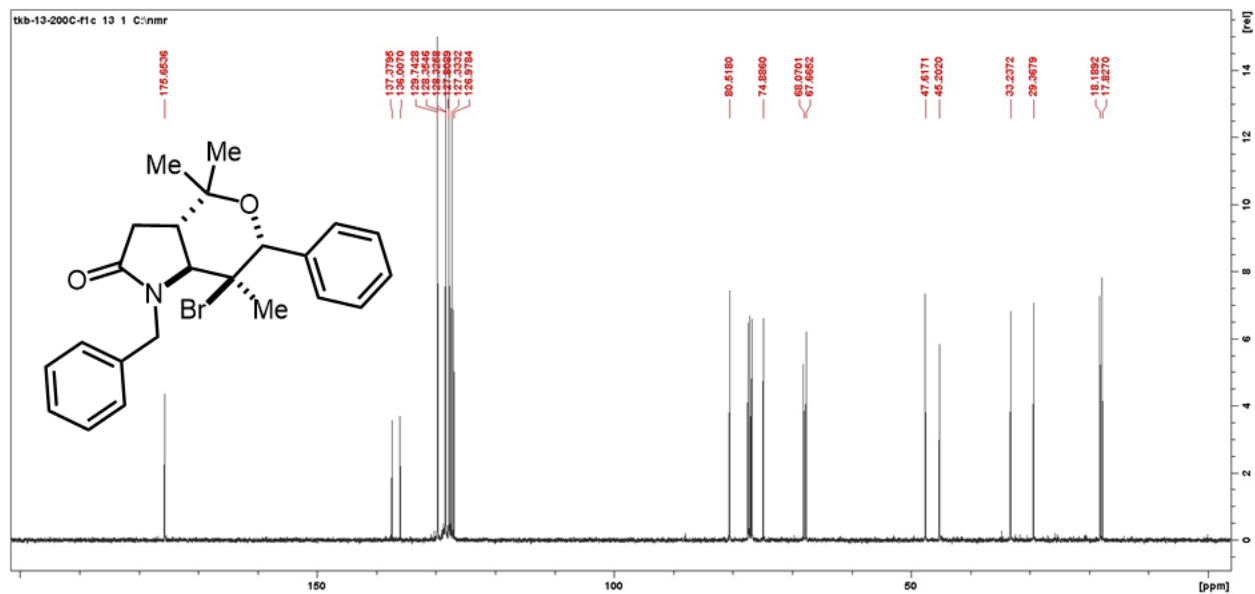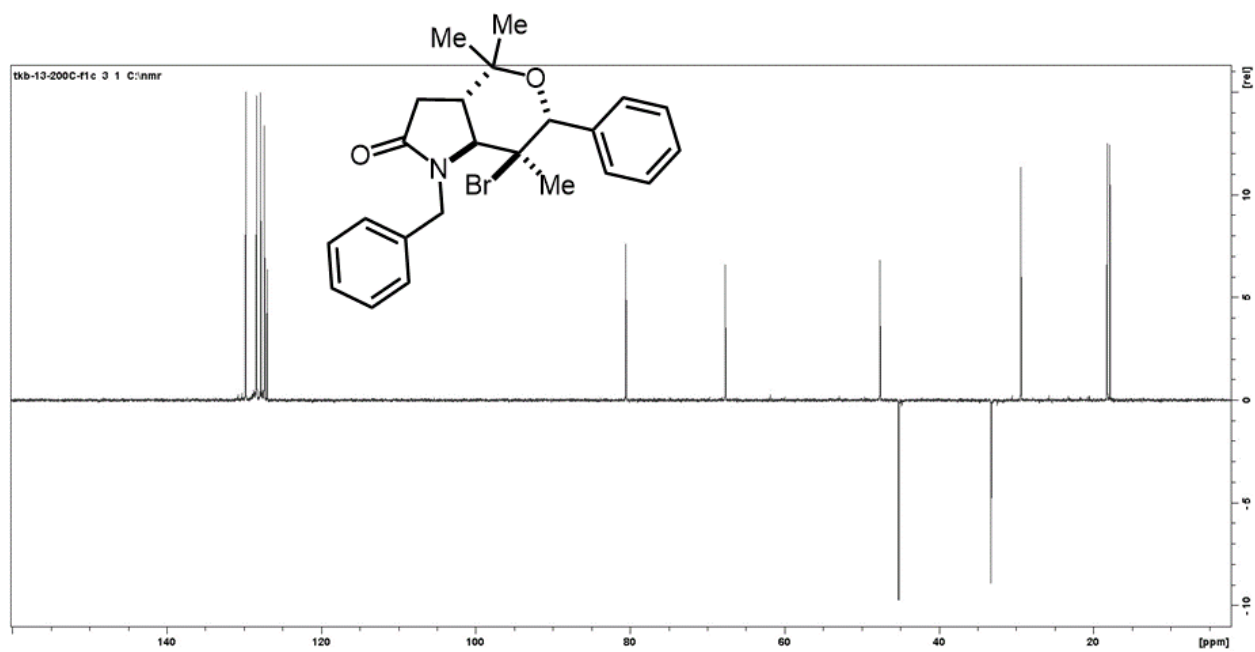

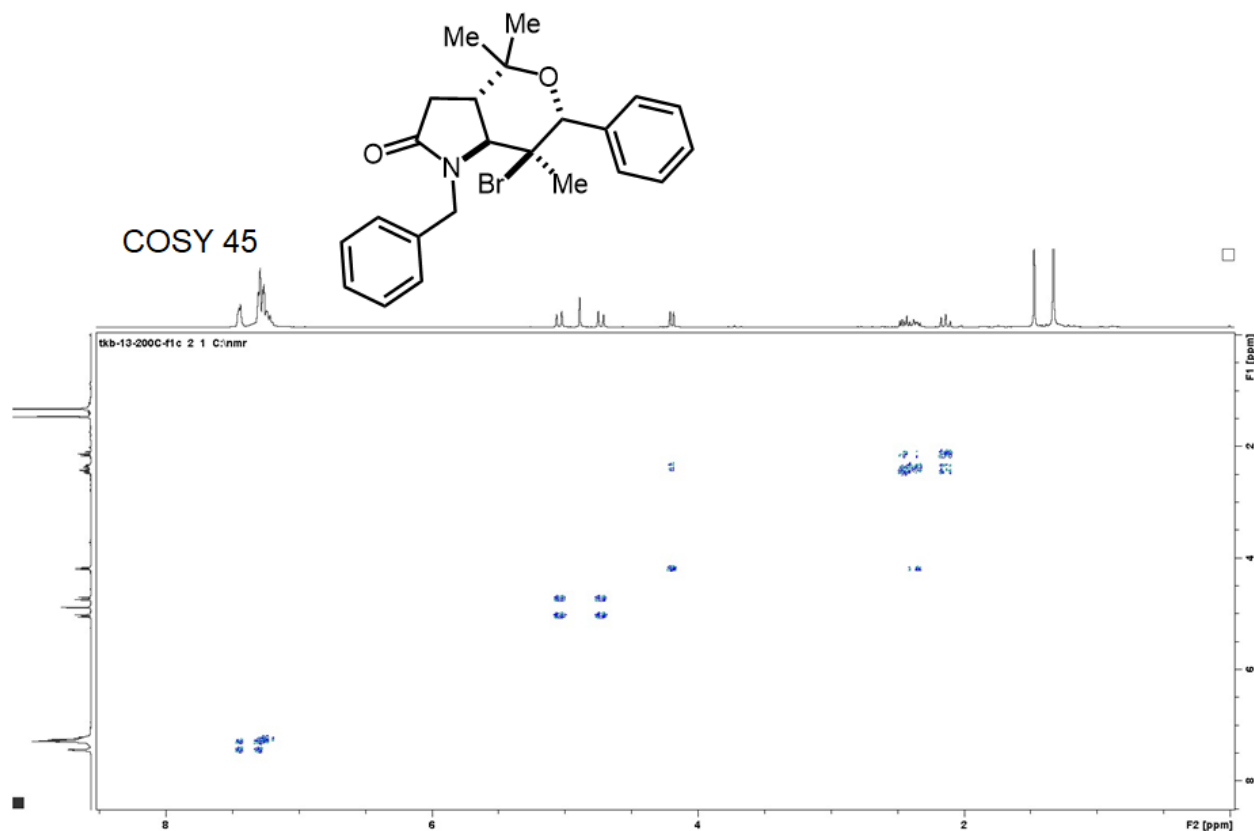

### Compound 4b

Prepared in 1.0 mmol scale using **General Procedure A**. Purification: Flash chromatography on silica eluting with hexane/acetone (90:10 to 70:30). Yellowish oil. Yield = 416.5 mg, 90%, 95:5 dr (*anti:syn*). <sup>1</sup>H NMR (400 MHz, CDCl<sub>3</sub>) δ 7.44 (dt, J = 5.9, 3.5 Hz, 2H), 7.38 – 7.18 (m, 7H), 4.98 (d, J = 15.7 Hz, 1H), 4.89 (s, 1H), 4.70 (d, J = 15.7 Hz, 1H), 4.16 (d, J = 10.7 Hz, 1H), 2.51 – 2.30 (m, 2H), 2.18 – 2.06 (m, 1H), 1.46 (s, 3H), 1.34 (s, 6H). <sup>13</sup>C NMR (101 MHz, CDCl<sub>3</sub>) δ 175.70, 136.01, 135.85, 132.84, 129.70, 129.38, 128.50, 128.37, 127.35, 80.50, 74.87, 68.20, 67.77, 47.60, 44.64, 33.17, 29.32, 18.22, 17.79. **HRMS-EI<sup>+</sup>** (*m/z*): calc for C<sub>23</sub>H<sub>25</sub>BrClNO<sub>2</sub> [M]<sup>+</sup> 461.0757, found 461.0761. FTIR (KBr): 2985.4, 1737.5, 1691.2, 1644.9, 1511.0, 1448.5, 1414.7, 1384.9, 1357.4, 1298.7, 1247.5, 1179.3, 1002.8, 925.8, 791.0.

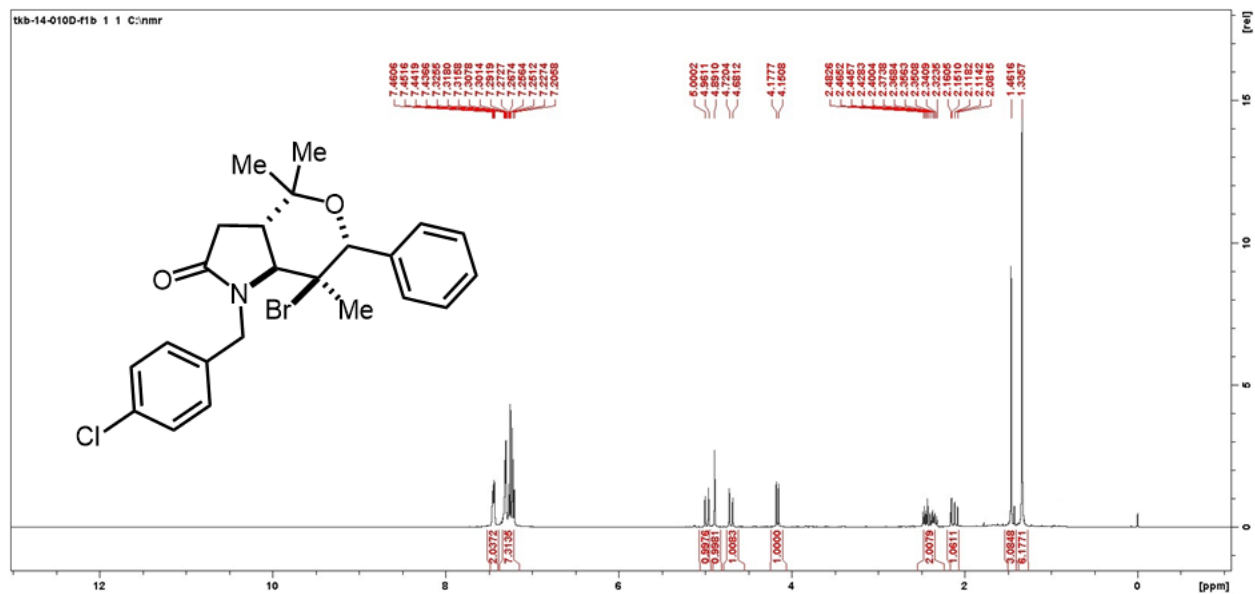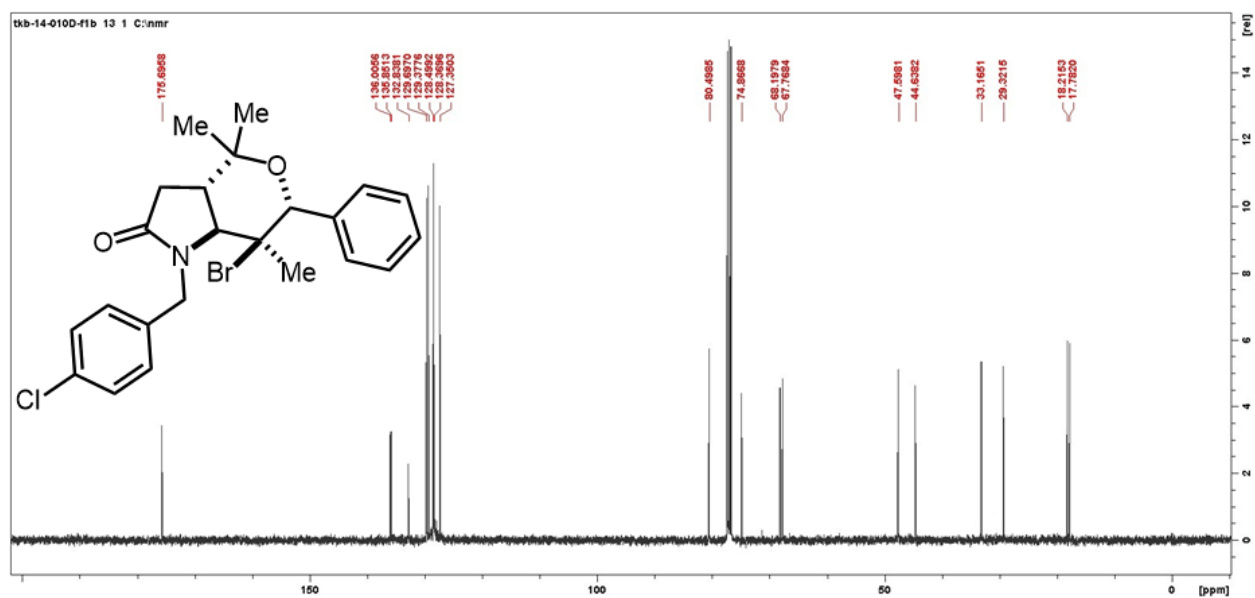

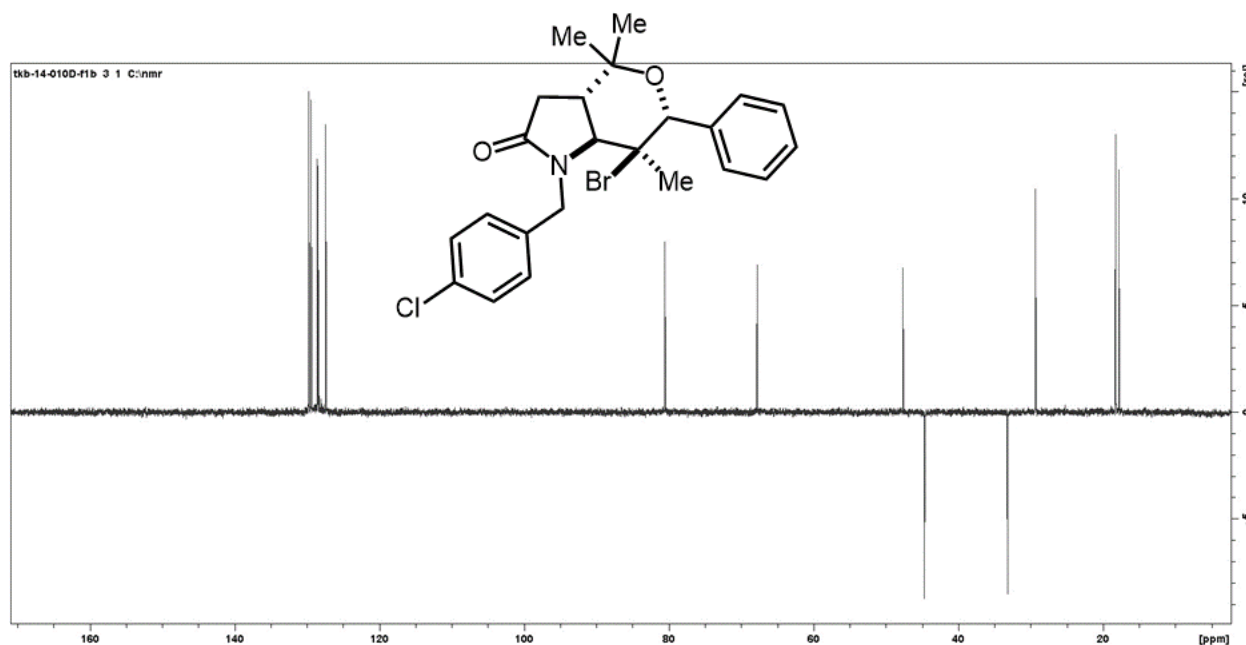

### Compound 4c

Prepared in 1.0 mmol scale using **General Procedure A**. Purification: Flash chromatography on silica eluting with hexane/acetone (90:10 to 70:30). Amorphous solid. Yield = 420.3 mg, 95%, 95:5 dr (*anti:syn*).  $^1\text{H}$  NMR (400 MHz,  $\text{CDCl}_3$ )  $\delta$  7.45 (q,  $J = 3.0$  Hz, 2H), 7.30 (dd,  $J = 4.6, 2.4$  Hz, 3H), 7.19 – 7.12 (m, 2H), 7.09 (d,  $J = 7.8$  Hz, 2H), 5.00 (d,  $J = 15.6$  Hz, 1H), 4.89 (s, 1H), 4.68 (d,  $J = 15.6$  Hz, 1H), 4.22 – 4.11 (m, 1H), 2.49 – 2.26 (m, 5H), 2.18 – 2.07 (m, 1H), 1.47 (s, 3H), 1.33 (s, 6H).  $^{13}\text{C}$  NMR (101 MHz,  $\text{CDCl}_3$ )  $\delta$  175.61, 136.47, 135.98, 134.25, 130.21, 129.70, 129.37, 128.99, 128.27, 127.90, 127.77, 127.67, 127.28, 80.47, 74.84, 68.05, 67.53, 47.55, 44.86, 33.23, 29.32, 21.09, 18.17, 17.77. **HRMS-EI $^+$**  ( $m/z$ ): calc for  $\text{C}_{24}\text{H}_{28}\text{BrNO}_2$  [ $\text{M}$ ] $^+$  441.1303, found 441.1300. FTIR (KBr): 2939.4, 1723.5, 1696.3, 1604.9, 1511.0, 1448.5, 1414.7, 1384.9, 1357.4, 1298.7, 1247.5, 1179.3, 1135.9, 1031.8, 985.8, 833.0.

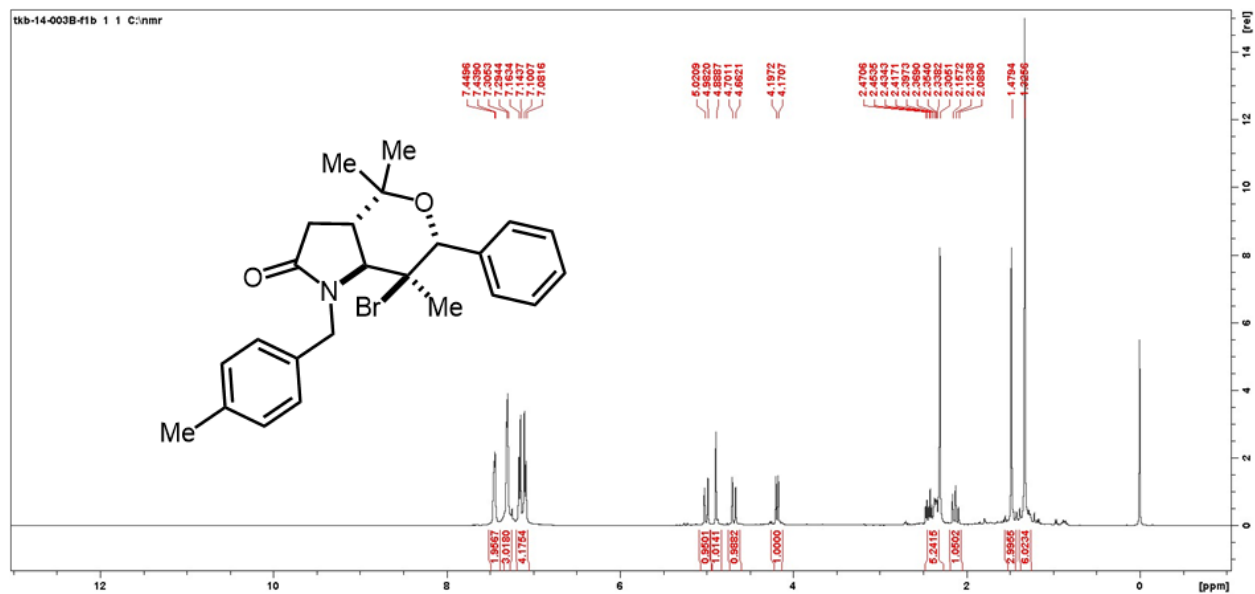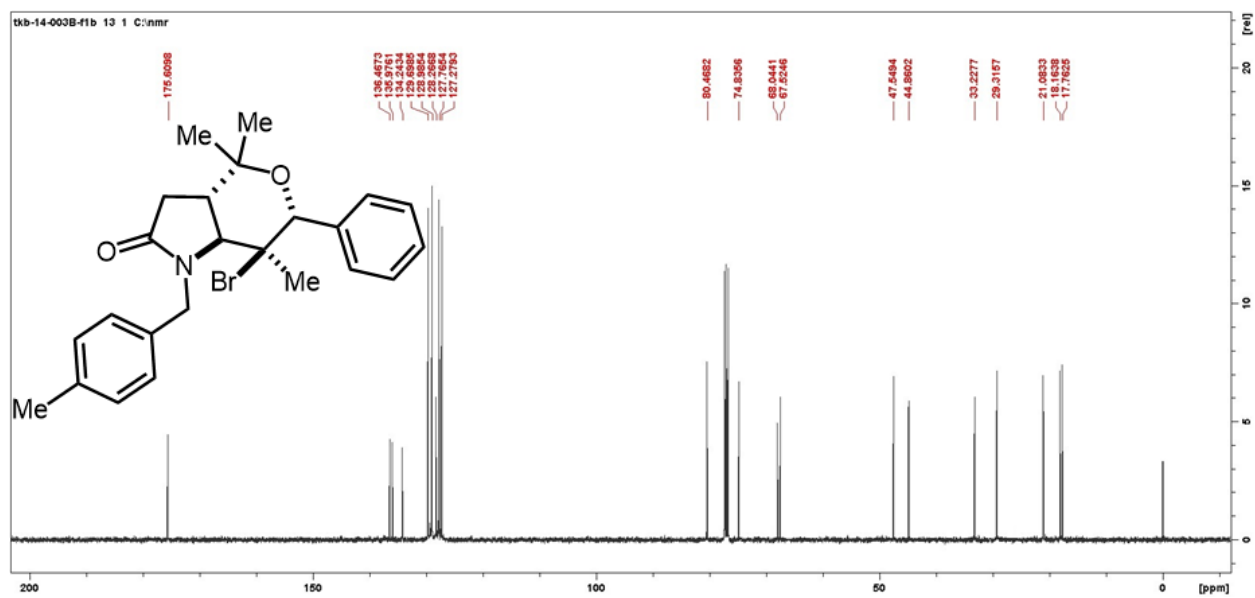



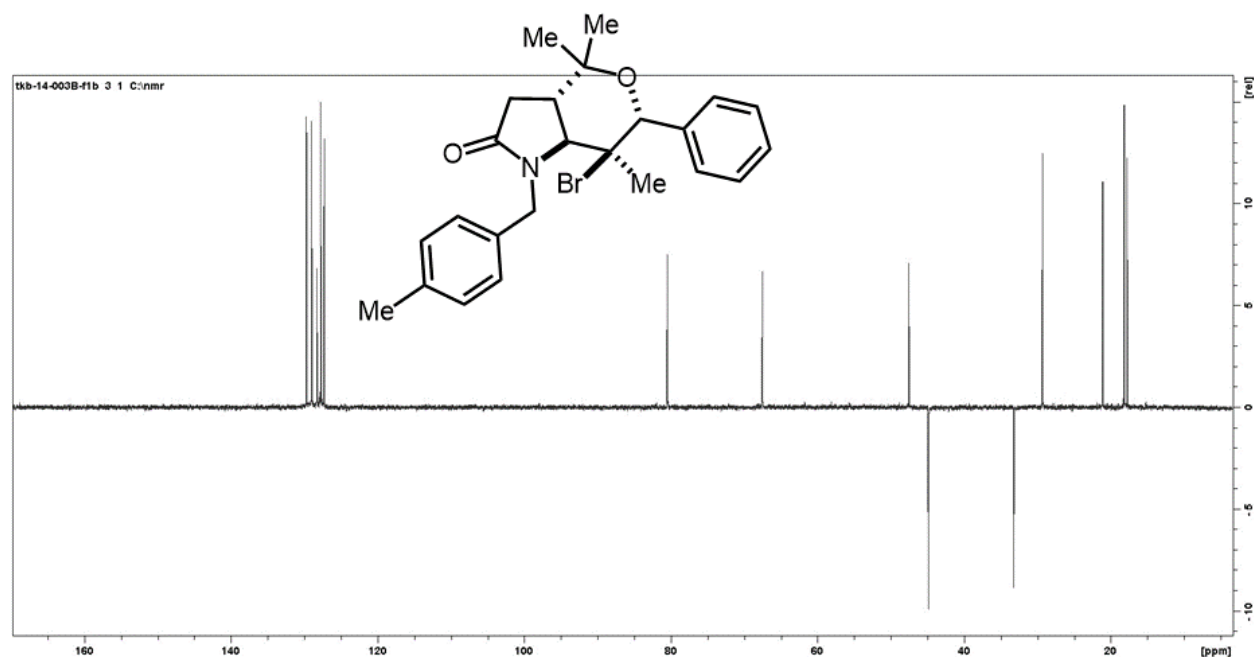

### Compound 4d

Prepared in 1.0 mmol scale using **General Procedure A**. Purification: Flash chromatography on silica eluting with hexane/acetone (90:10 to 50:50). Amorphous solid. Yield = 427.8 mg, 88%, 95:5 dr (*anti:syn*).  $^1\text{H}$  NMR (400 MHz,  $\text{CDCl}_3$ )  $\delta$  7.52 (s, 1H), 7.46 (q,  $J = 2.9$  Hz, 2H), 7.32 (dd,  $J = 4.6, 2.4$  Hz, 3H), 7.28 – 7.19 (m, 2H), 6.81 (d,  $J = 7.5$  Hz, 1H), 4.91 (t,  $J = 7.7$  Hz, 2H), 4.68 (d,  $J = 15.4$  Hz, 1H), 4.17 (d,  $J = 10.7$  Hz, 1H), 3.86 (s, 3H), 2.52 – 2.30 (m, 2H), 2.19 – 2.05 (m, 1H), 1.46 (s, 3H), 1.34 (s, 6H).  $^{13}\text{C}$  NMR (101 MHz,  $\text{CDCl}_3$ )  $\delta$  175.70, 154.96, 135.91, 133.09, 131.28, 129.73, 128.40, 128.38, 127.36, 111.65, 80.53, 74.89, 68.35, 67.87, 56.23, 47.59, 44.13, 33.19, 29.33, 18.25, 17.80. **HRMS-EI $^+$**  ( $m/z$ ): calc for  $\text{C}_{24}\text{H}_{27}\text{Br}_2\text{NO}_3$   $[\text{M}]^+$  535.0358, found 535.0362. FTIR (KBr): 2984.1, 1733.5, 1654.3, 1606.9, 1511.0, 1448.5, 1414.7, 1384.9, 1357.4, 1299.7, 1242.5, 1179.3, , 1031.8, 994.9, 823.7, 735.2.

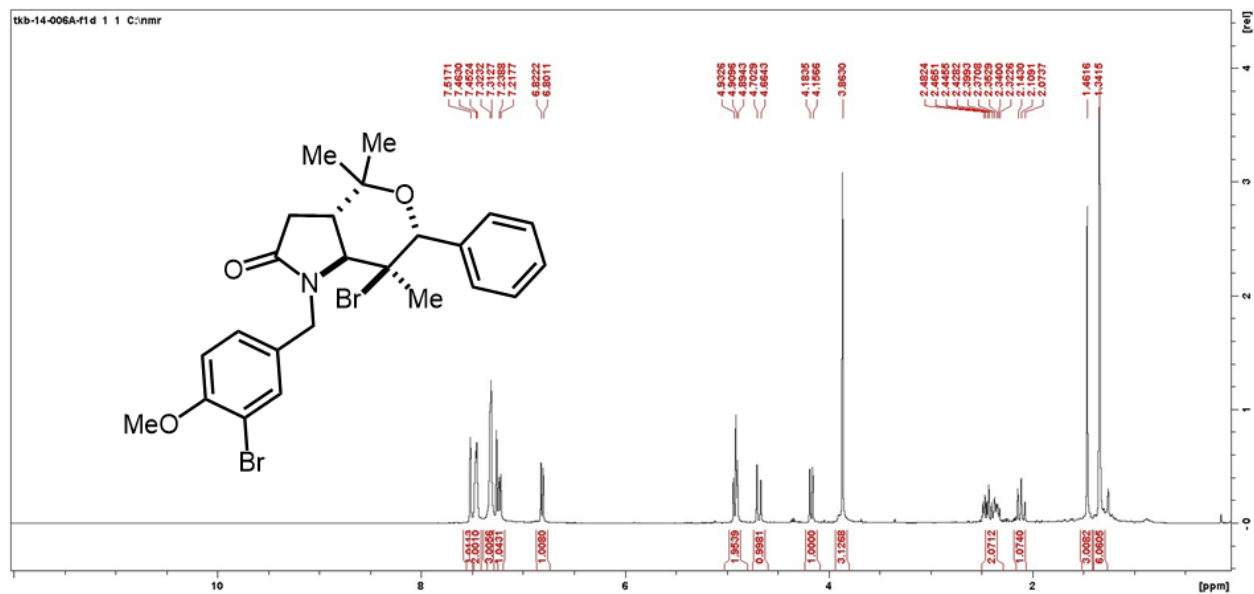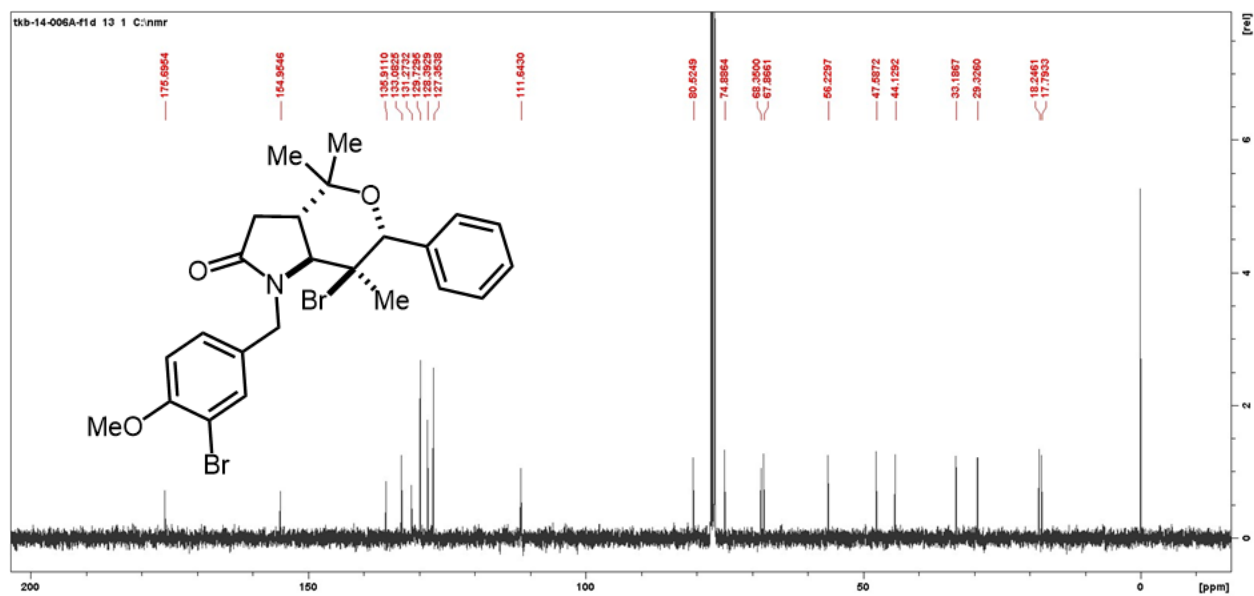

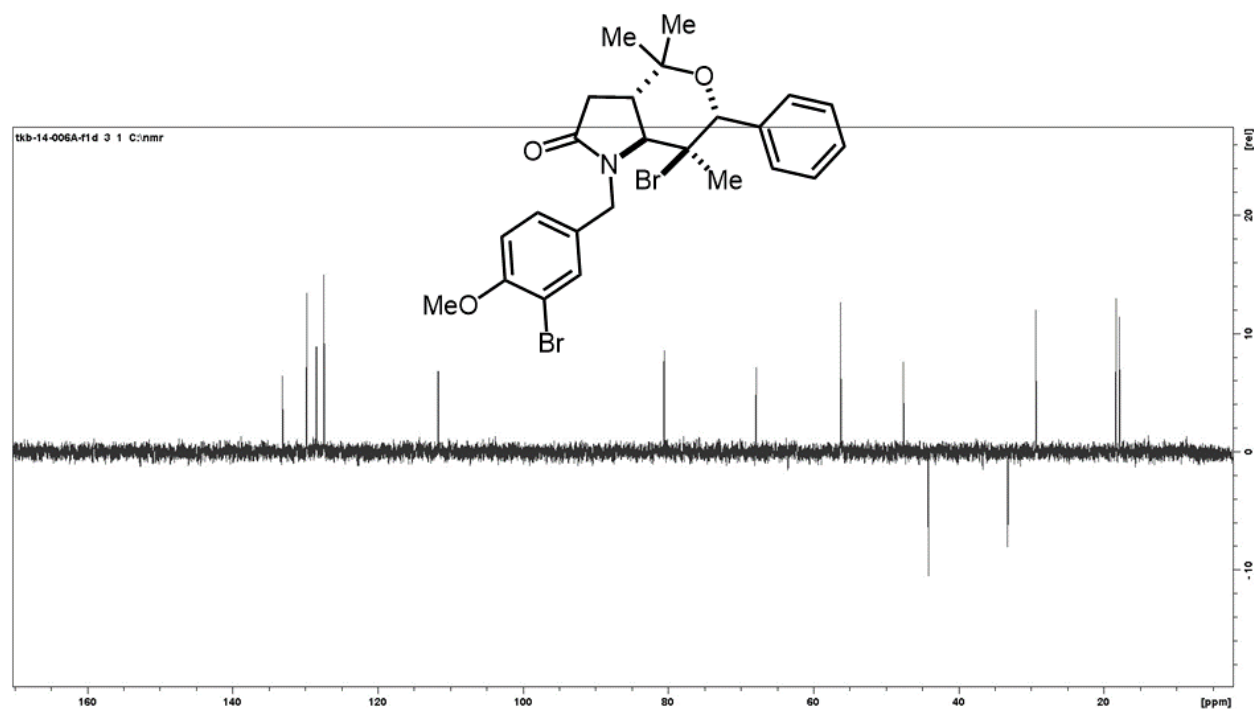

### Compound 4e

Prepared in 1.0 mmol scale using **General Procedure A**. Purification: Flash chromatography on silica eluting with hexane/acetone (90:10 to 50:50). Amorphous solid. Yield = 482.2 mg, 85%, 95:5 dr (*anti:syn*).  $^1\text{H}$  NMR (400 MHz,  $\text{CDCl}_3$ )  $\delta$  7.35 – 7.20 (m, 6H), 6.50 (s, 1H), 4.94 (d,  $J$  = 15.4 Hz, 1H), 4.85 (s, 1H), 4.39 (d,  $J$  = 15.4 Hz, 1H), 4.25 (d,  $J$  = 8.1 Hz, 1H), 3.92 – 3.85 (m, 6H), 2.71 – 2.64 (m, 1H), 2.55 – 2.31 (m, 2H), 1.40 (s, 3H), 1.36 (s, 3H), 1.24 (s, 3H).  $^{13}\text{C}$  NMR (101 MHz,  $\text{CDCl}_3$ )  $\delta$  175.62, 157.68, 156.10, 137.67, 132.16, 130.19, 128.29, 127.67, 118.16, 102.12, 96.71, 87.91, 81.13, 69.64, 61.62, 56.51, 55.79, 48.93, 39.62, 32.44, 30.48, 25.71, 21.13. **HRMS- $\text{EI}^+$**  ( $m/z$ ): calc for  $\text{C}_{25}\text{H}_{29}\text{Br}_2\text{NO}_4$   $[\text{M}]^+$  565.0463, found 565.0468. FTIR (KBr): 2994.1, 1763.4, 1669.4, 1608.2, 1511.1, 1431.8, 1414.7, 1344.9, 1298.4, 1135.3, 1031.8, 996.7, 706.4.

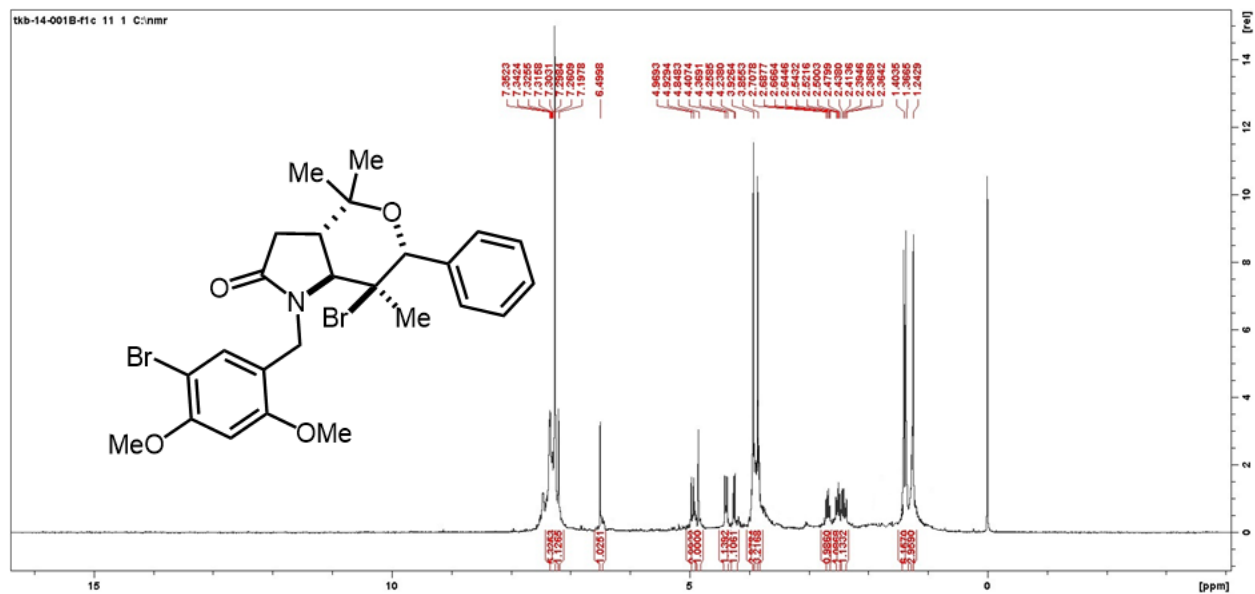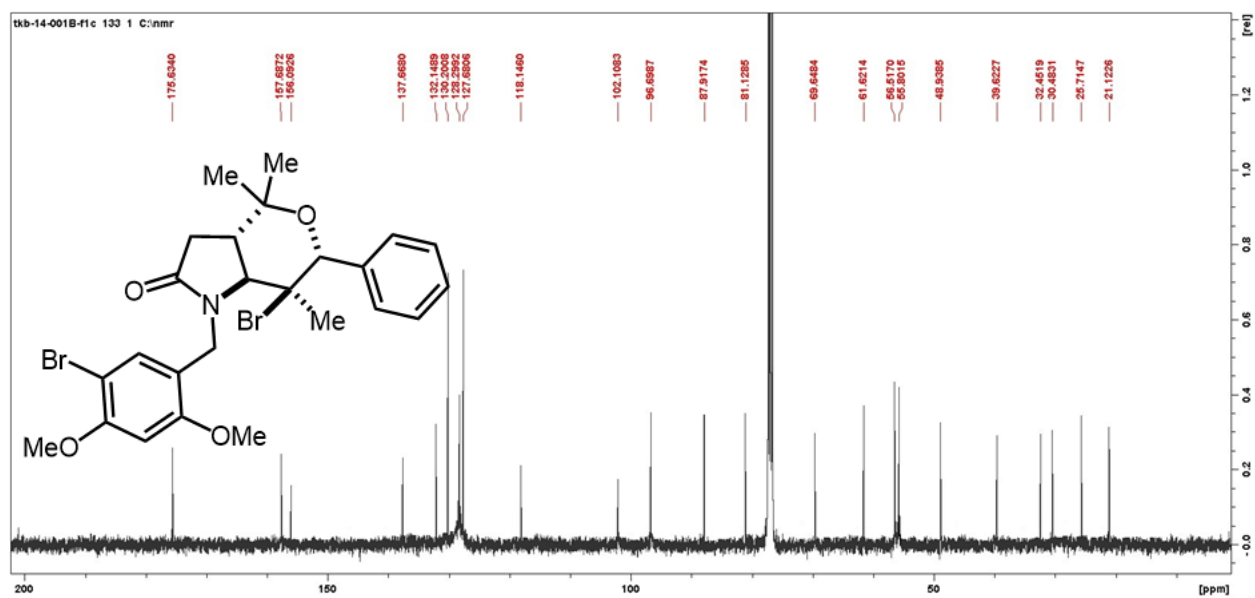

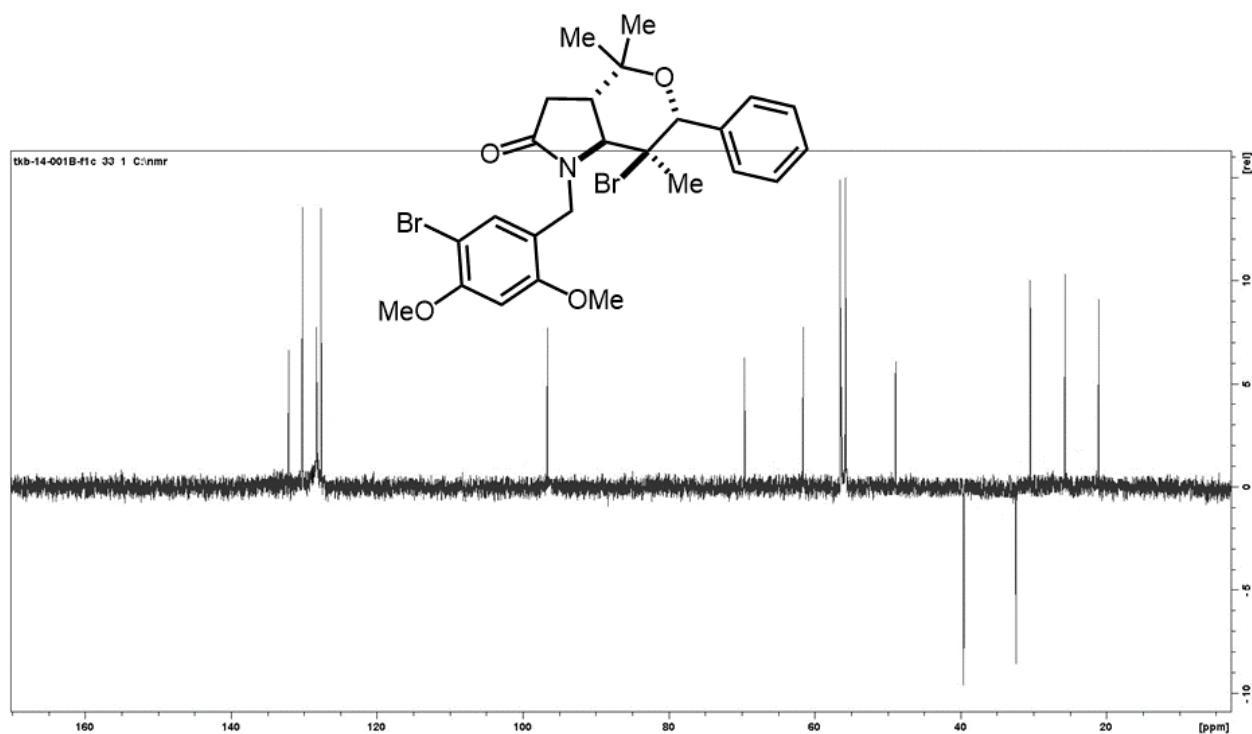

### Compound 4f

Prepared in 1.0 mmol scale using **General Procedure A**. Purification: Flash chromatography on silica eluting with hexane/acetone (90:10 to 70:30). Amorphous solid. Yield = 349.9 mg, 92%, 95:5 dr (*anti:syn*). <sup>1</sup>H NMR (400 MHz, CDCl<sub>3</sub>) δ 7.51 (dq, J = 8.3, 2.8 Hz, 2H), 7.43 – 7.28 (m, 3H), 4.99 (s, 1H), 4.36 (hept, J = 6.6 Hz, 1H), 4.09 (d, J = 11.6 Hz, 1H), 2.28 – 2.15 (m, 2H), 1.98 – 1.85 (m, 1H), 1.61 – 1.56 (m, 6H), 1.31 – 1.28 (m, 9H). <sup>13</sup>C NMR (101 MHz, CDCl<sub>3</sub>) δ 175.29, 136.11, 129.92, 128.33, 127.37, 80.51, 74.65, 69.24, 67.46, 48.01, 46.26, 34.20, 29.23, 20.56, 17.93, 17.77, 16.64. **HRMS-EI<sup>+</sup>** (*m/z*): calc for C<sub>19</sub>H<sub>26</sub>BrNO<sub>2</sub> [M]<sup>+</sup> 379.1147, found 379.1153.

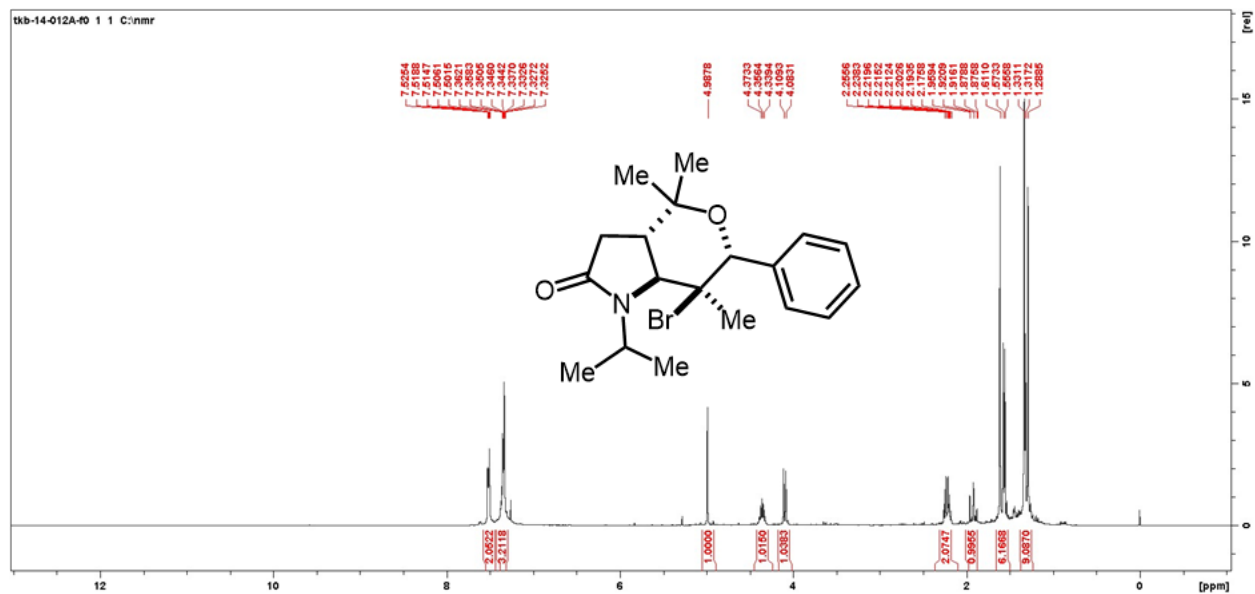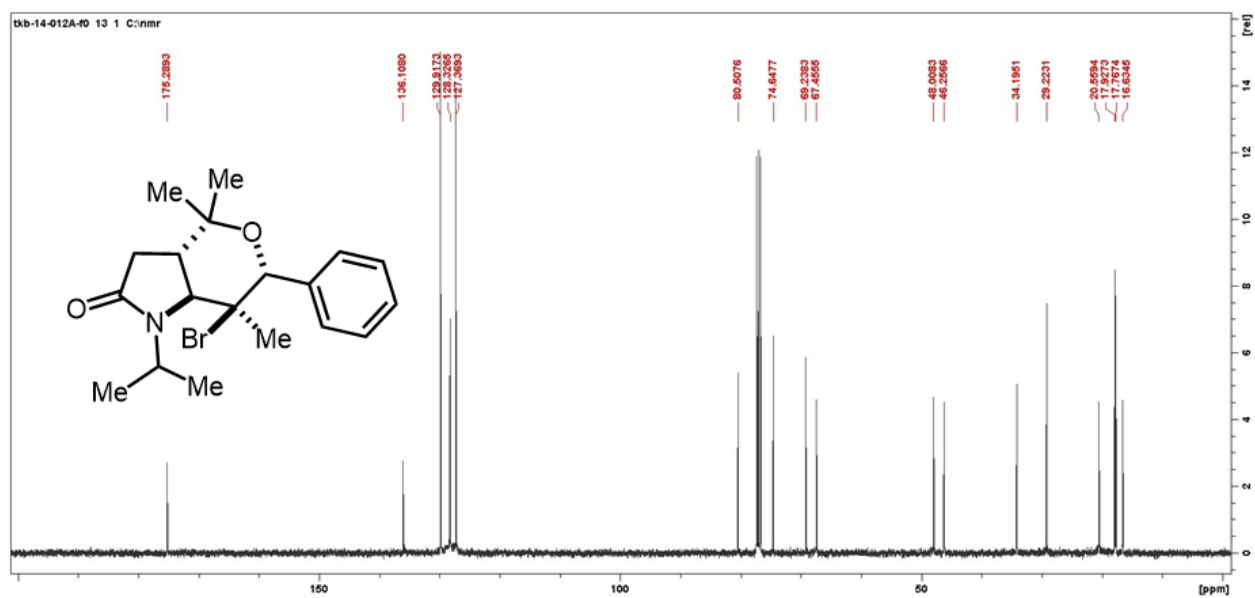

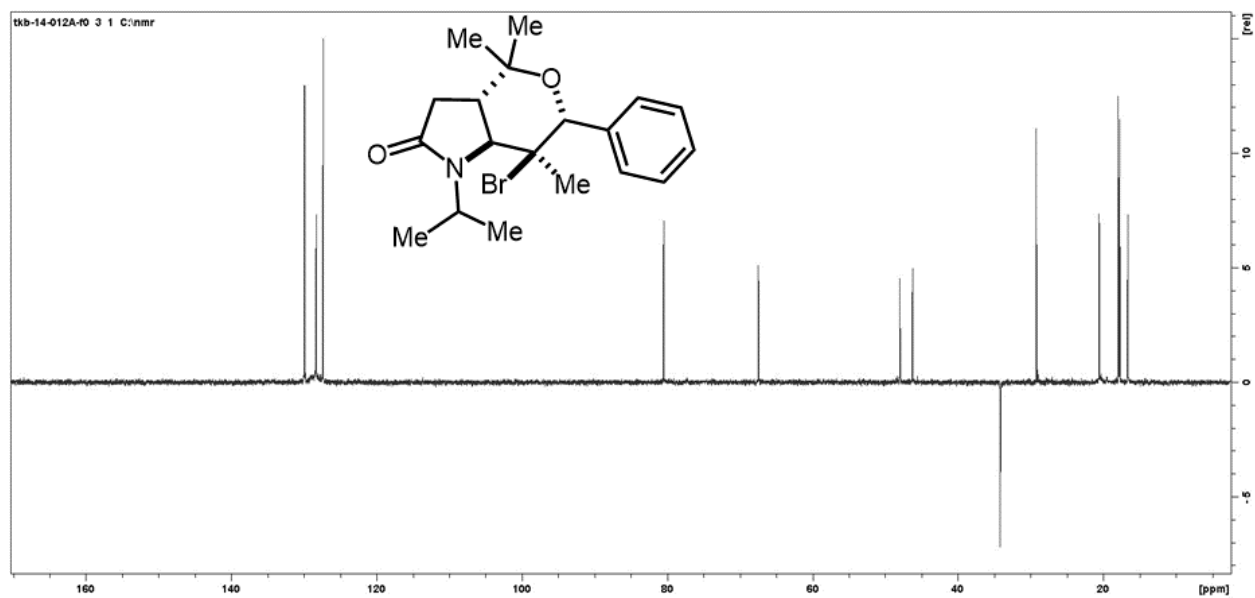

COSY 45

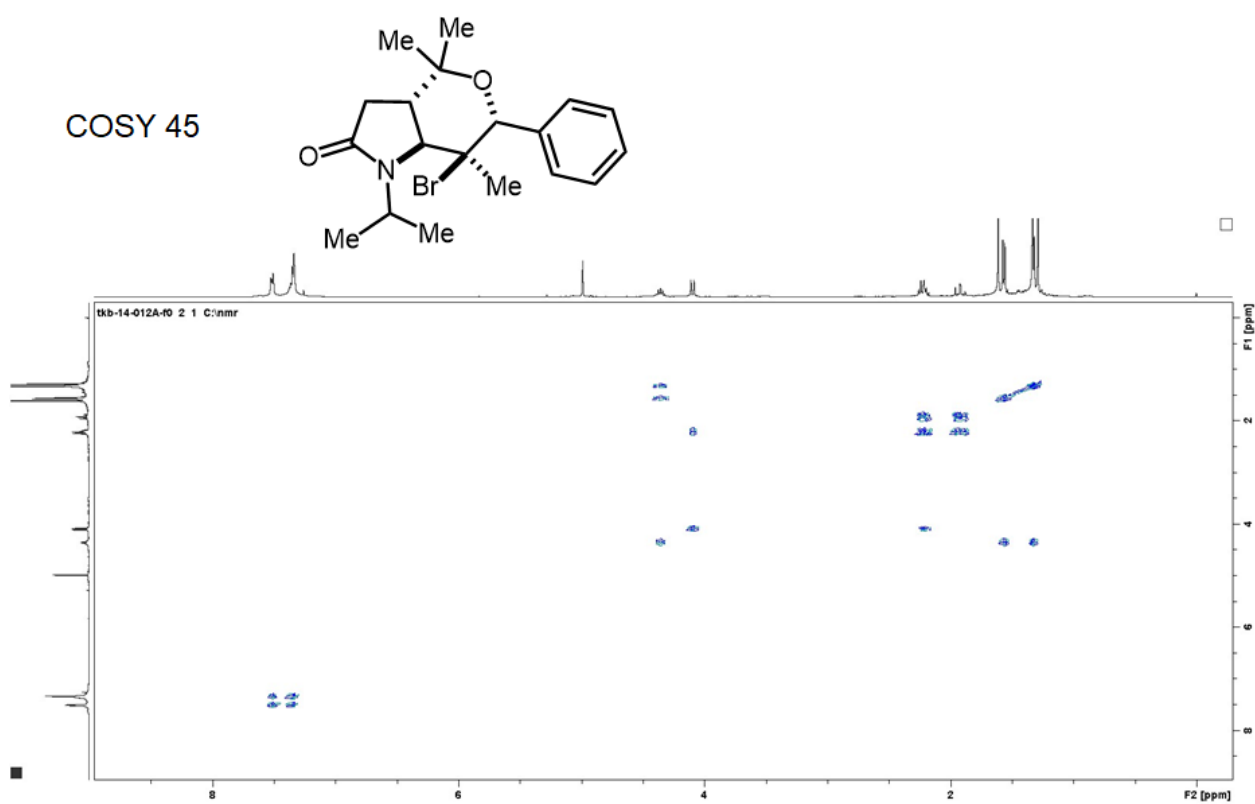

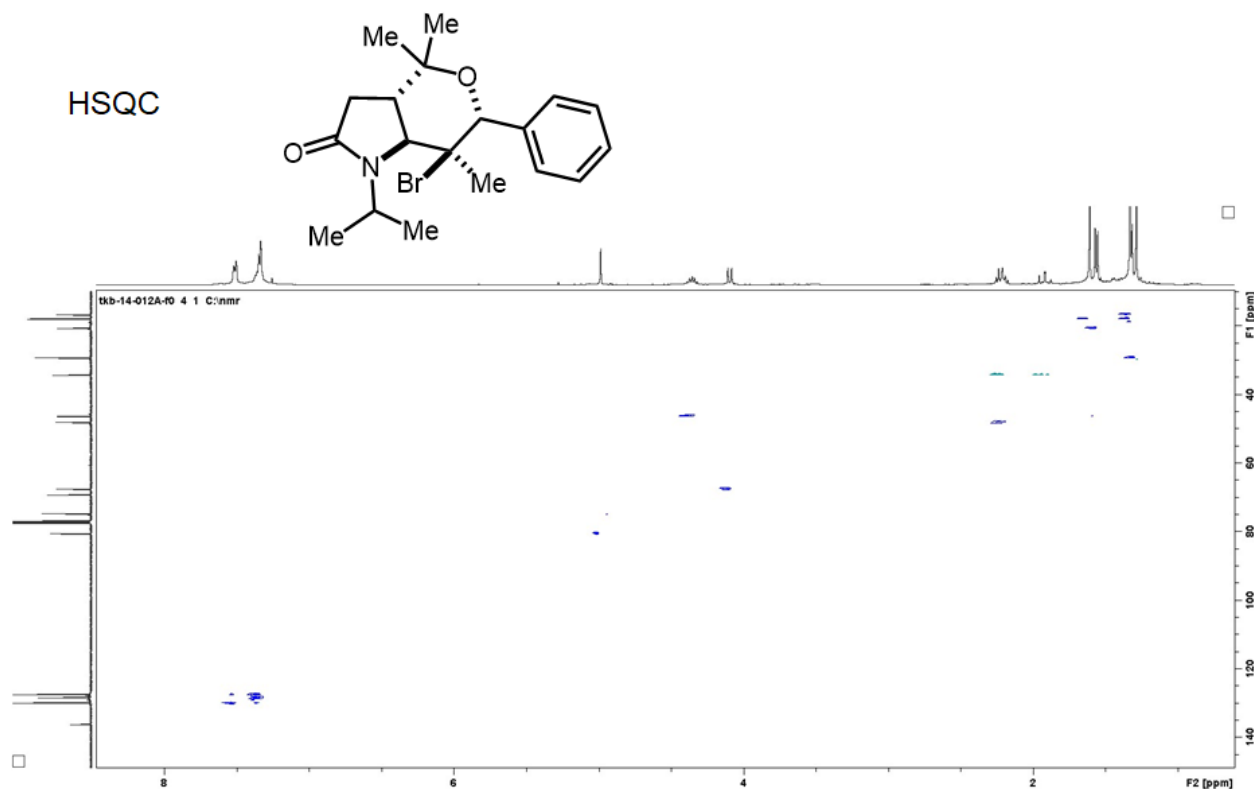

### Compound 4g

Prepared in 1.0 mmol scale using **General Procedure A**. Purification: Flash chromatography on silica eluting with hexane/acetone (90:10 to 70:30). Amorphous solid. Yield = 361.7 mg, 89%, 95:5 dr (*anti:syn*).  $^1\text{H}$  NMR (400 MHz,  $\text{CDCl}_3$ )  $\delta$  7.55 – 7.44 (m, 2H), 7.40 – 7.28 (m, 3H), 4.99 (s, 1H), 4.51 (p,  $J = 8.3$  Hz, 1H), 4.11 (d,  $J = 10.1$  Hz, 1H), 2.46 (dp,  $J = 14.9, 7.2$  Hz, 1H), 2.35 – 2.14 (m, 2H), 2.00 – 1.90 (m, 5H), 1.77 – 1.74 (m, 1H), 1.62 (m, 3H), 1.33 (s, 3H), 1.29 (s, 3H).  $^{13}\text{C}$  NMR (101 MHz,  $\text{CDCl}_3$ )  $\delta$  174.63, 136.12, 129.92, 128.32, 127.38, 80.55, 74.66, 69.37, 68.32, 55.10, 48.12, 34.23, 29.21, 28.64, 27.57, 25.55, 24.96, 17.85, 17.78. **HRMS-EI $^+$**  ( $m/z$ ): calc for  $\text{C}_{21}\text{H}_{28}\text{BrNO}_2$   $[\text{M}]^+$  405.1303, found 405.1307.



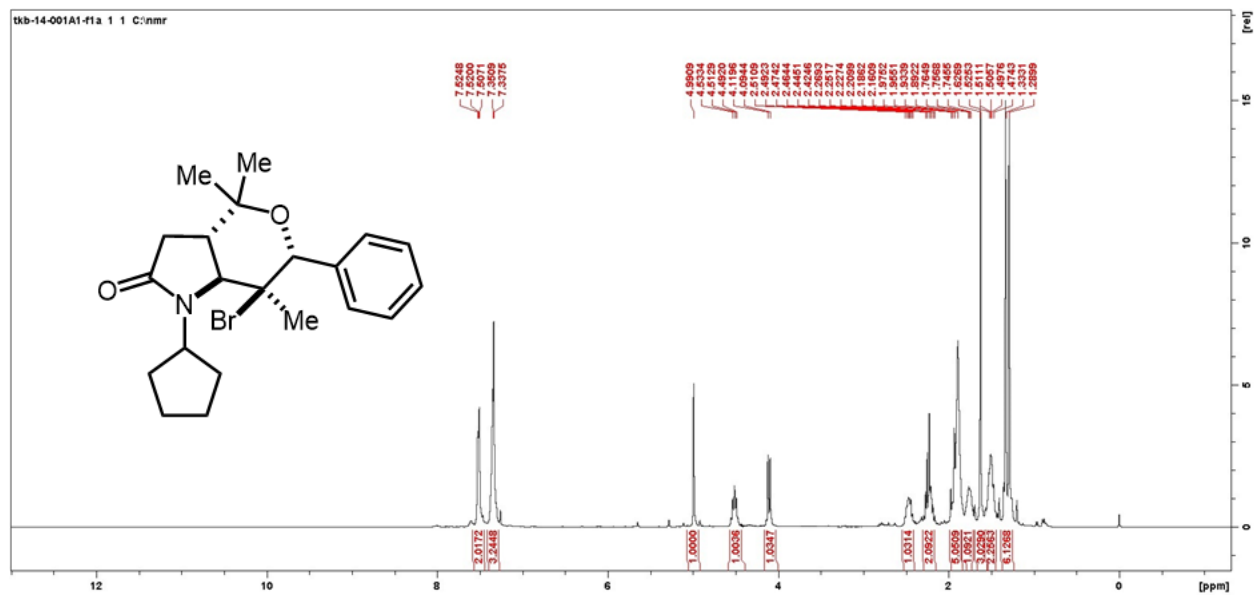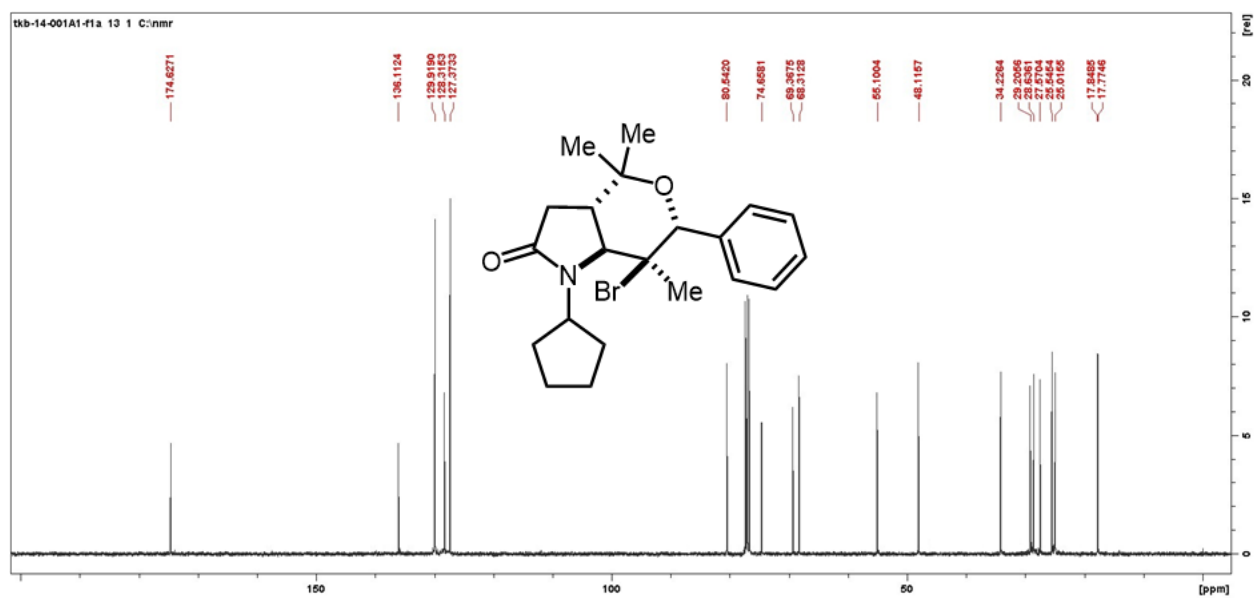

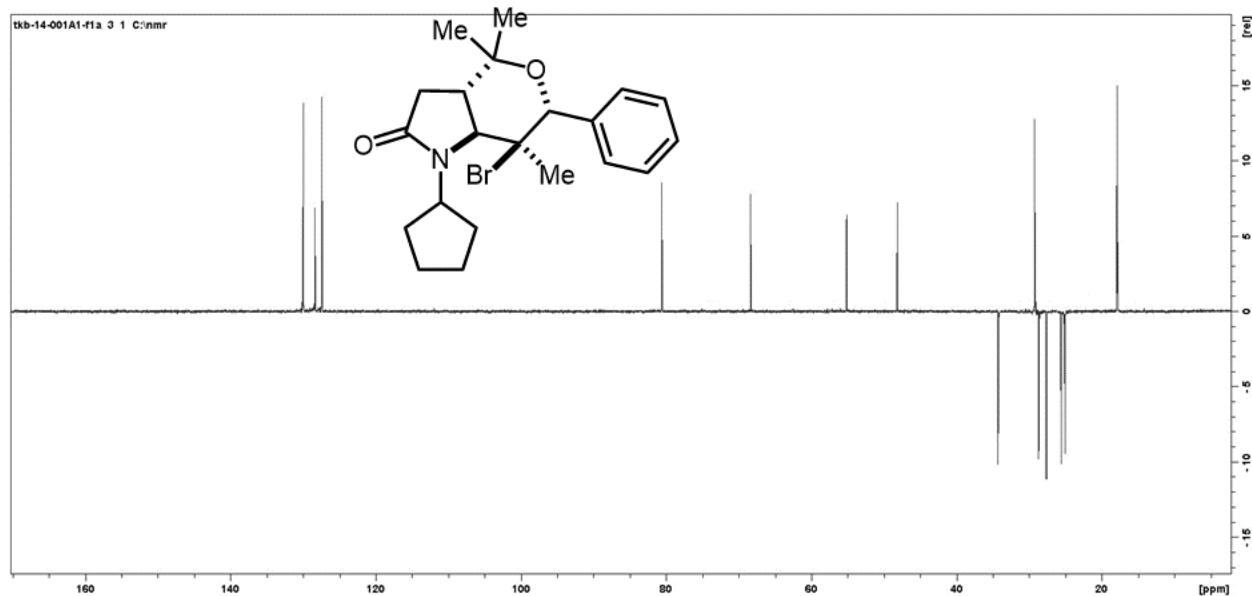

### Compound 4h

Prepared in 1.0 mmol scale using **General Procedure A**. Purification: Flash chromatography on silica eluting with hexane/acetone (90:10 to 60:40). Amorphous solid. Yield = 380.5 mg, 86%, 95:5 dr (*anti:syn*).  $^1\text{H}$  NMR (400 MHz,  $\text{CDCl}_3$ )  $\delta$  7.57 – 7.46 (m, 2H), 7.50 – 7.27 (m, 7H), 7.30 – 7.19 (m, 1H), 5.02 (s, 1H), 4.23 (d,  $J = 11.0$  Hz, 1H), 4.13 – 3.96 (m, 1H), 3.69 (ddd,  $J = 13.7, 11.3, 4.8$  Hz, 1H), 3.19 – 2.69 (m, 2H), 2.50 – 2.25 (m, 2H), 2.15 – 1.93 (m, 1H), 1.63 (s, 3H), 1.39 (s, 3H), 1.35 (s, 3H).  $^{13}\text{C}$  NMR (101 MHz,  $\text{CDCl}_3$ )  $\delta$  175.03, 138.72, 135.96, 129.76, 129.09, 128.46, 128.41, 127.42, 126.41, 80.55, 74.89, 68.68, 66.78, 47.56, 43.37, 33.32, 32.62, 29.33, 18.07, 17.77. **HRMS-EI<sup>+</sup>** ( $m/z$ ): calc for  $\text{C}_{24}\text{H}_{28}\text{BrNO}_2$   $[\text{M}]^+$  441.1303, found 441.1308.

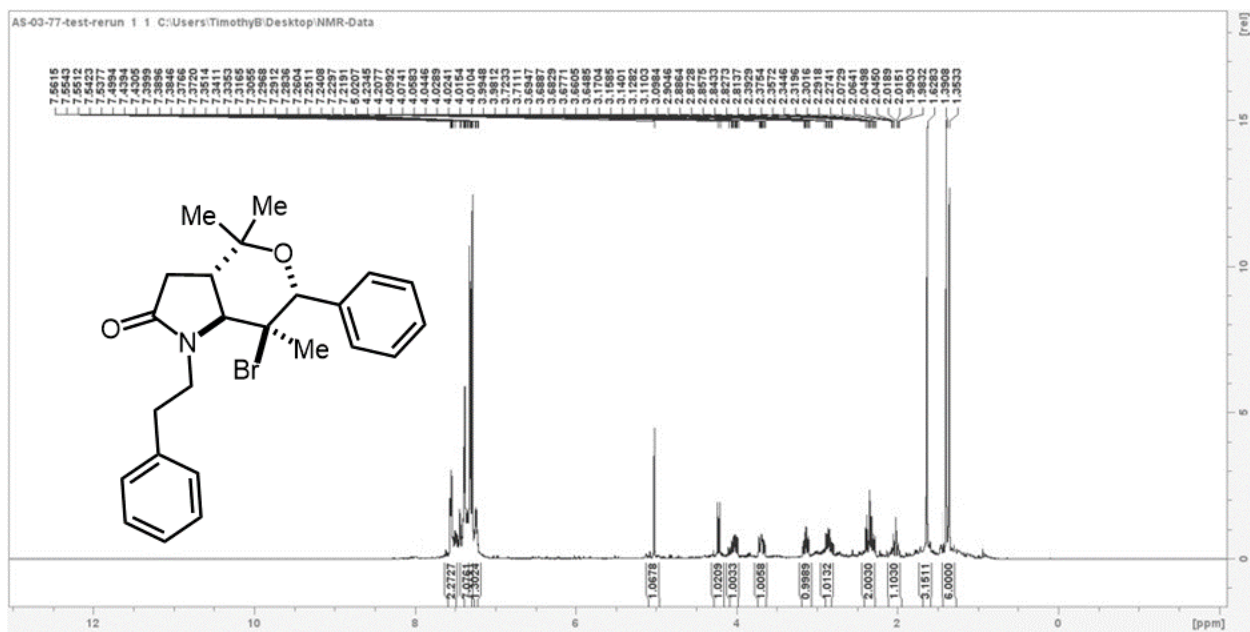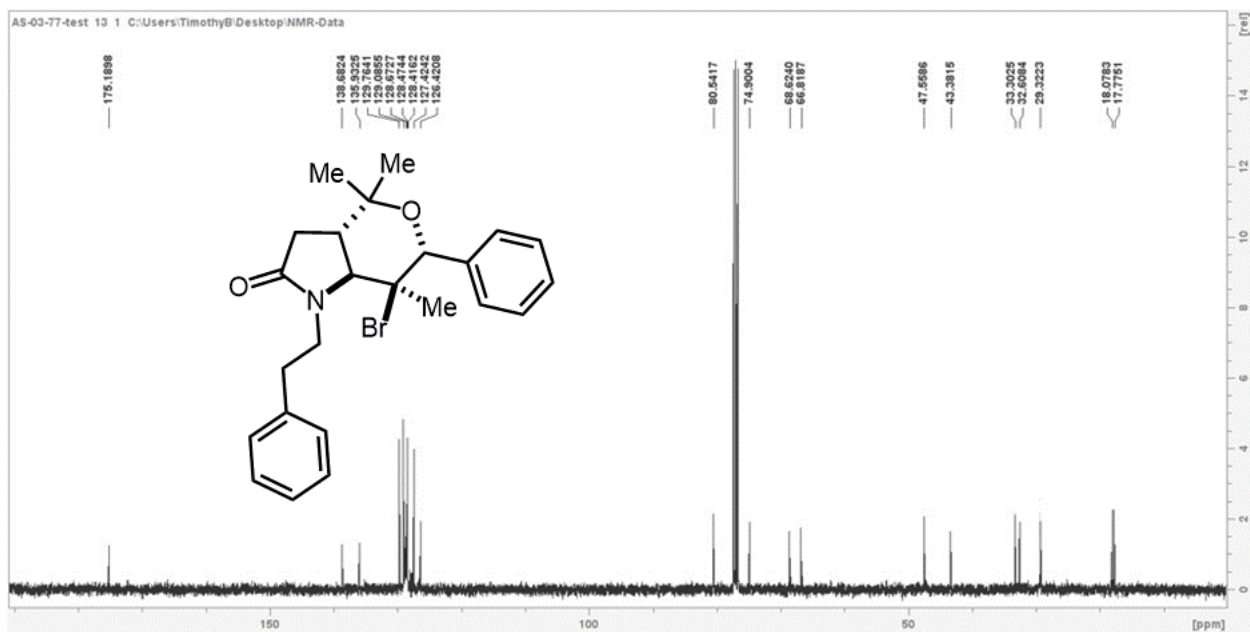

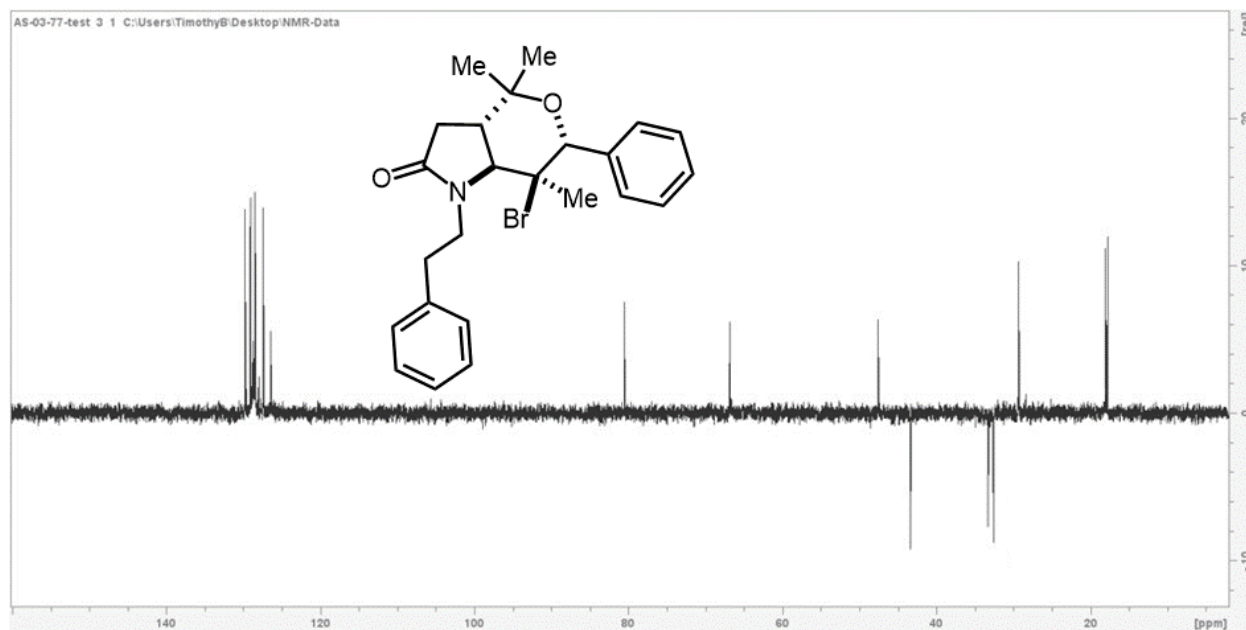

### Compound 4i

Prepared in 1.0 mmol scale using **General Procedure A**. Purification: Flash chromatography on silica eluting with hexane/acetone (90:10 to 60:40). Amorphous solid. Yield = 419.6 mg, 88%, 95:5 dr (*anti:syn*).  $^1\text{H}$  NMR (400 MHz,  $\text{CDCl}_3$ )  $\delta$  7.56 – 7.47 (m, 2H), 7.40 – 7.29 (m, 3H), 7.33 – 7.15 (m, 4H), 4.98 (s, 1H), 4.17 (d,  $J = 11.6$  Hz, 1H), 3.95 (ddd,  $J = 13.7, 11.6, 5.5$  Hz, 1H), 3.62 (ddd,  $J = 13.7, 11.1, 4.8$  Hz, 1H), 3.06 (td,  $J = 12.0, 4.8$  Hz, 1H), 2.79 (ddd,  $J = 12.6, 11.2, 5.5$  Hz, 1H), 2.37 – 2.21 (m, 2H), 2.05 – 1.88 (m, 1H), 1.59 (s, 3H), 1.35 (s, 3H), 1.31 (s, 3H).  $^{13}\text{C}$  NMR (101 MHz,  $\text{CDCl}_3$ )  $\delta$  175.01, 137.20, 135.92, 132.21, 130.42, 129.76, 128.88, 128.61, 128.44, 128.38, 127.51, 127.44, 80.54, 74.88, 68.92, 66.85, 47.58, 43.19, 33.28, 32.06, 29.33, 18.09, 17.76. **HRMS-EI $^+$**  ( $m/z$ ): calc for  $\text{C}_{24}\text{H}_{27}\text{BrClNO}_2$  [ $\text{M}$ ] $^+$  475.0914, found 475.0917.

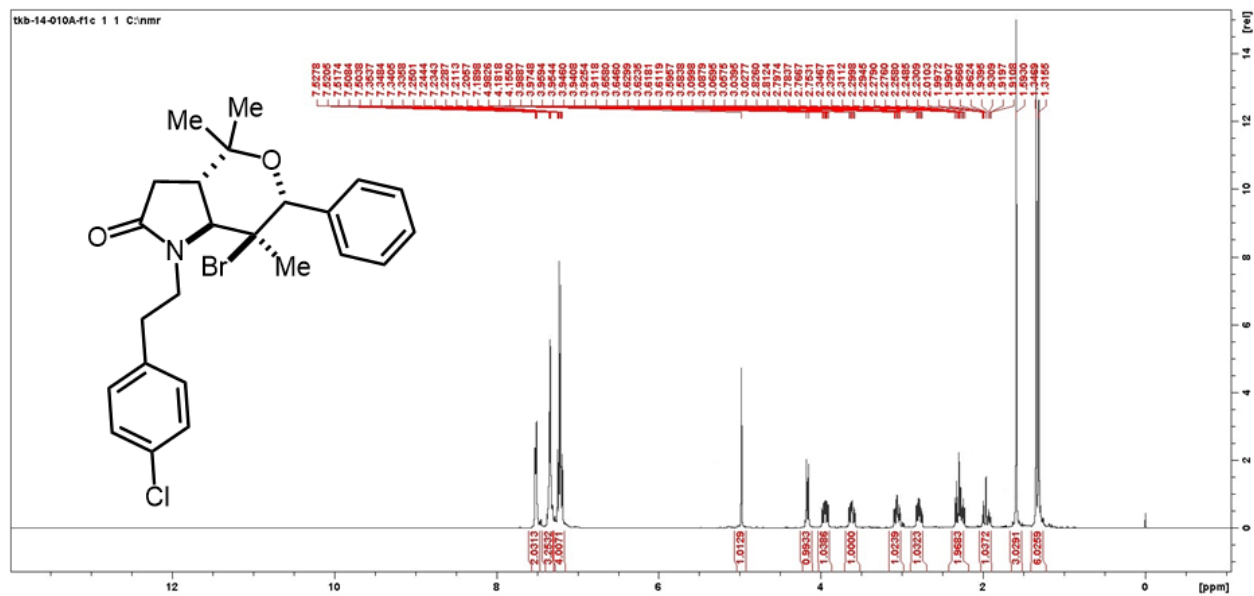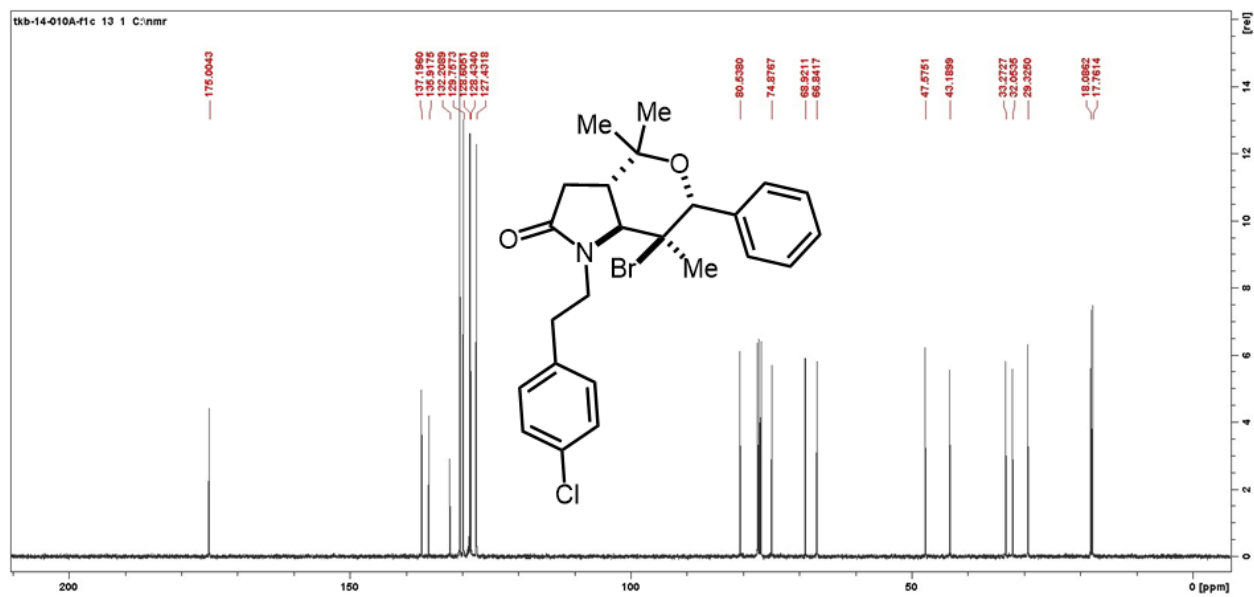

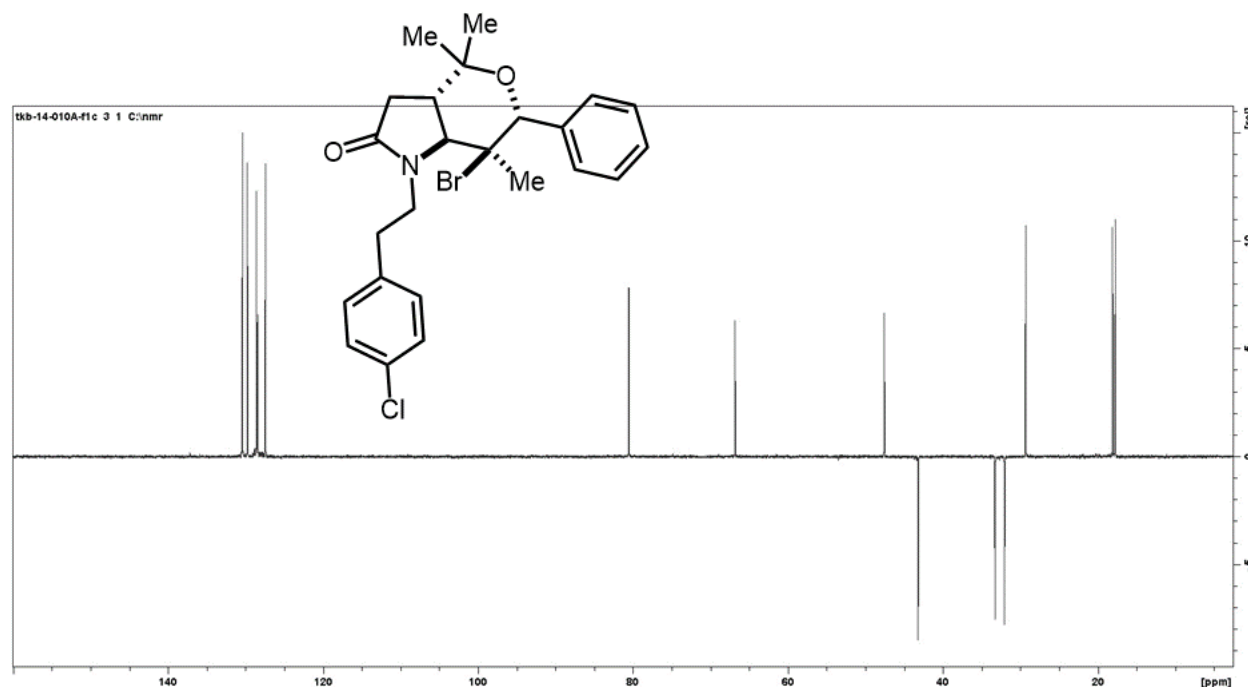

### Compound 4j

Prepared in 1.0 mmol scale using **General Procedure A**. Purification: Flash chromatography on silica eluting with hexane/acetone (90:10 to 60:40). Amorphous solid. Yield = 496.1 mg, 90%, 95:5 dr (*anti:syn*).  $^1\text{H}$  NMR (400 MHz,  $\text{CDCl}_3$ )  $\delta$  7.51 (dq,  $J = 5.2, 3.0$  Hz, 2H), 7.39 (d,  $J = 8.8$  Hz, 1H), 7.39 – 7.28 (m, 3H), 6.88 (d,  $J = 3.1$  Hz, 1H), 6.63 (dd,  $J = 8.8, 3.0$  Hz, 1H), 4.98 (s, 1H), 4.23 (d,  $J = 11.1$  Hz, 1H), 4.10 (ddd,  $J = 13.7, 10.0, 6.0$  Hz, 1H), 3.74 (s, 3H), 3.69 (ddd,  $J = 13.7, 9.8, 5.3$  Hz, 1H), 3.17 (ddd,  $J = 13.0, 10.0, 5.2$  Hz, 1H), 3.02 (ddd,  $J = 13.0, 9.6, 5.9$  Hz, 1H), 2.36 – 2.22 (m, 2H), 2.09 – 1.93 (m, 1H), 1.59 (s, 3H), 1.36 (s, 3H), 1.31 (s, 3H).  $^{13}\text{C}$  NMR (101 MHz,  $\text{CDCl}_3$ )  $\delta$  175.05, 158.96, 139.53, 136.00, 133.34, 129.77, 128.39, 127.39, 116.47, 115.19, 113.96, 80.55, 74.91, 68.51, 66.99, 55.44, 47.66, 41.78, 33.26, 33.19, 29.33, 18.06, 17.78. **HRMS-EI<sup>+</sup>** ( $m/z$ ): calc for  $\text{C}_{25}\text{H}_{29}\text{Br}_2\text{NO}_3$   $[\text{M}]^+$  549.0514, found 549.0510.

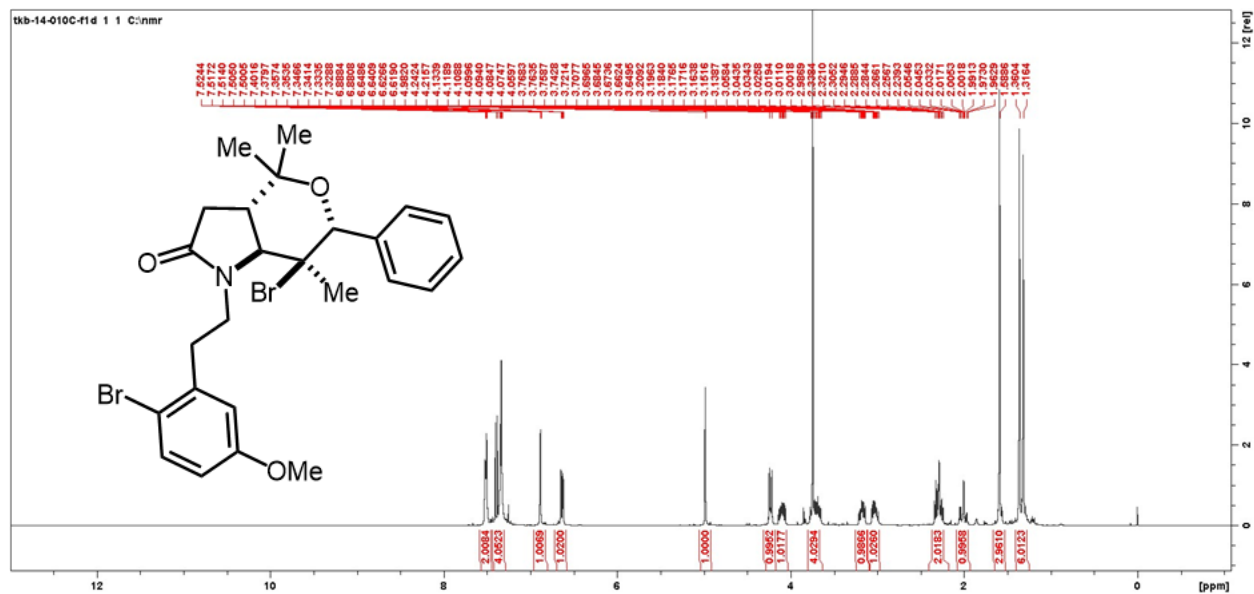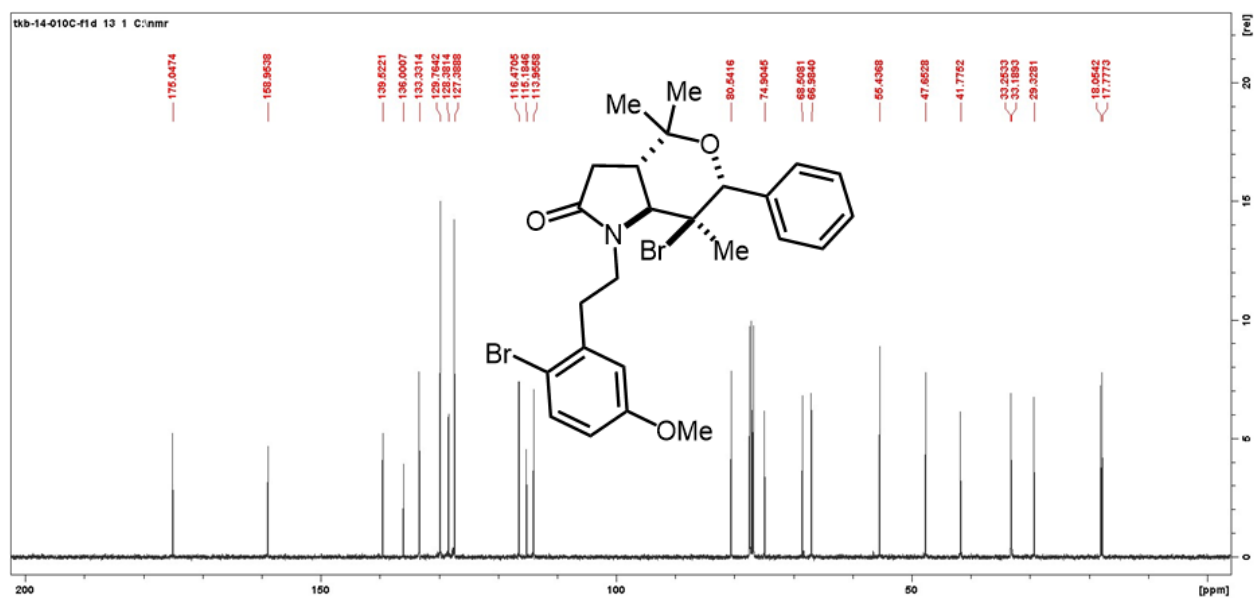

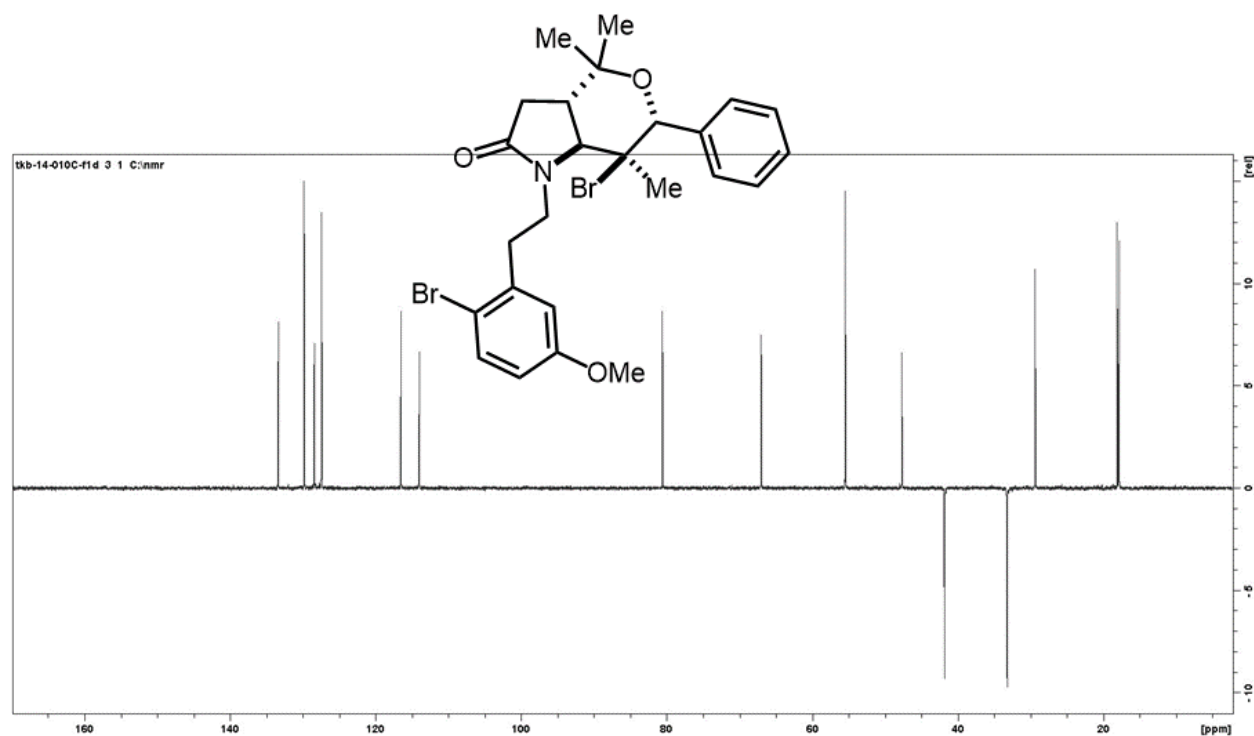

### Compound 4k

Prepared in 1.0 mmol scale using **General Procedure A**. Purification: Flash chromatography on silica eluting with hexane/acetone (90:10 to 70:30). Greenish-yellow oil. Yield = 367.6 mg, 90%, 95:5 dr (*anti:syn*).  $^1\text{H}$  NMR (400 MHz,  $\text{CDCl}_3$ )  $\delta$  7.35 – 7.19 (m, 2H), 7.18 – 7.01 (m, 3H), 4.76 (s, 1H), 4.15 (d,  $J = 9.0$  Hz, 1H), 3.17 (hept,  $J = 6.5$  Hz, 1H), 2.71 – 2.54 (m, 1H), 2.27 (dd,  $J = 17.3, 6.7$  Hz, 1H), 2.10 (dd,  $J = 17.4, 10.2$  Hz, 1H), 1.60 – 1.54 (m, 1H), 1.37 – 1.13 (m, 12H), 0.66 (dt,  $J = 14.8, 7.4$  Hz, 6H).  $^{13}\text{C}$  NMR (101 MHz,  $\text{CDCl}_3$ )  $\delta$  176.59, 138.05, 129.90, 129.66, 128.56, 128.47, 128.27, 127.85, 87.37, 86.27, 71.24, 63.04, 48.40, 47.23, 33.71, 31.10, 22.27, 19.80, 18.37, 8.95, 8.00. **HRMS-EI $^+$**  ( $m/z$ ): calc for  $\text{C}_{21}\text{H}_{30}\text{BrNO}_2$   $[\text{M}]^+$  407.1460, found 407.1466.



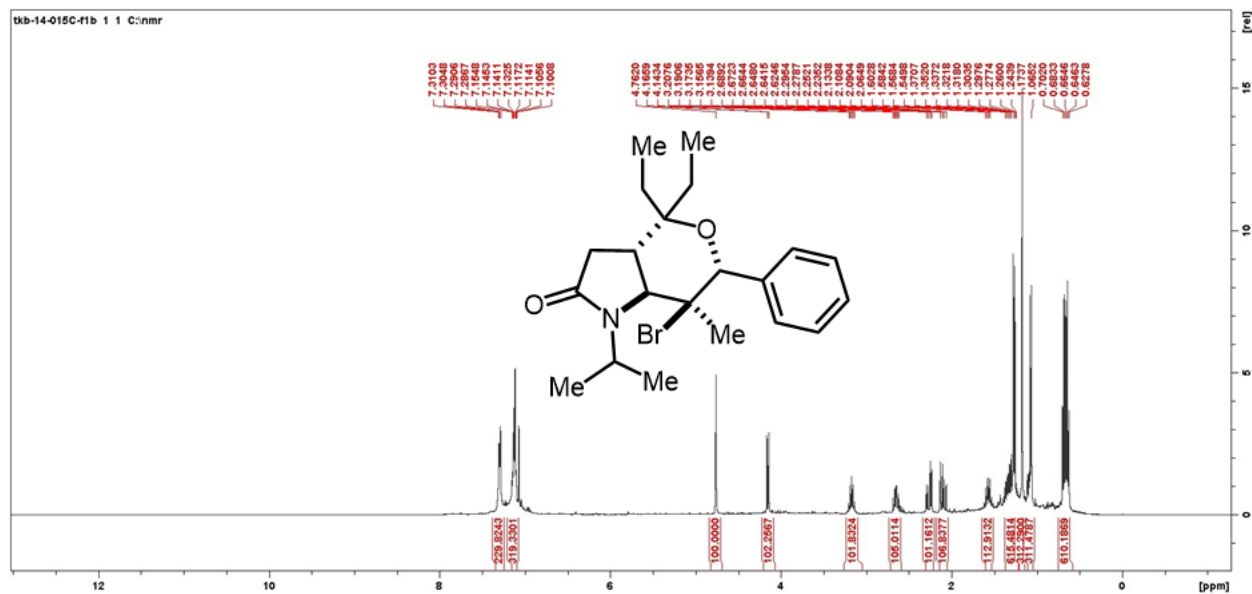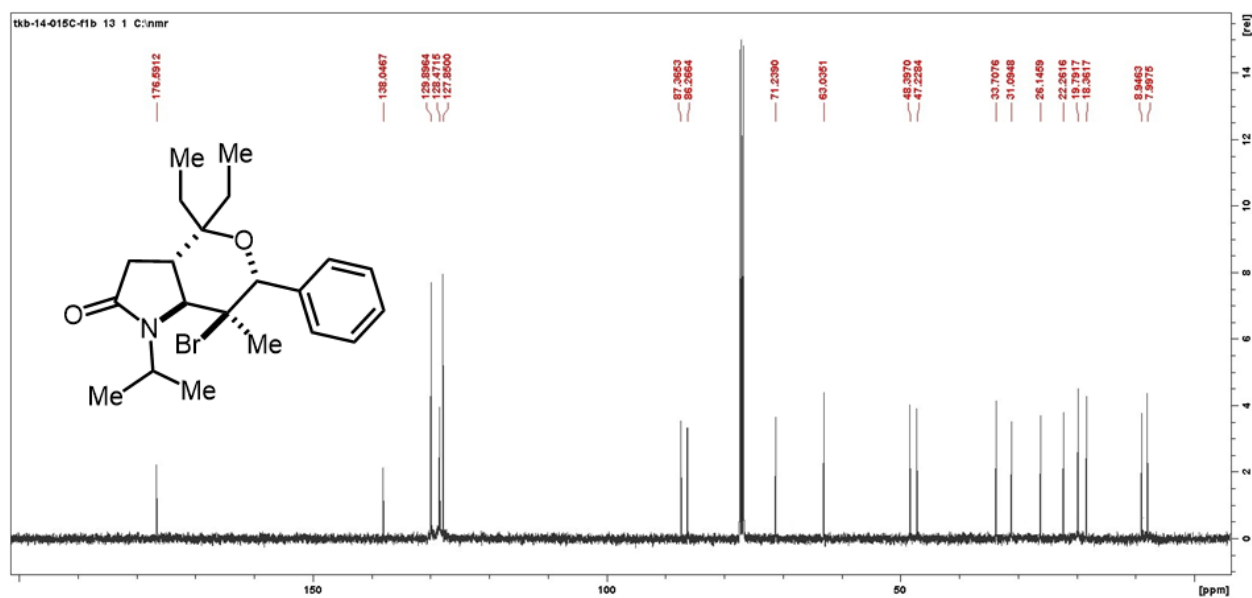

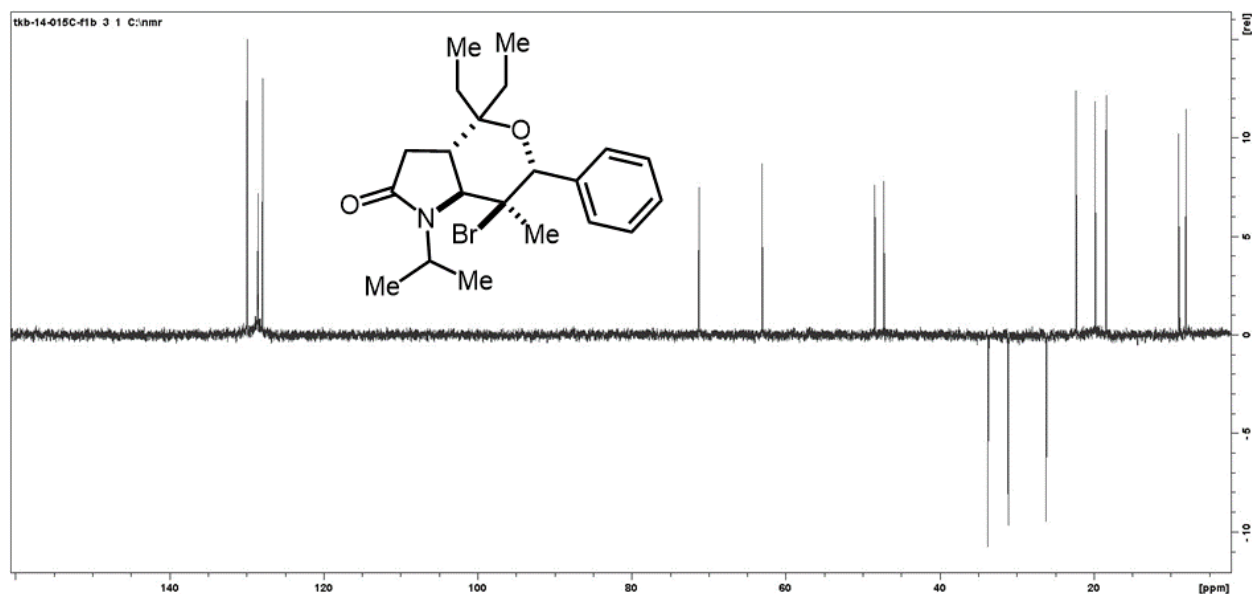

### Compound 4l

Prepared in 1.0 mmol scale using **General Procedure A**. Purification: Flash chromatography on silica eluting with hexane/acetone (90:10 to 50:50). Greenish-yellow oil. Yield = 502.9 mg, 89%, 95:5 dr (*anti:syn*).  $^1\text{H}$  NMR (400 MHz,  $\text{CDCl}_3$ )  $\delta$  7.32 (dt,  $J = 6.3, 3.6$  Hz, 2H), 7.27 – 7.06 (m, 4H), 6.87 (d,  $J = 2.5$  Hz, 1H), 6.56 (d,  $J = 8.7$  Hz, 1H), 4.89 (d,  $J = 17.0$  Hz, 1H), 4.64 – 4.55 (m, 2H), 4.21 (d,  $J = 11.0$  Hz, 1H), 3.61 (s, 3H), 2.50 (ddd,  $J = 13.6, 10.9, 7.1$  Hz, 1H), 2.31 (dd,  $J = 15.5, 7.0$  Hz, 1H), 2.19 – 1.94 (m, 2H), 1.75 (dq,  $J = 14.8, 7.4$  Hz, 1H), 1.44 (s, 3H), 1.27 (dddd,  $J = 16.9, 13.0, 8.7, 4.9$  Hz, 2H), 0.90 (t,  $J = 6.7$  Hz, 3H), 0.72 (t,  $J = 6.7$  Hz, 3H).  $^{13}\text{C}$  NMR (101 MHz,  $\text{CDCl}_3$ )  $\delta$  175.84, 155.98, 136.22, 130.41, 129.62, 129.54, 129.36, 128.24, 127.65, 127.25, 112.73, 112.25, 79.93, 77.80, 67.22, 55.63, 43.84, 40.21, 32.73, 29.76, 21.99, 18.22, 7.44, 6.60. **HRMS-EI $^+$**  ( $m/z$ ): calc for  $\text{C}_{26}\text{H}_{31}\text{Br}_2\text{NO}_3$   $[\text{M}]^+$  563.0671, found 563.0677.

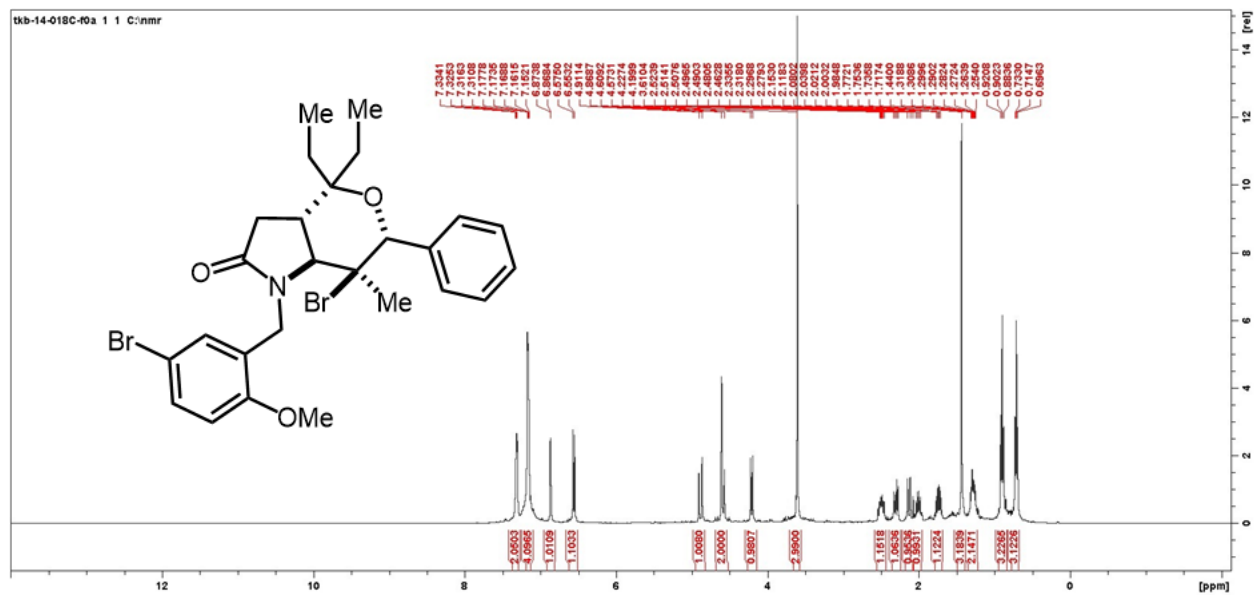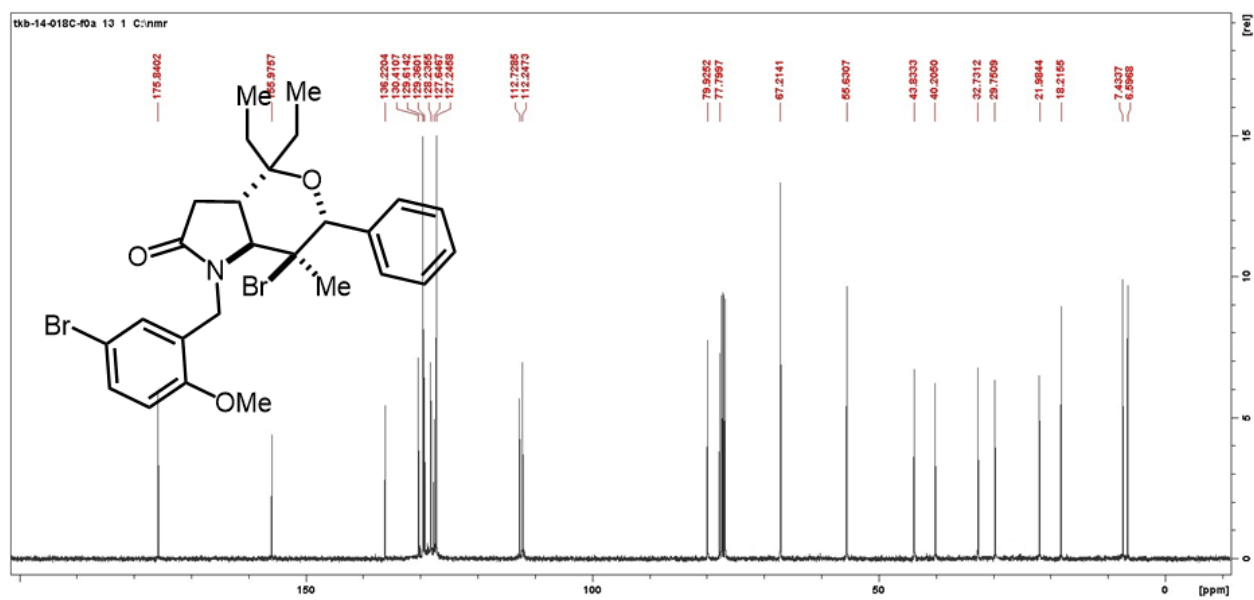

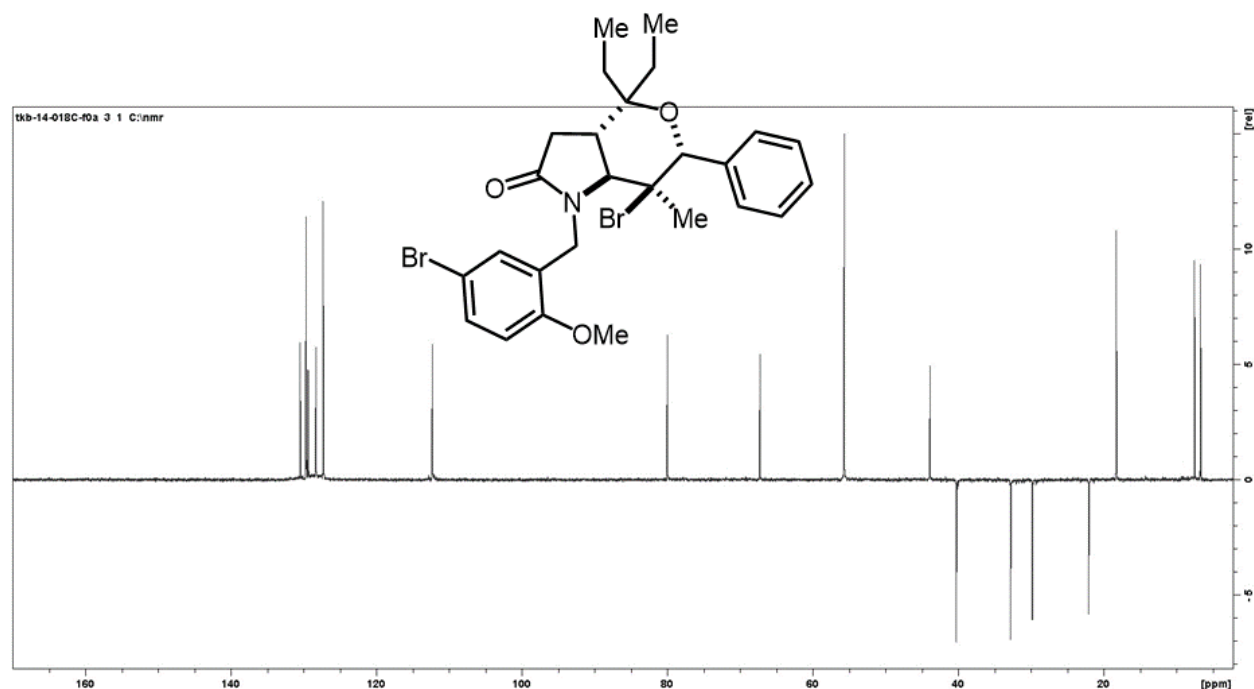

### Compound 4m

Prepared in 1.0 mmol scale using **General Procedure A**. Purification: Flash chromatography on silica eluting with hexane/acetone (90:10 to 70:30). Greenish-yellow oil. Yield = 409.3 mg, 87%, 95:5 dr (*anti:syn*).  $^1\text{H}$  NMR (400 MHz,  $\text{CDCl}_3$ )  $\delta$  7.56 (dt,  $J = 6.1, 3.8$  Hz, 2H), 7.45 – 7.19 (m, 8H), 4.88 (s, 1H), 4.37 (d,  $J = 10.9$  Hz, 1H), 4.06 (ddd,  $J = 13.6, 11.7, 5.5$  Hz, 1H), 3.72 (ddd,  $J = 13.6, 11.2, 4.7$  Hz, 1H), 3.17 (td,  $J = 12.0, 4.7$  Hz, 1H), 2.88 (td,  $J = 11.8, 5.4$  Hz, 1H), 2.55 (ddd,  $J = 13.4, 10.9, 6.9$  Hz, 1H), 2.34 (dd,  $J = 15.3, 7.0$  Hz, 1H), 2.26 – 2.03 (m, 2H), 1.90 (dq,  $J = 14.8, 7.4$  Hz, 1H), 1.66 (s, 3H), 1.45 (ddd,  $J = 10.4, 7.7, 4.2$  Hz, 1H), 1.43 – 1.29 (m, 1H), 1.04 (t,  $J = 7.4$  Hz, 3H), 0.90 (t,  $J = 7.3$  Hz, 3H).  $^{13}\text{C}$  NMR (101 MHz,  $\text{CDCl}_3$ )  $\delta$  175.21, 138.80, 136.31, 129.72, 129.12, 128.51, 128.35, 127.38, 126.44, 80.01, 68.65, 66.43, 43.59, 43.41, 32.88, 32.69, 29.67, 22.02, 18.14, 7.38, 6.65. **HRMS-EI<sup>+</sup>** ( $m/z$ ): calc for  $\text{C}_{26}\text{H}_{32}\text{BrNO}_2$   $[\text{M}]^+$  469.1616, found 469.1612.

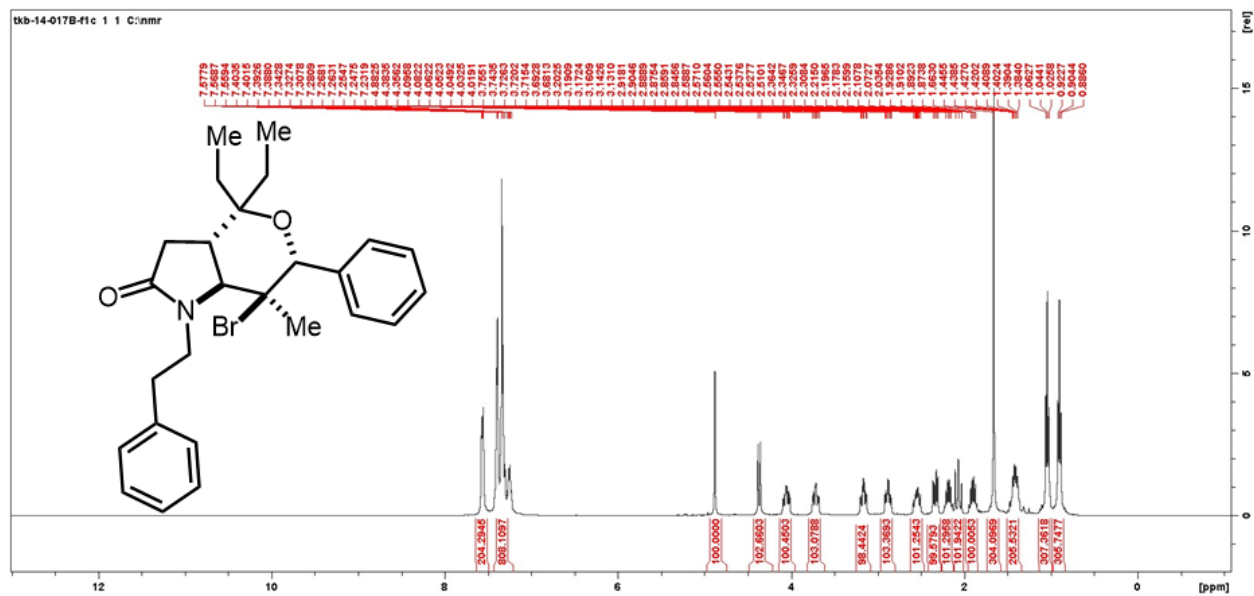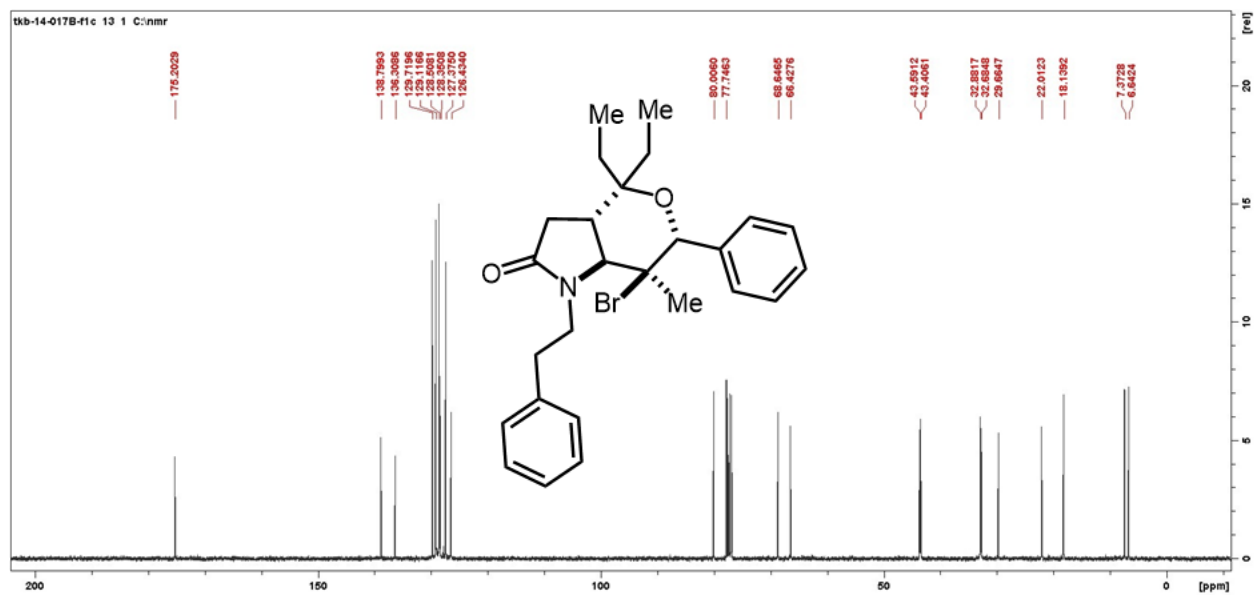

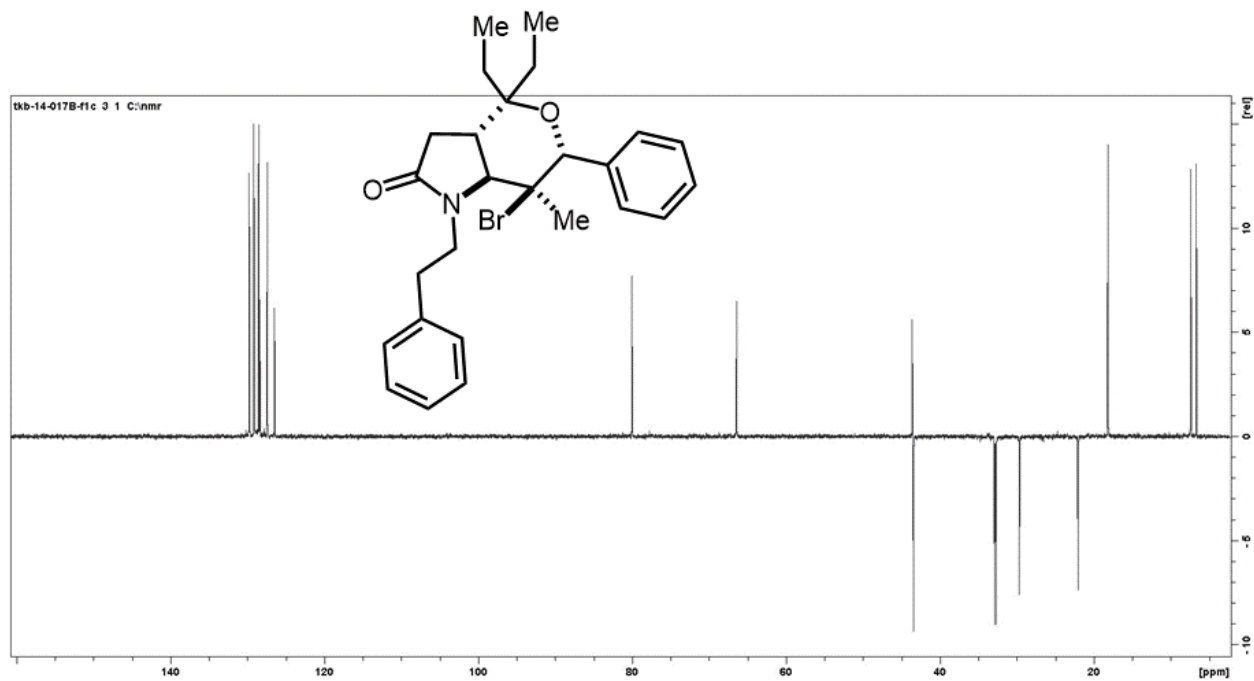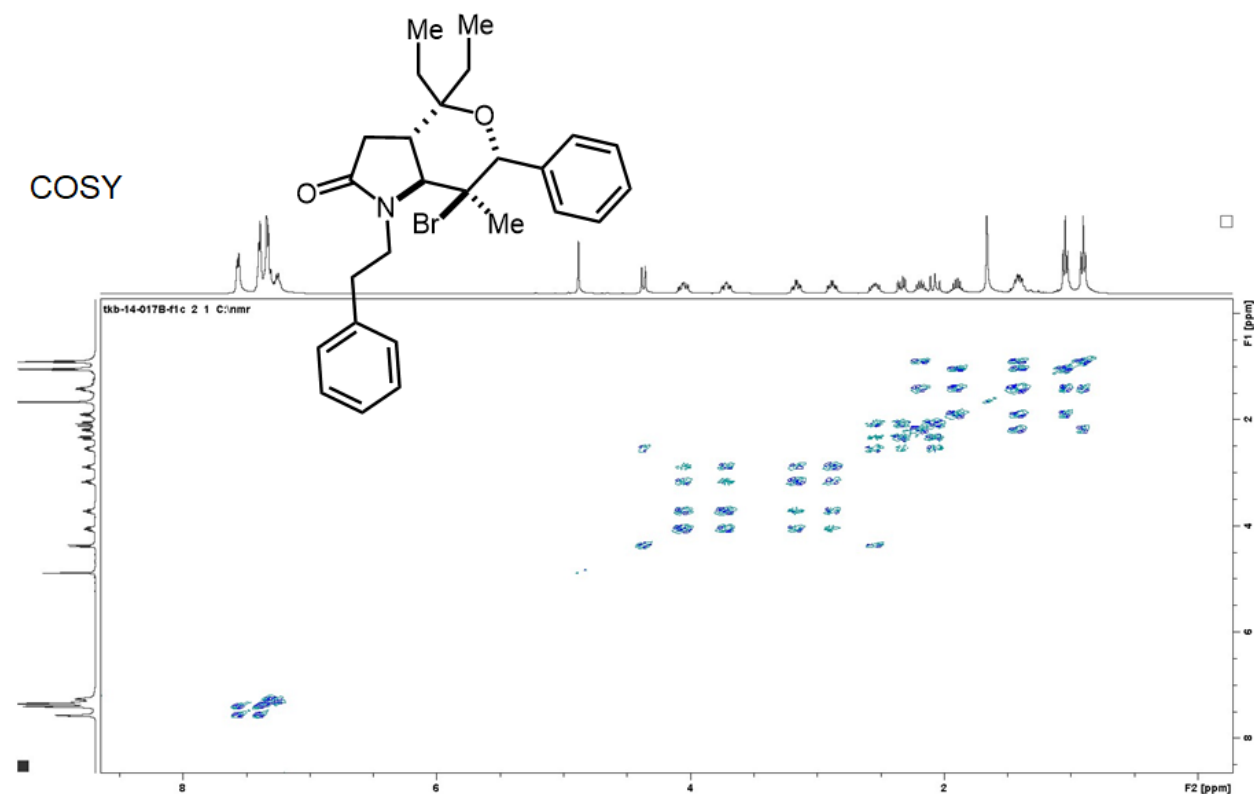

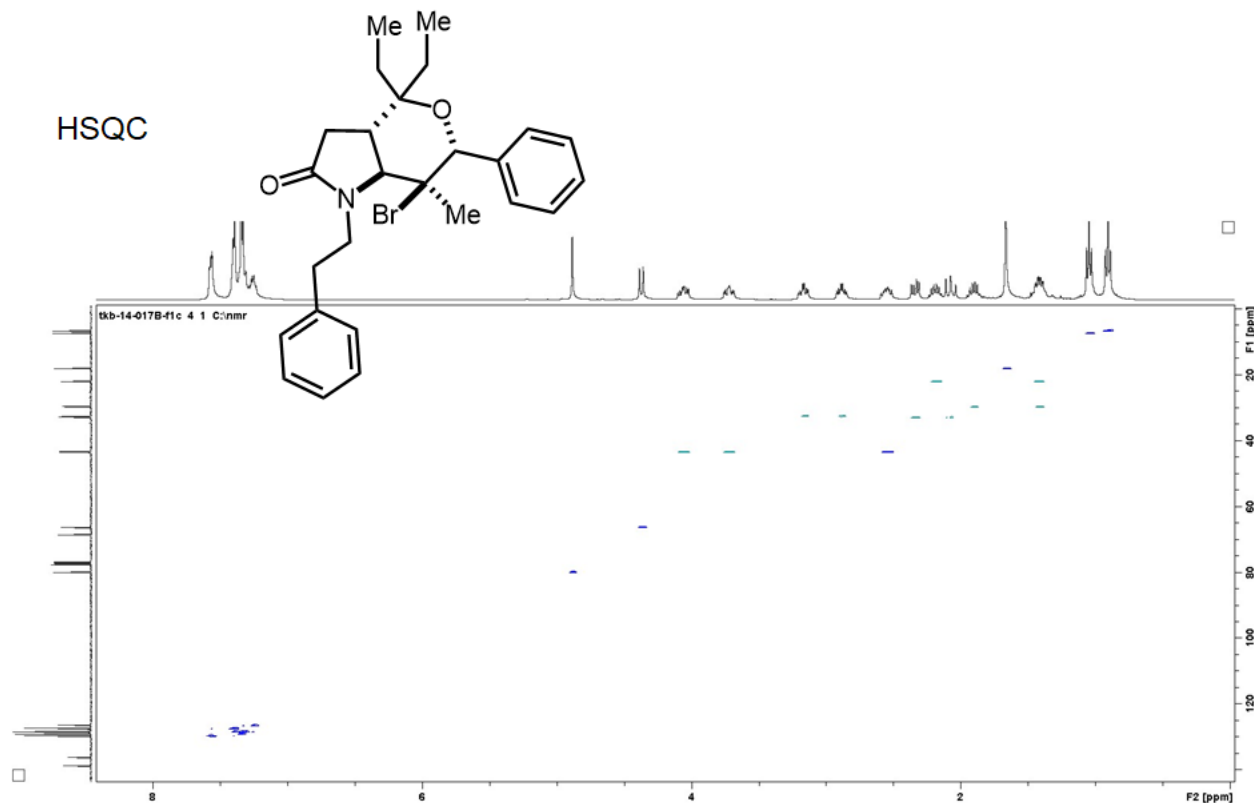

### Compound 4n

Prepared in 1.0 mmol scale using **General Procedure A**. Purification: Flash chromatography on silica eluting with hexane/acetone (90:10 to 70:30). Amorphous solid. Yield = 459.4 mg, 91%, 95:5 dr (*anti:syn*).  $^1\text{H}$  NMR (400 MHz,  $\text{CDCl}_3$ )  $\delta$  7.56 – 7.53 (m, 2H), 7.38 – 7.22 (m, 7H), 4.86 (s, 1H), 4.32 (d,  $J = 9.7$  Hz, 1H), 4.04 (dddd,  $J = 37.6, 13.7, 10.6, 5.7$  Hz, 1H), 3.66 (ddd,  $J = 13.8, 11.2, 4.8$  Hz, 1H), 3.09 (tt,  $J = 10.4, 5.2$  Hz, 1H), 2.88 – 2.72 (m, 1H), 2.60 – 2.45 (m, 1H), 2.38 – 2.26 (m, 1H), 2.26 – 1.98 (m, 2H), 1.94 – 1.77 (m, 1H), 1.64 (s, 3H), 1.59 – 1.24 (m, 2H), 1.05 – 0.86 (m, 6H).  $^{13}\text{C}$  NMR (101 MHz,  $\text{CDCl}_3$ )  $\delta$  175.23, 137.24, 136.22, 132.20, 130.42, 130.38, 130.32, 130.11, 129.68, 128.66, 128.61, 128.36, 127.77, 127.73, 127.36, 86.16, 79.99, 68.80, 66.53, 43.66, 43.21, 32.82, 32.08, 29.68, 21.97, 18.13, 7.35, 6.61. **HRMS-EI**<sup>+</sup> ( $m/z$ ): calc for  $\text{C}_{26}\text{H}_{31}\text{BrClNO}_2$   $[\text{M}]^+$  503.1227, found 503.1222.

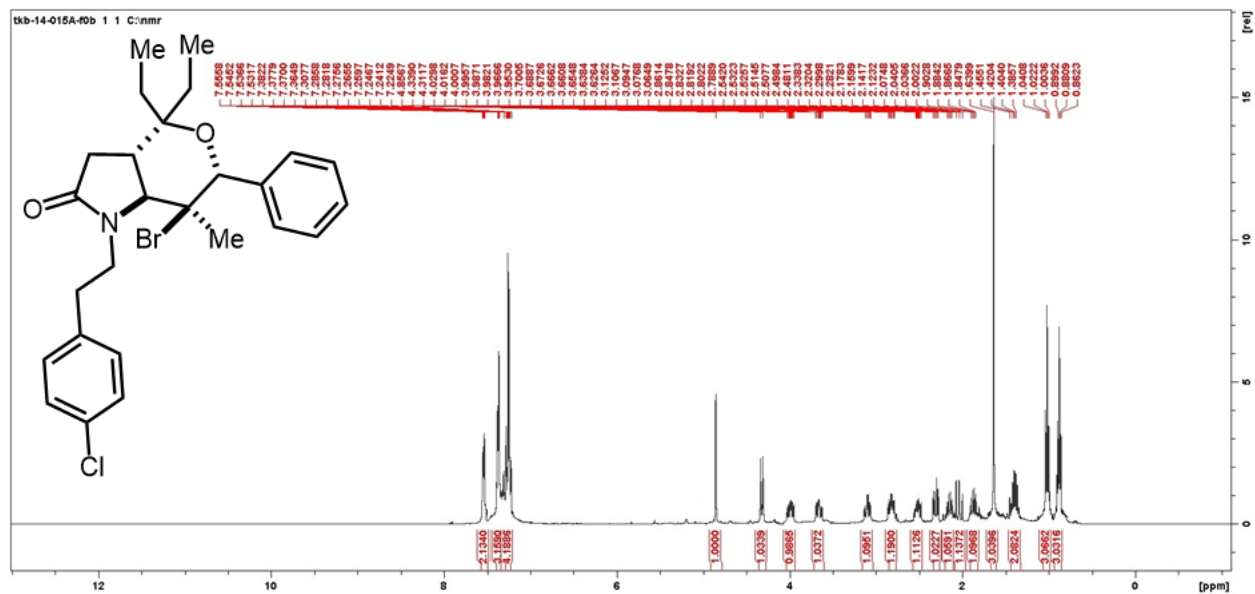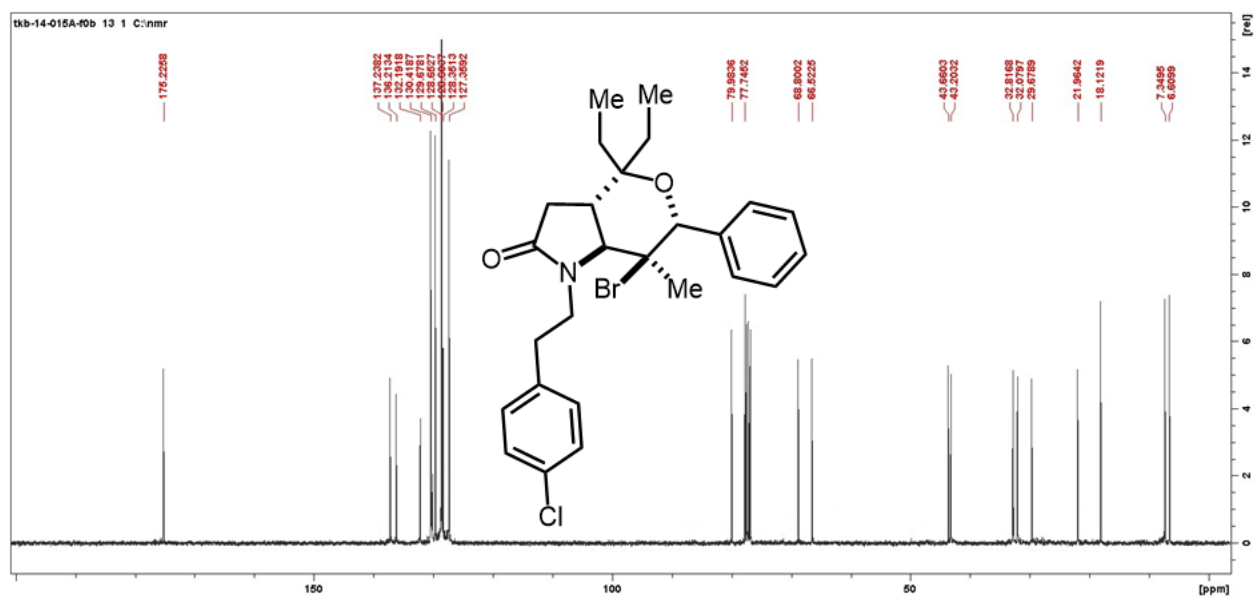



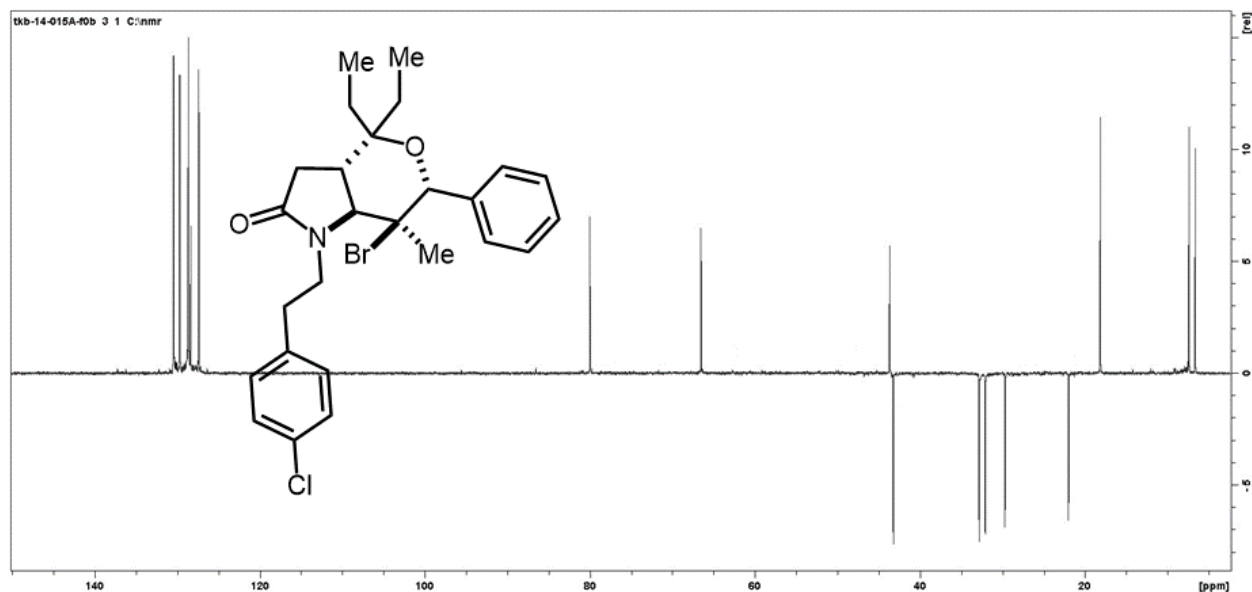

### Compound 4o

Prepared in 1.0 mmol scale using **General Procedure A**. Purification: Flash chromatography on silica eluting with hexane/acetone (90:10 to 50:50). Amorphous solid. Yield = 492.5 mg, 85%, 95:5 dr (*anti:syn*).  $^1\text{H}$  NMR (400 MHz,  $\text{CDCl}_3$ )  $\delta$  7.53 (dt,  $J = 5.7, 3.6$  Hz, 2H), 7.48 (d,  $J = 2.1$  Hz, 1H), 7.45 – 7.34 (m, 3H), 7.21 (dd,  $J = 8.4, 2.1$  Hz, 1H), 6.84 (dd,  $J = 8.4, 3.8$  Hz, 1H), 4.85 (s, 1H), 4.37 – 4.21 (m, 1H), 3.98 (ddd,  $J = 13.4, 11.2, 5.5$  Hz, 1H), 3.87 (s, 3H), 3.71 – 3.59 (m, 1H), 3.04 (td,  $J = 11.9, 4.7$  Hz, 1H), 2.78 (ddt,  $J = 15.8, 9.5, 4.8$  Hz, 1H), 2.61 – 2.46 (m, 1H), 2.31 (dd,  $J = 15.4, 7.0$  Hz, 1H), 2.16 (dq,  $J = 14.7, 7.4$  Hz, 1H), 2.04 (t,  $J = 14.5$  Hz, 1H), 1.88 (tt,  $J = 15.0, 7.5$  Hz, 1H), 1.64 (3, 2H), 1.56 – 1.33 (m, 2H), 1.01 (t,  $J = 7.4$  Hz, 3H), 0.88 (t,  $J = 7.4$  Hz, 3H).  $^{13}\text{C}$  NMR (101 MHz,  $\text{CDCl}_3$ )  $\delta$  175.17, 154.52, 136.23, 133.76, 132.41, 130.01, 129.67, 129.09, 128.34, 127.35, 113.91, 112.07, 111.47, 79.99, 68.75, 66.47, 56.28, 43.63, 43.26, 32.82, 31.45, 29.66, 21.98, 18.12, 7.33, 6.60. **HRMS-EI<sup>+</sup>** ( $m/z$ ): calc for  $\text{C}_{27}\text{H}_{33}\text{Br}_2\text{NO}_3$   $[\text{M}]^+$  577.0827, found 577.0821.

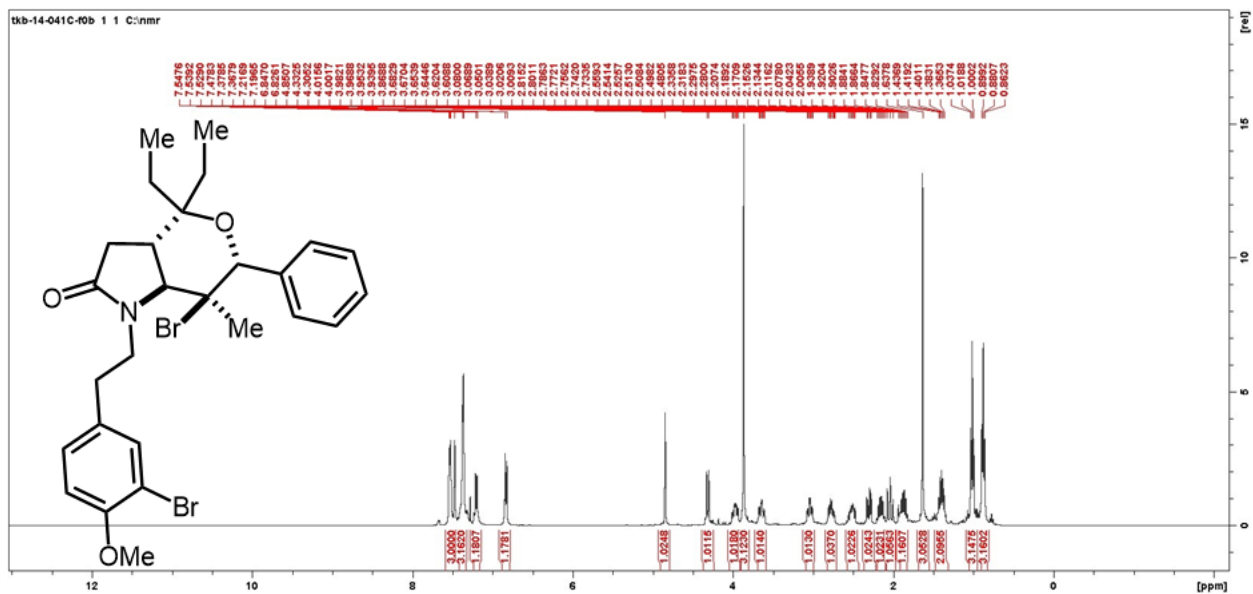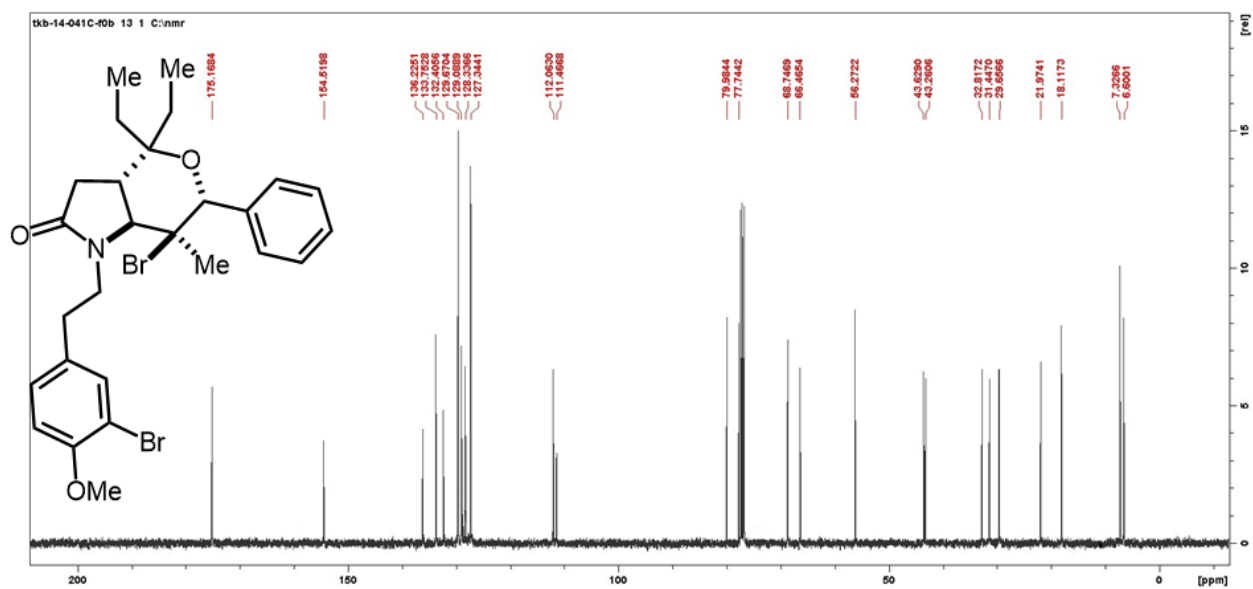

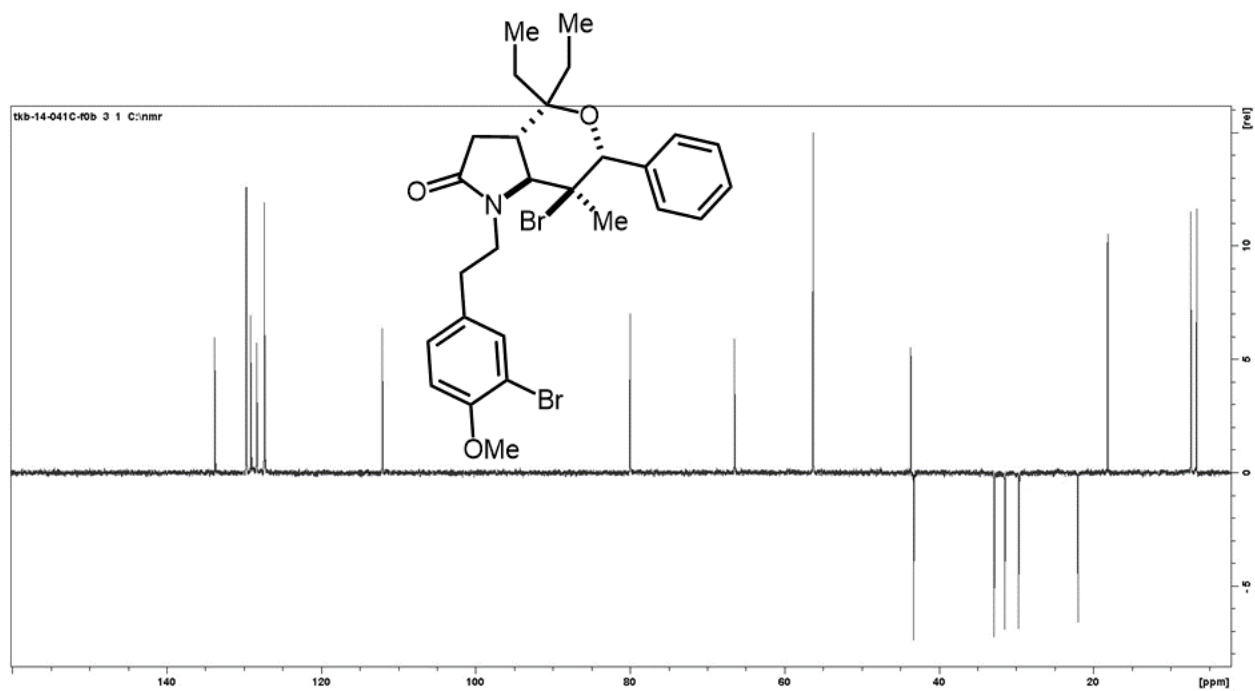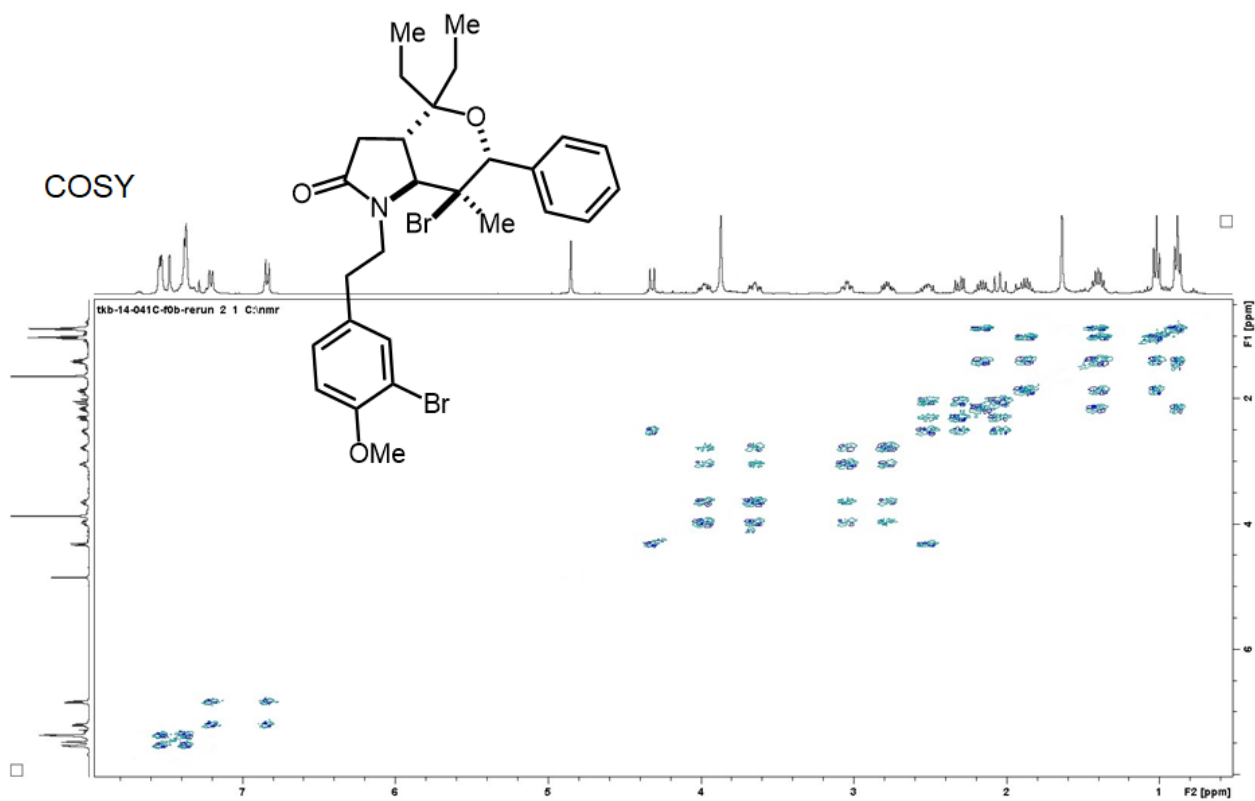

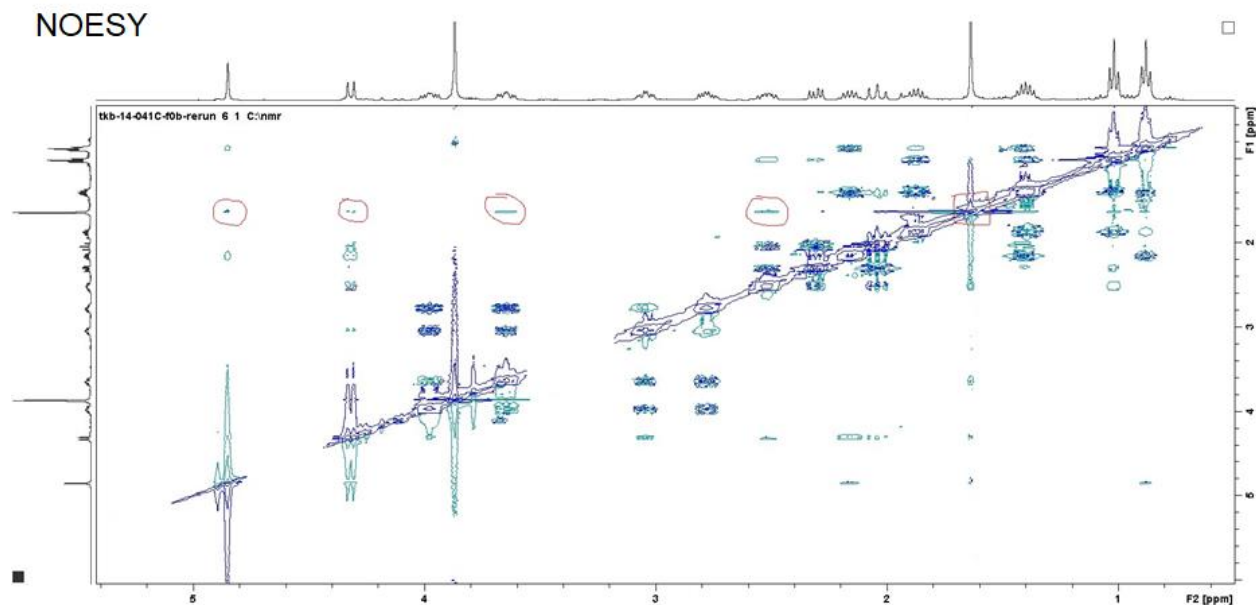

### Compound 4p

Prepared in 1.0 mmol scale using **General Procedure A**. Purification: Flash chromatography on silica eluting with hexane/acetone (90:10 to 70:30). Amorphous solid. Yield = 401.6 mg, 88%, 95:5 dr (*anti:syn*).  $^1\text{H}$  NMR (400 MHz,  $\text{CDCl}_3$ )  $\delta$  8.02 – 7.95 (m, 2H), 7.66 – 7.56 (m, 1H), 7.55 – 7.44 (m, 4H), 7.43 – 7.28 (m, 3H), 5.85 (d,  $J = 9.5$  Hz, 2H), 5.04 (s, 1H), 4.59 (d,  $J = 11.2$  Hz, 1H), 3.02 – 2.87 (m, 2H), 2.55 (td,  $J = 11.0, 3.3$  Hz, 1H), 1.76 (s, 3H), 1.49 (s, 3H), 1.38 (s, 3H).  $^{13}\text{C}$  NMR (101 MHz,  $\text{CDCl}_3$ )  $\delta$  193.59, 167.99, 136.45, 135.19, 133.72, 130.27, 128.82, 128.44, 128.03, 127.32, 79.90, 74.49, 70.37, 67.44, 57.81, 51.91, 46.67, 44.78, 28.53, 18.75, 18.34. **HRMS-EI<sup>+</sup>** ( $m/z$ ): calc for  $\text{C}_{24}\text{H}_{26}\text{BrNO}_3$   $[\text{M}]^+$  455.1096, found 455.1093.

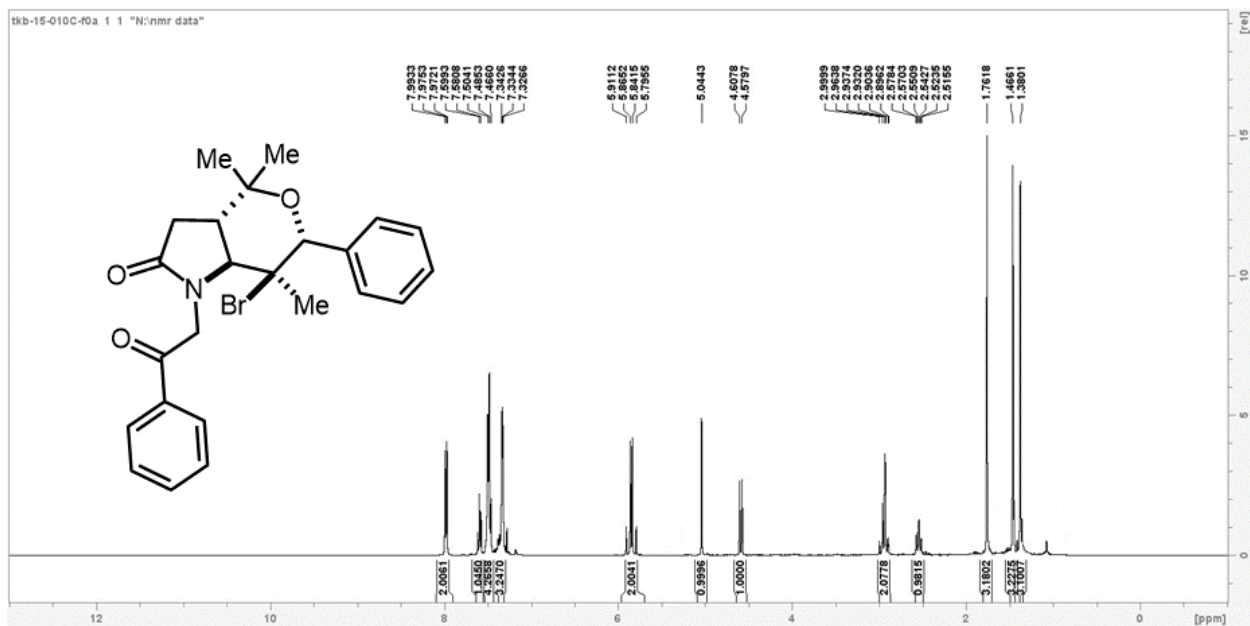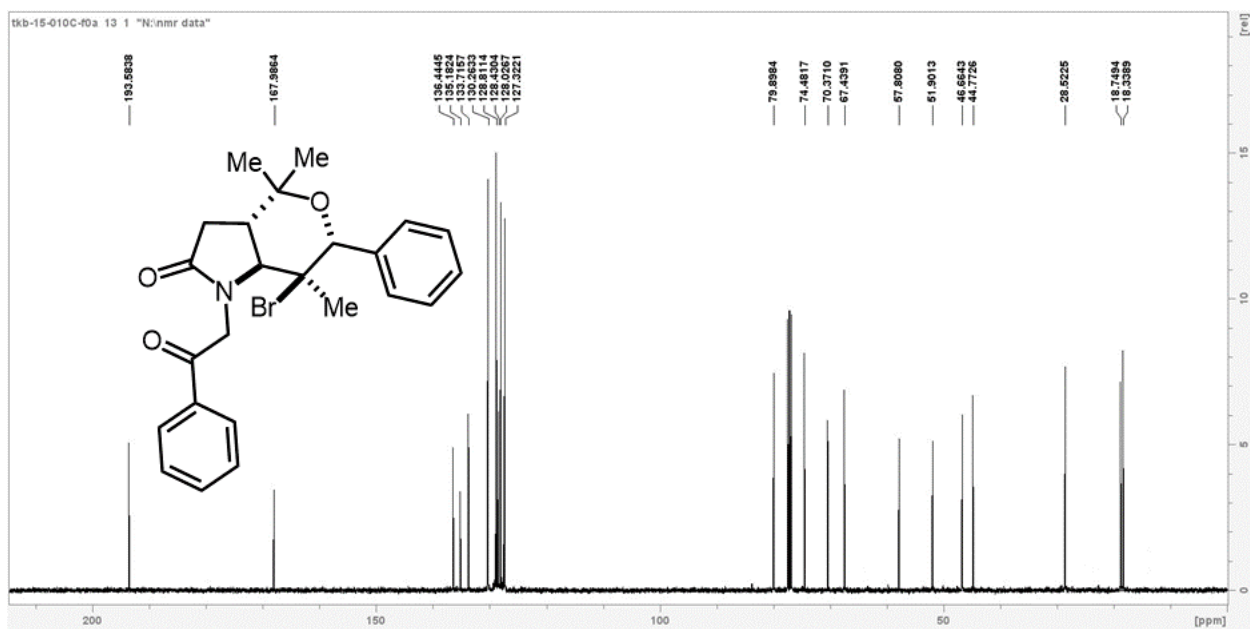

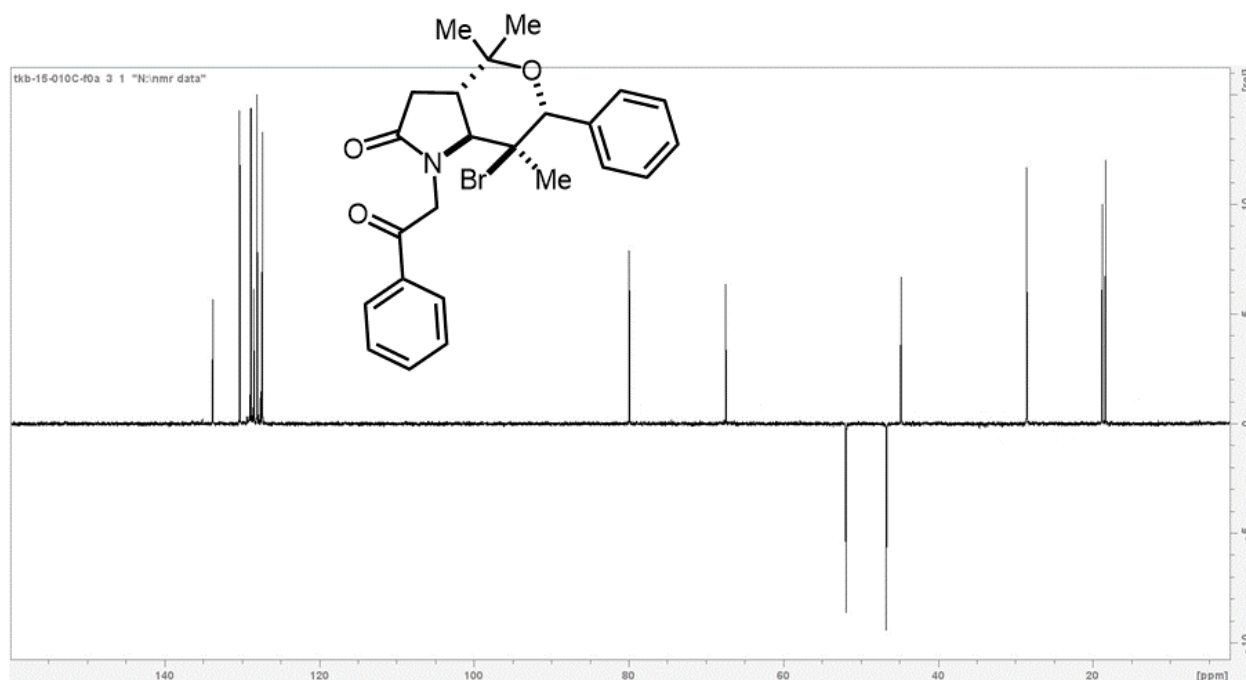

### Compound 4q

Prepared in 1.0 mmol scale using **General Procedure A**. Purification: Flash chromatography on silica eluting with hexane/acetone (90:10 to 70:30). Amorphous solid. Yield = 392.5 mg, 88%, 95:5 dr (*anti:syn*).  $^1\text{H NMR}$  (400 MHz,  $\text{CDCl}_3$ )  $\delta$  7.47 – 7.44 (m, 2H), 7.31 – 7.24 (m, 5H), 7.00 – 6.95 (m, 2H), 4.97 (d,  $J = 15.5$  Hz, 1H), 4.90 (s, 1H), 4.71 (d,  $J = 15.4$  Hz, 1H), 4.17 (d,  $J = 10.7$  Hz, 1H), 2.49 – 2.29 (m, 2H), 2.10 (dd,  $J = 14.8, 12.9$  Hz, 1H), 1.46 (s, 3H), 1.33 (s, 6H).  $^{13}\text{C NMR}$  (101 MHz,  $\text{CDCl}_3$ )  $\delta$  175.77, 163.14, 160.70, 135.88, 133.23, 133.19, 129.72, 129.69, 129.61, 128.76, 128.37, 128.29, 128.27, 127.96, 127.59, 127.36, 115.28, 115.07, 80.51, 74.87, 68.25, 67.80, 47.60, 44.54, 33.18, 29.32, 18.20, 17.79. **HRMS-EI<sup>+</sup>** ( $m/z$ ): calc for  $\text{C}_{23}\text{H}_{25}\text{BrFNO}_2$  [ $\text{M}$ ]<sup>+</sup> 445.1053, found 445.1053.

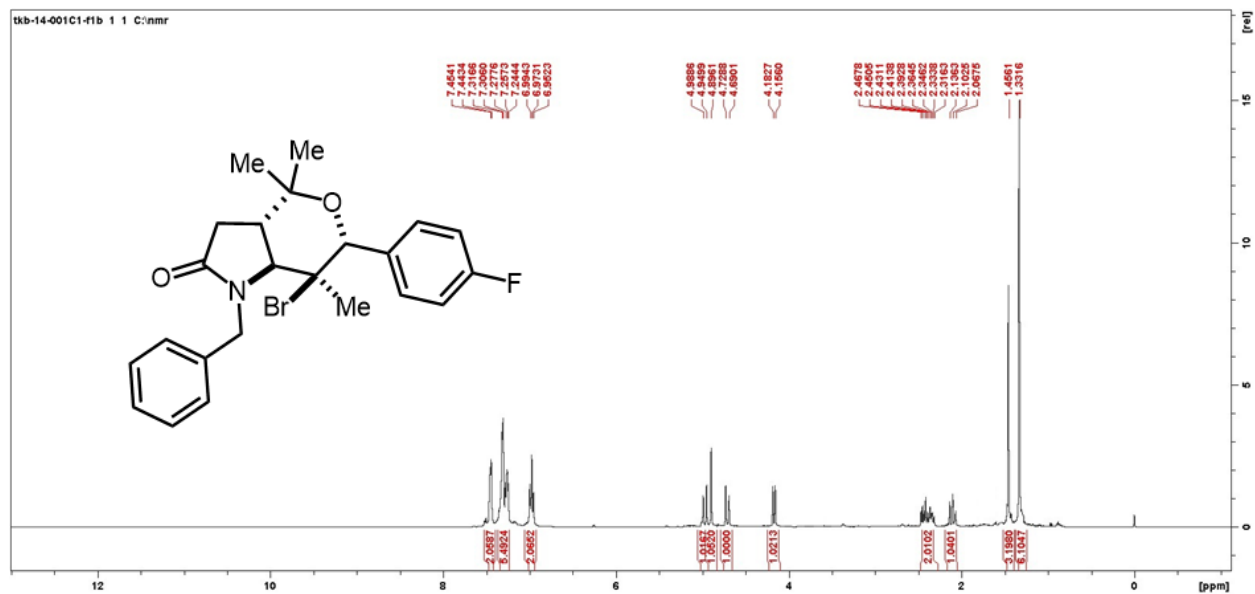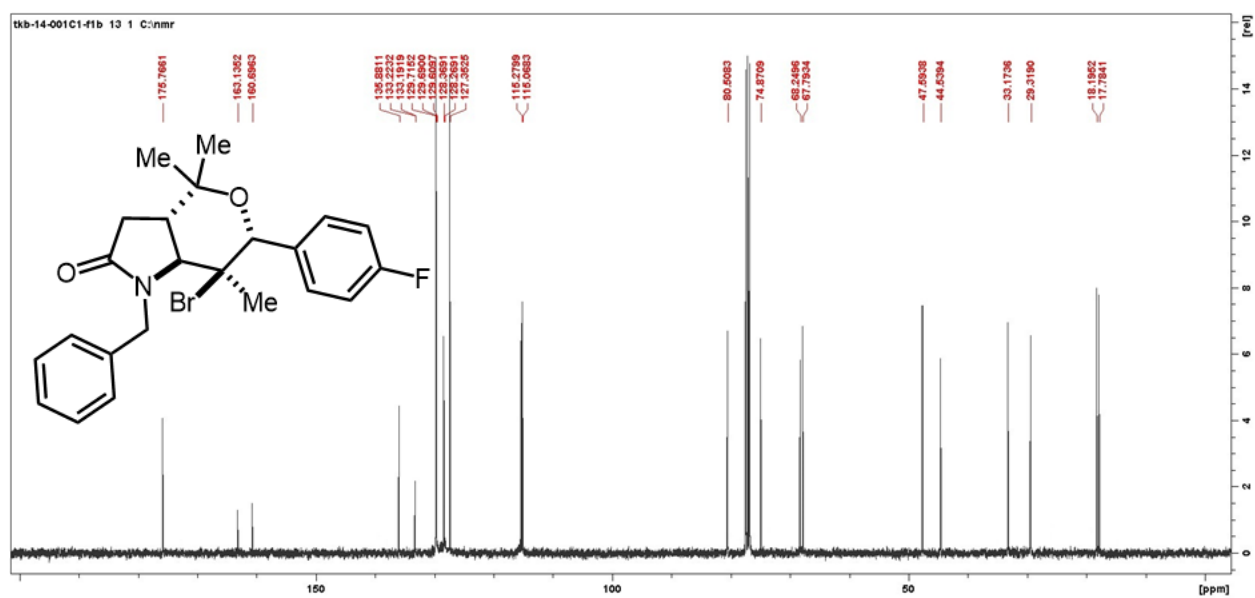

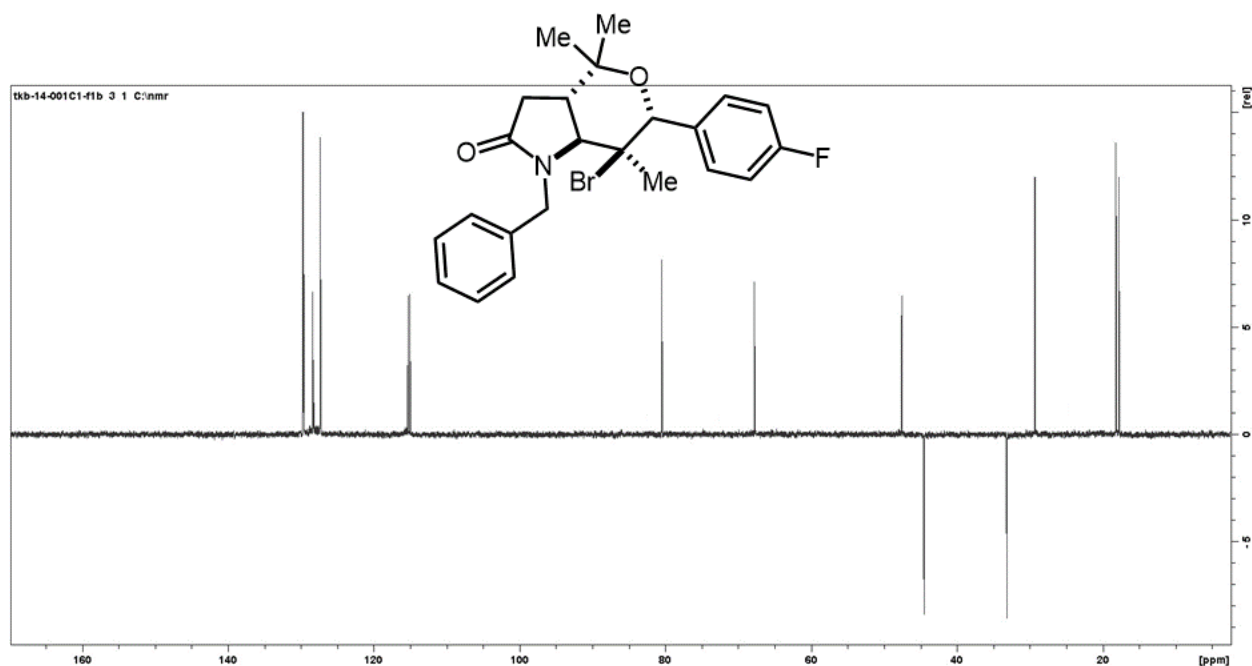<sup>19</sup>F NMR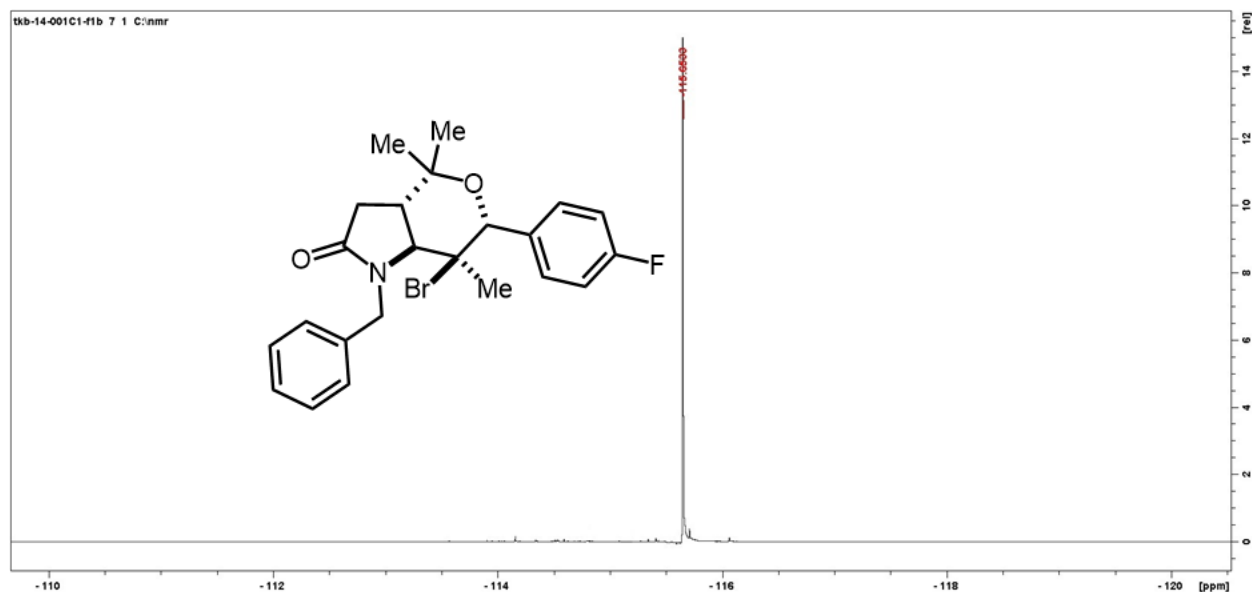**Compound 4r**

Prepared in 1.0 mmol scale using **General Procedure A**. Purification: Flash chromatography on silica eluting with hexane/acetone (90:10 to 70:30). Amorphous solid. Yield = 431.2 mg, 85%, 95:5 dr (*anti:syn*). <sup>1</sup>H NMR (400 MHz, CDCl<sub>3</sub>) δ 7.45 (dtt, J = 5.8, 3.6, 1.5 Hz, 2H), 7.32 – 7.20 (m, 7H), 4.98 (d, J = 15.7 Hz, 1H), 4.89 (s, 1H), 4.70 (d, J = 15.7 Hz, 1H), 4.16 (d, J = 10.7 Hz, 1H), 2.51 – 2.30 (m, 2H), 2.18 – 2.06 (m, 1H), 1.46 (s, 3H), 1.34 (s, 6H). <sup>13</sup>C NMR (101 MHz, CDCl<sub>3</sub>) δ 175.70, 136.01, 135.86, 132.84, 129.70, 129.38, 128.50, 128.37, 127.35, 80.50, 74.87,



68.20, 67.78, 47.60, 44.64, 33.17, 31.59, 29.32, 22.65, 18.22, 17.78, 14.11. **HRMS- $EI^+$**  ( $m/z$ ): calc for  $C_{23}H_{25}Br_2NO_2$   $[M]^+$  505.0252, found 505.0257.

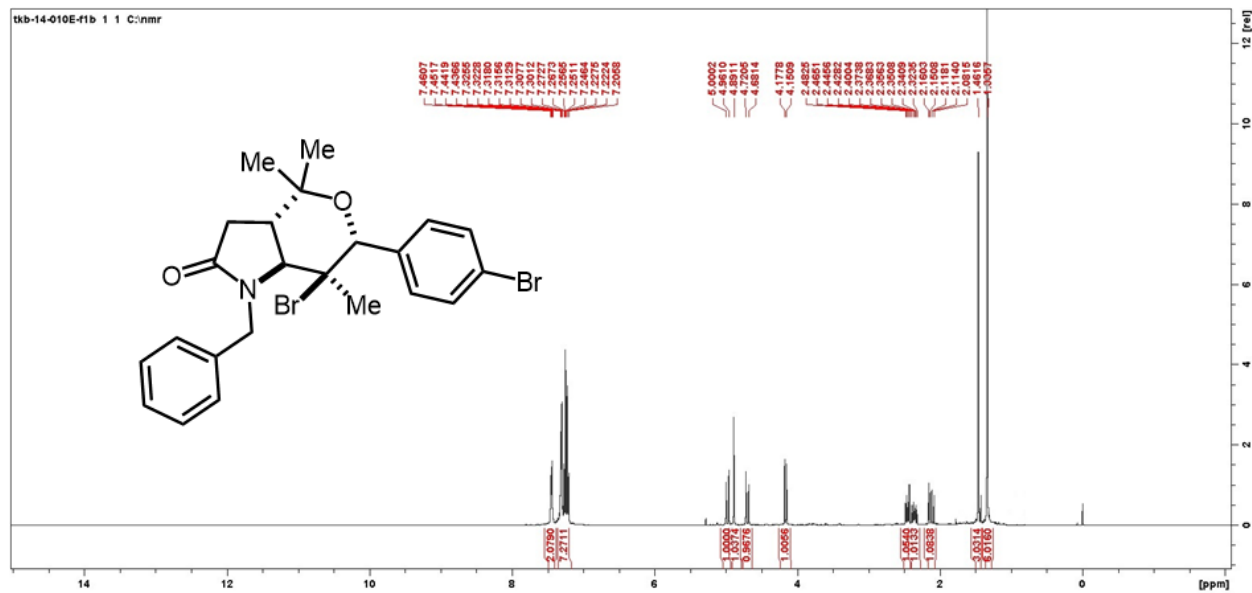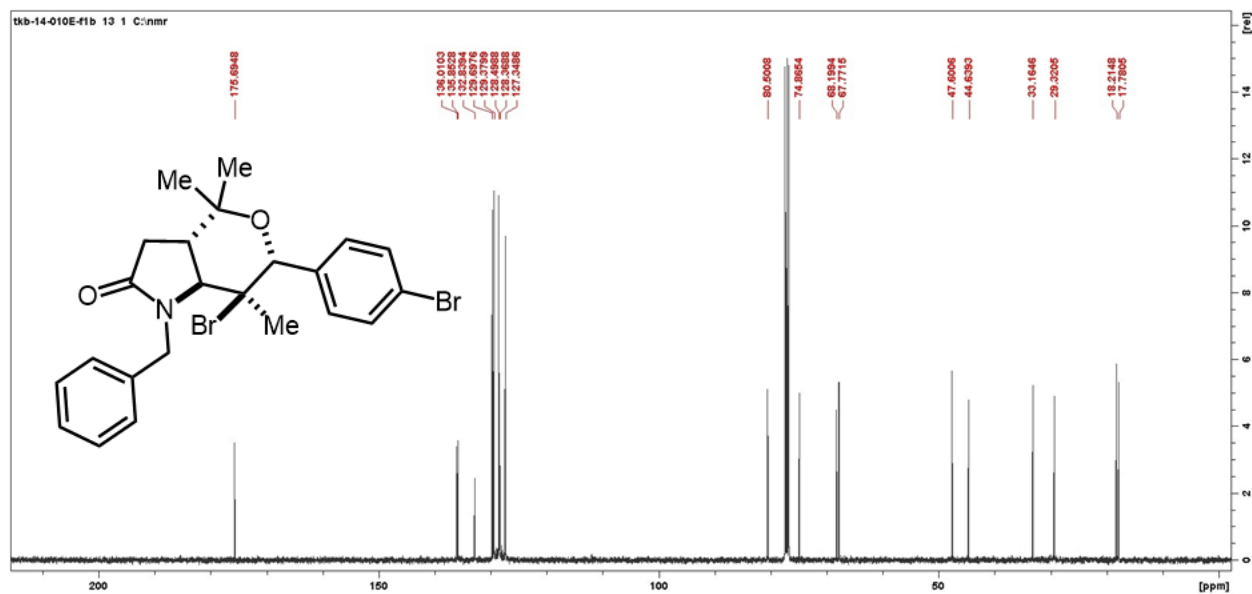

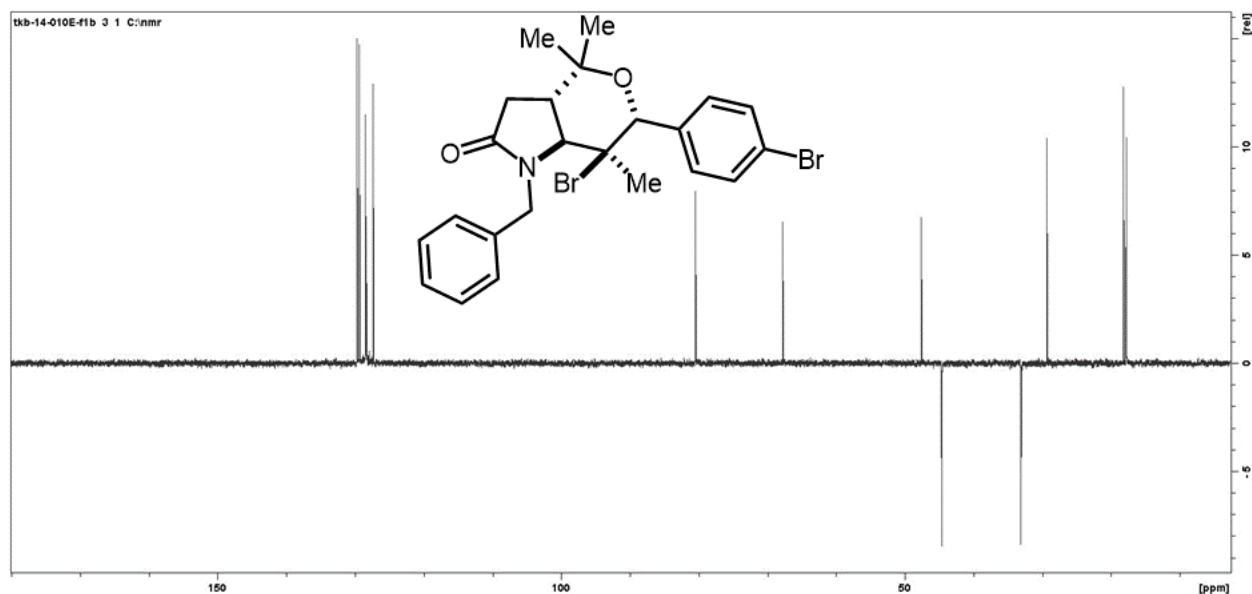

### Compound 4s

Prepared in 1.0 mmol scale using **General Procedure A**. Purification: Flash chromatography on silica eluting with hexane/acetone (90:10 to 70:30). Amorphous solid. Yield = 398.2 mg, 90%, 95:5 dr (*anti:syn*).  $^1\text{H}$  NMR (400 MHz,  $\text{CDCl}_3$ )  $\delta$  7.45 (q,  $J = 3.0$  Hz, 2H), 7.30 (d,  $J = 4.4$  Hz, 3H), 7.16 – 7.08 (m, 4H), 5.00 (d,  $J = 15.5$  Hz, 1H), 4.89 (s, 1H), 4.68 (d,  $J = 15.5$  Hz, 1H), 4.23 – 4.12 (m, 1H), 2.47 – 2.28 (m, 5H), 2.13 (dd,  $J = 14.7, 12.8$  Hz, 1H), 1.48 (s, 3H), 1.33 (s, 6H).  $^{13}\text{C}$  NMR (101 MHz,  $\text{CDCl}_3$ )  $\delta$  175.63, 136.49, 135.99, 134.25, 129.71, 129.00, 128.28, 127.78, 127.29, 80.49, 74.85, 68.05, 67.55, 47.57, 44.88, 33.24, 29.33, 21.09, 18.17, 17.77. **HRMS-ESI<sup>+</sup>** ( $m/z$ ): calc for  $\text{C}_{24}\text{H}_{28}\text{BrNO}_2$   $[\text{M}]^+$  441.1303, found 441.1306.

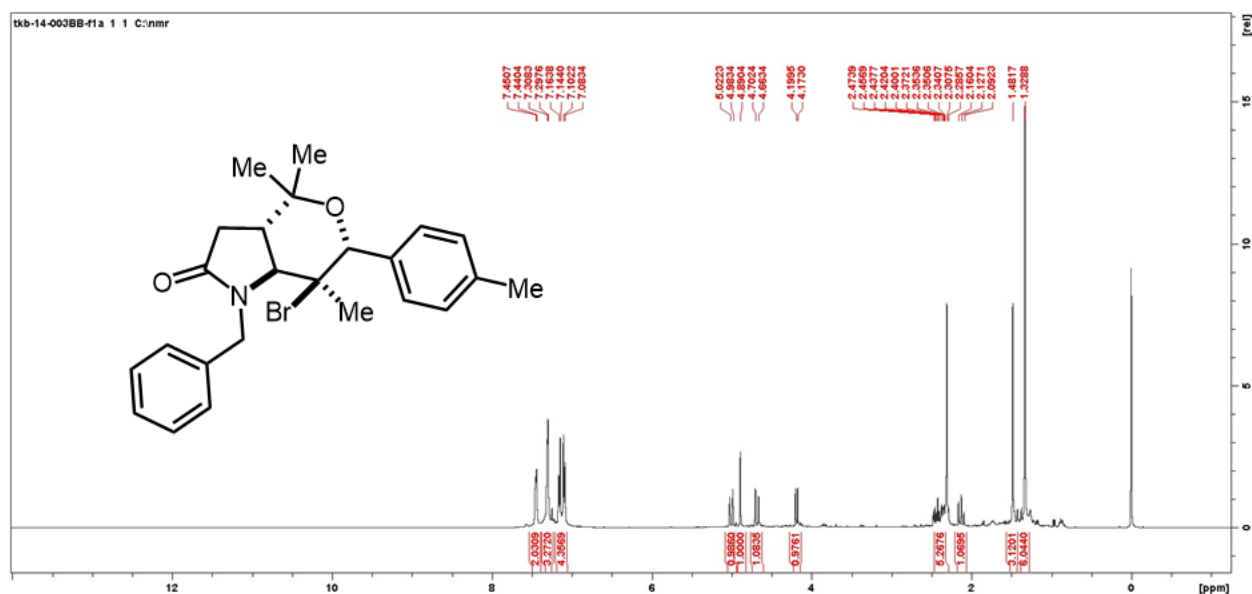

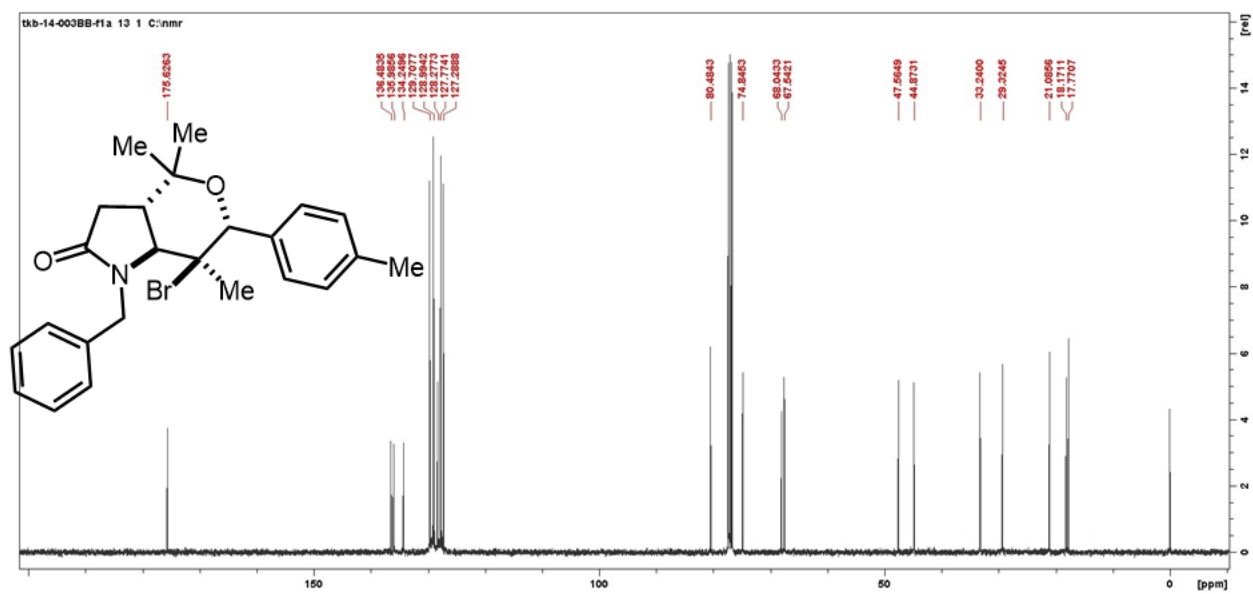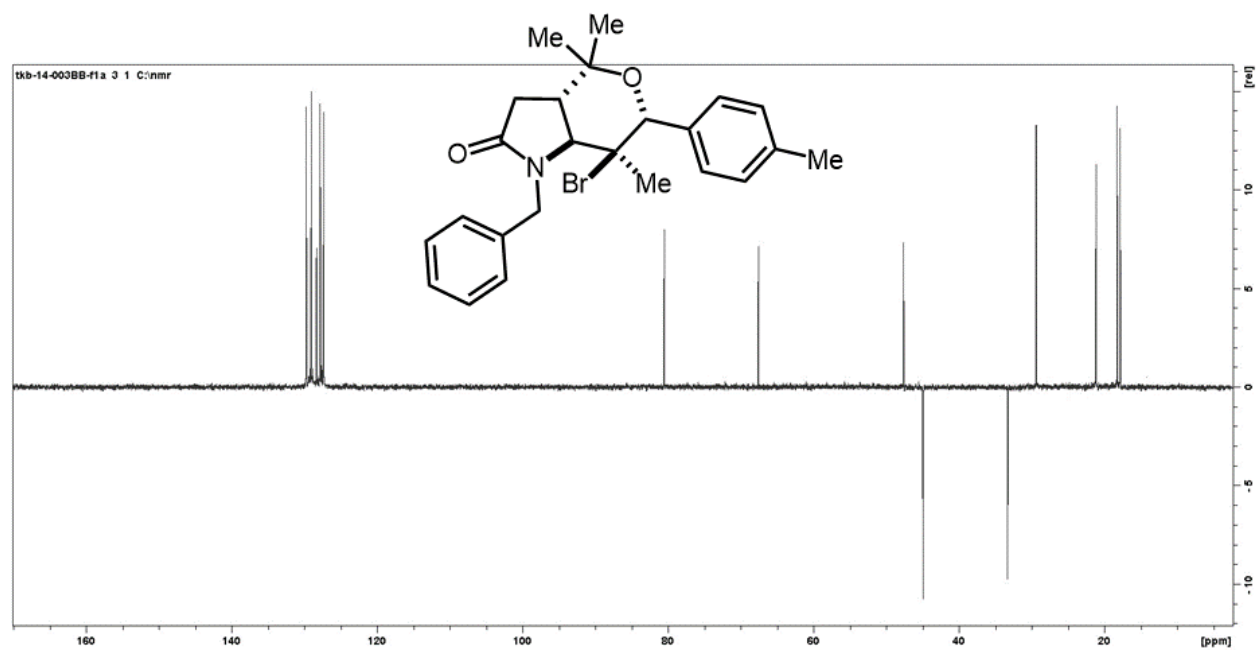

COSY 45

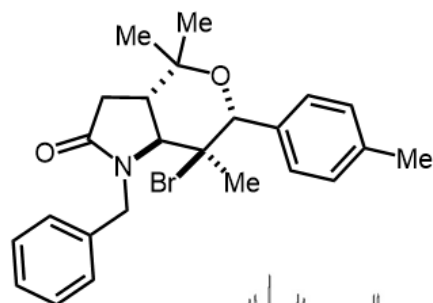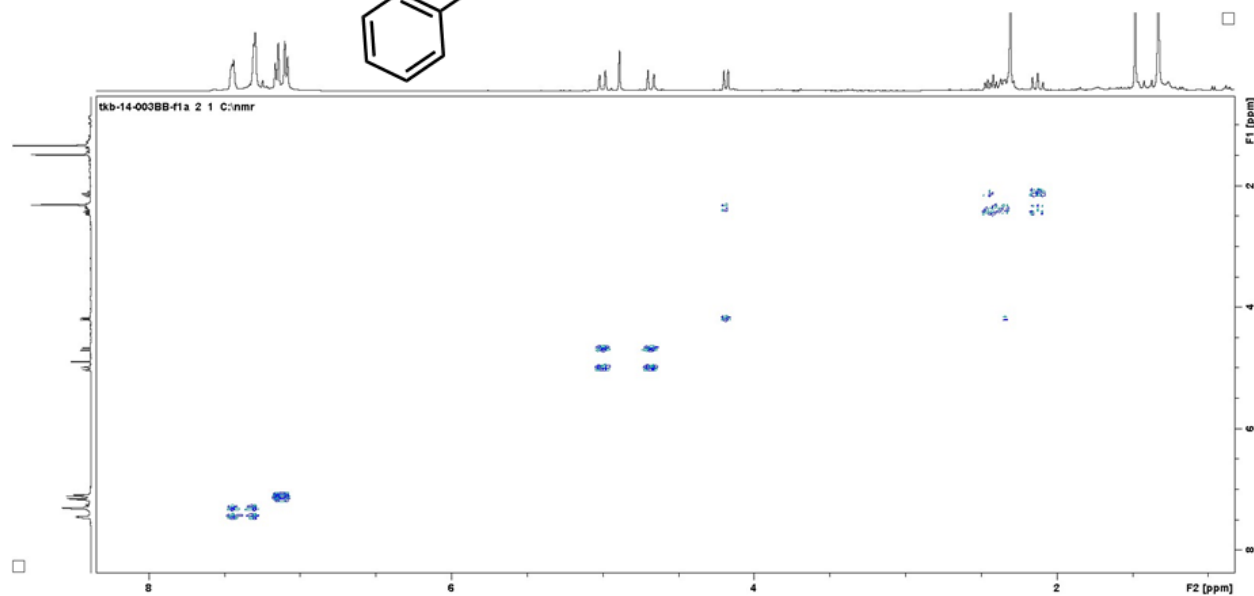

HSQC

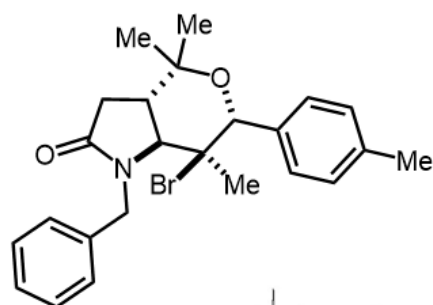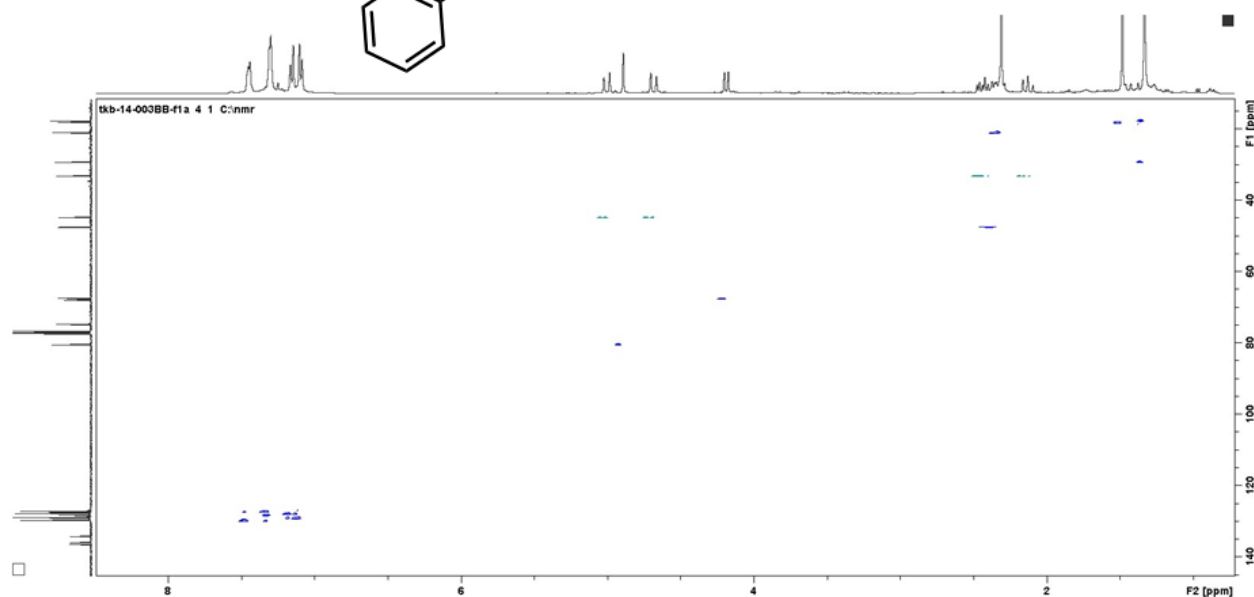

**Compound 4t**

Prepared in 1.0 mmol scale using **General Procedure A**. Purification: Flash chromatography on silica eluting with hexane/acetone (90:10 to 70:30). Amorphous solid. Yield = 461.4 mg, 84%, 95:5 dr (*anti*:*syn*).  $^1\text{H}$  NMR (400 MHz,  $\text{CDCl}_3$ )  $\delta$  7.56 – 7.53 (m, 2H), 7.38 – 7.22 (m, 7H), 4.86 (s, 1H), 4.32 (d,  $J = 9.7$  Hz, 1H), 4.04 (dddd,  $J = 37.6, 13.7, 10.6, 5.7$  Hz, 1H), 3.66 (ddd,  $J = 13.8, 11.2, 4.8$  Hz, 1H), 3.09 (tt,  $J = 10.4, 5.2$  Hz, 1H), 2.88 – 2.72 (m, 1H), 2.60 – 2.45 (m, 1H), 2.38 – 2.26 (m, 1H), 2.26 – 1.98 (m, 2H), 1.94 – 1.77 (m, 1H), 1.64 (s, 3H), 1.59 – 1.24 (m, 2H), 1.05 – 0.86 (m, 6H).  $^{13}\text{C}$  NMR (101 MHz,  $\text{CDCl}_3$ )  $\delta$  175.23, 137.24, 136.22, 132.20, 130.42, 130.38, 130.32, 130.11, 129.68, 128.66, 128.61, 128.36, 127.77, 127.73, 127.36, 86.16, 79.99, 68.80, 66.53, 43.66, 43.21, 32.82, 32.08, 29.68, 21.97, 18.13, 7.35, 6.61. **HRMS-EI<sup>+</sup>** ( $m/z$ ): calc for  $\text{C}_{26}\text{H}_{31}\text{Br}_2\text{NO}_2$  [ $\text{M}$ ]<sup>+</sup> 547.0722, found 547.0726.

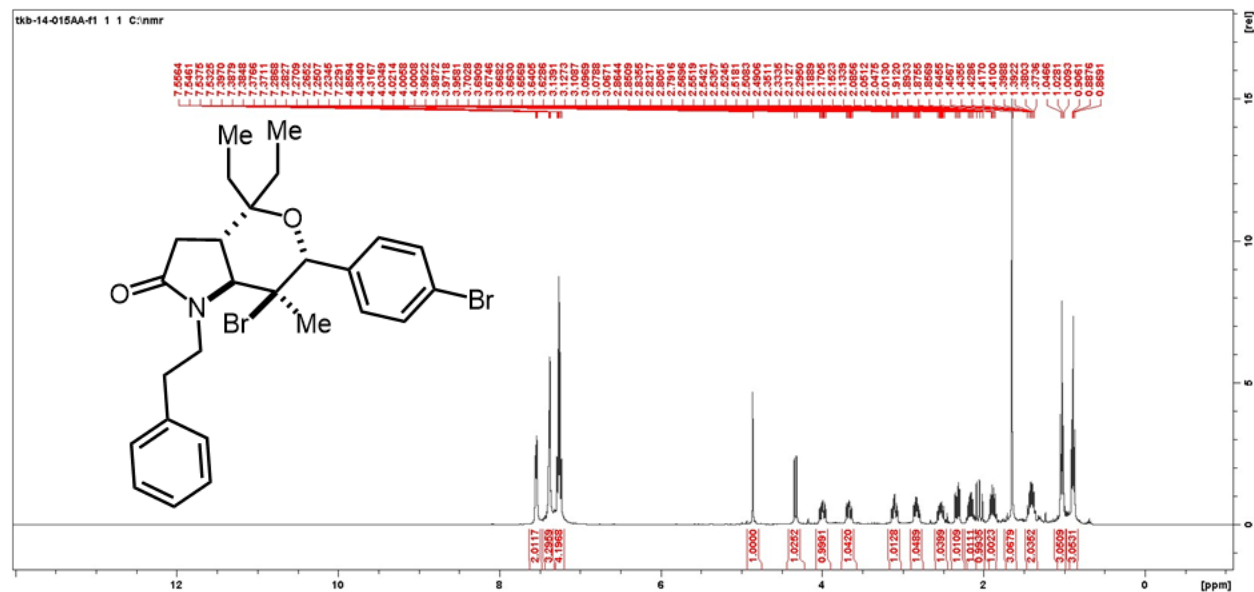

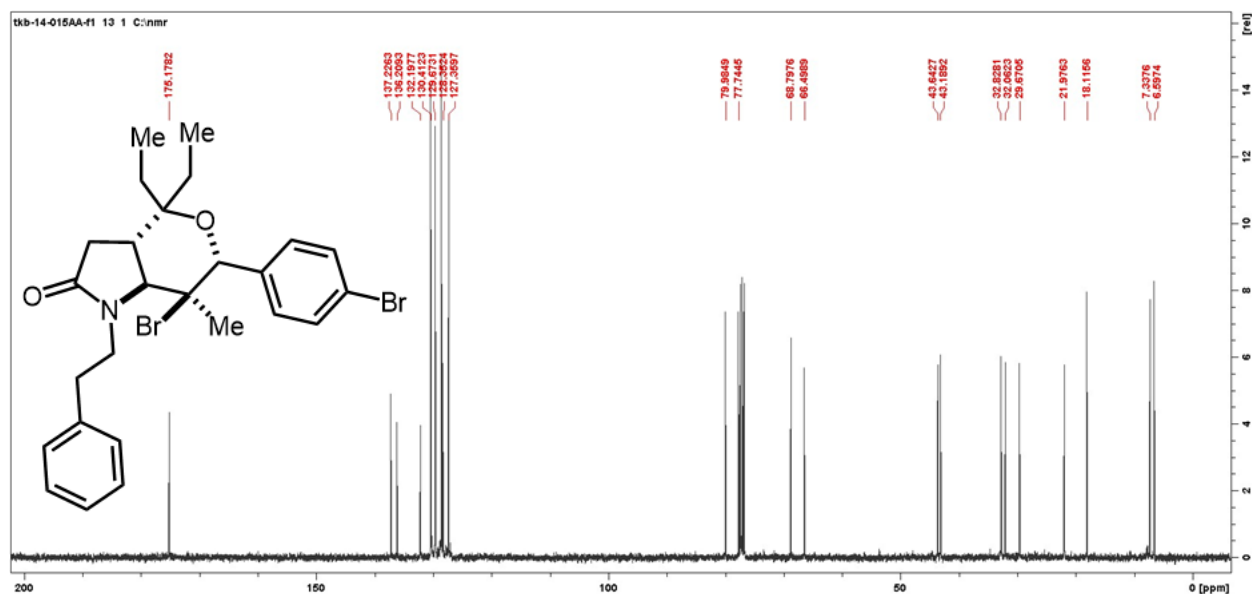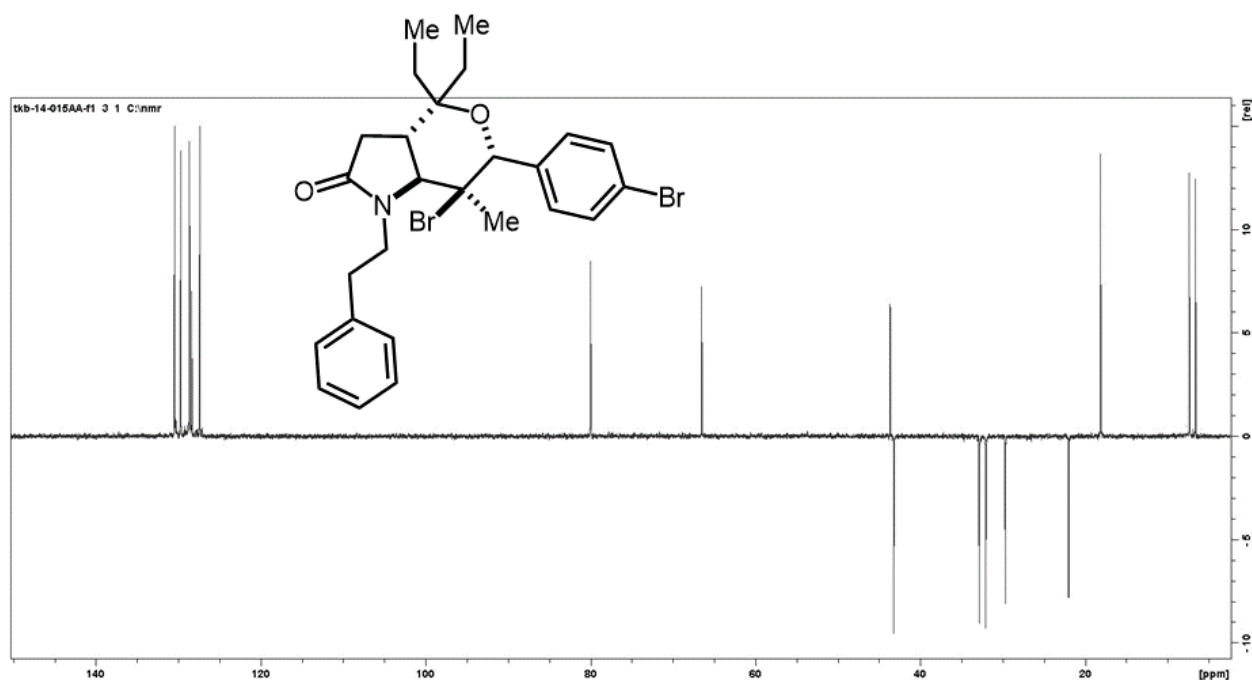

### Compound 4u

Prepared in 1.0 mmol scale using **General Procedure A**. Purification: Flash chromatography on silica eluting with hexane/acetone (90:10 to 70:30). Amorphous solid. Yield = 466.7 mg, 89%, 95:5 dr (*anti:syn*).  $^1\text{H}$  NMR (400 MHz,  $\text{CDCl}_3$ )  $\delta$  7.58 – 7.42 (m, 5H), 7.34 – 7.31 (m, 3H), 5.10 (d,  $J = 15.8$  Hz, 1H), 4.84 (d,  $J = 15.8$  Hz, 1H), 4.77 (s, 1H), 4.33 (d,  $J = 11.0$  Hz, 1H), 2.63 (ddd,  $J = 13.5, 10.8, 7.0$  Hz, 1H), 2.47 (dd,  $J = 15.5, 7.0$  Hz, 1H), 2.27 – 2.06 (m, 2H), 1.90 (dq,  $J = 14.9, 7.4$  Hz, 1H), 1.49 – 1.39 (m, 5H), 1.04 (t,  $J = 6.8$  Hz, 3H), 0.86 (t,  $J = 6.8$  Hz, 3H).  $^{13}\text{C}$  NMR (101

MHz, CDCl<sub>3</sub>) δ 176.02, 138.65, 136.11, 131.33, 131.31, 130.84, 130.53, 129.61, 128.84, 128.31, 127.29, 125.48, 124.83, 124.79, 124.76, 123.93, 123.89, 123.85, 79.93, 68.01, 67.62, 45.01, 43.64, 32.64, 29.68, 21.96, 18.20, 7.34, 6.52. **HRMS-EI<sup>+</sup>** (*m/z*): calc for C<sub>26</sub>H<sub>29</sub>BrF<sub>3</sub>NO<sub>2</sub> [M]<sup>+</sup> 523.1334, found 523.1338.

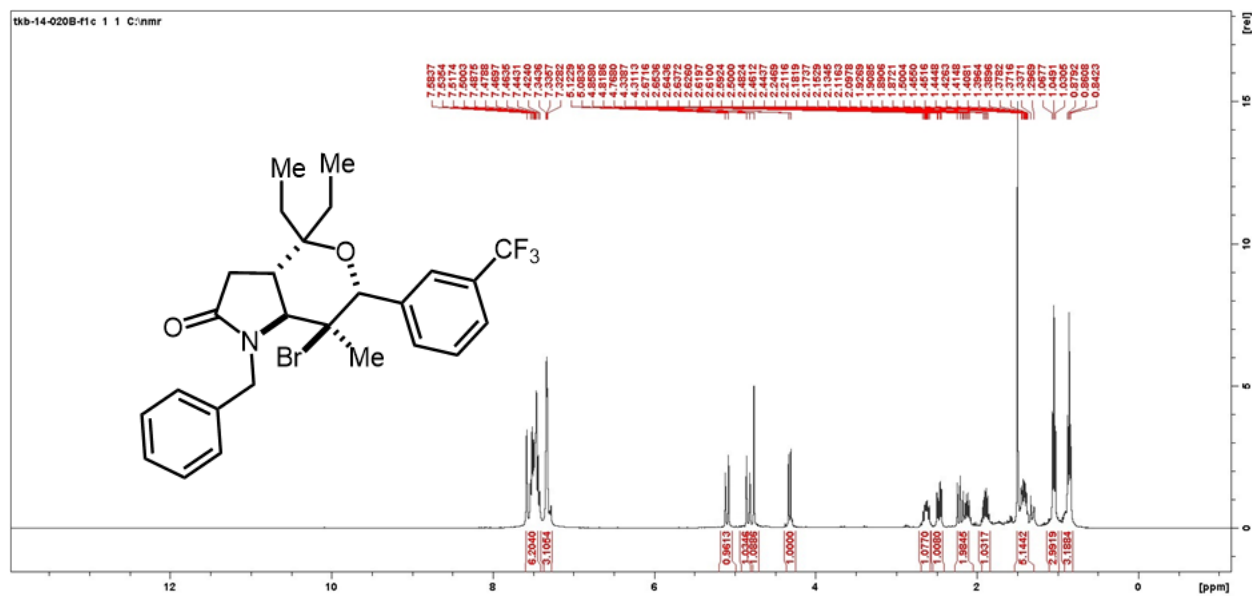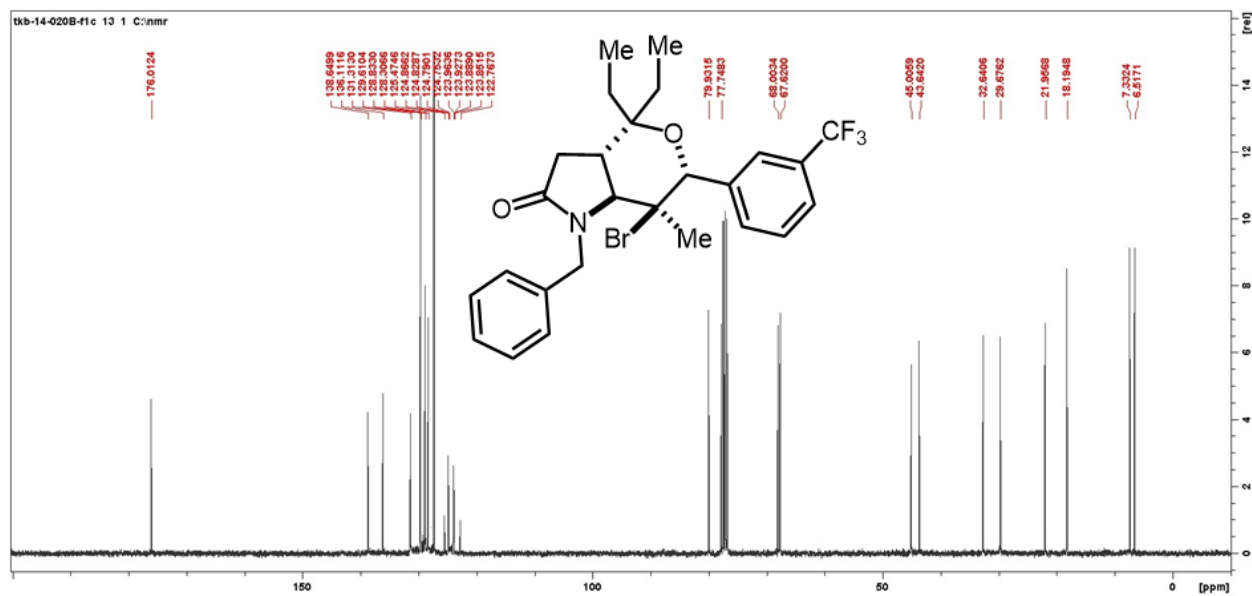

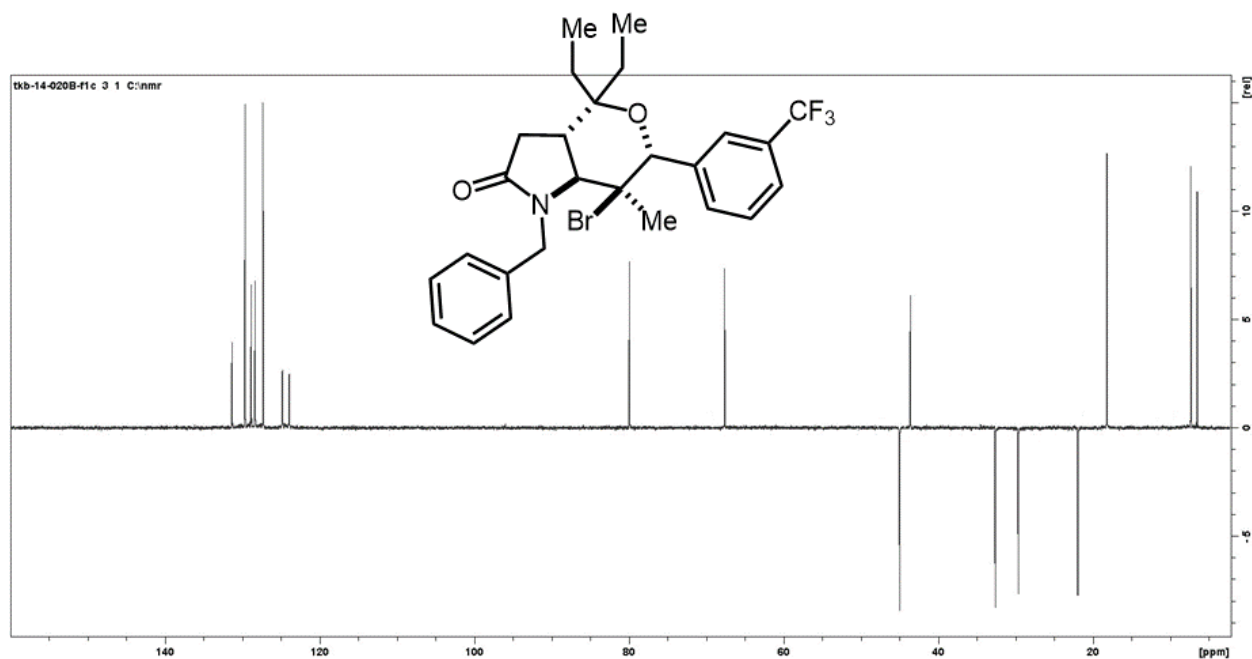<sup>19</sup>F NMR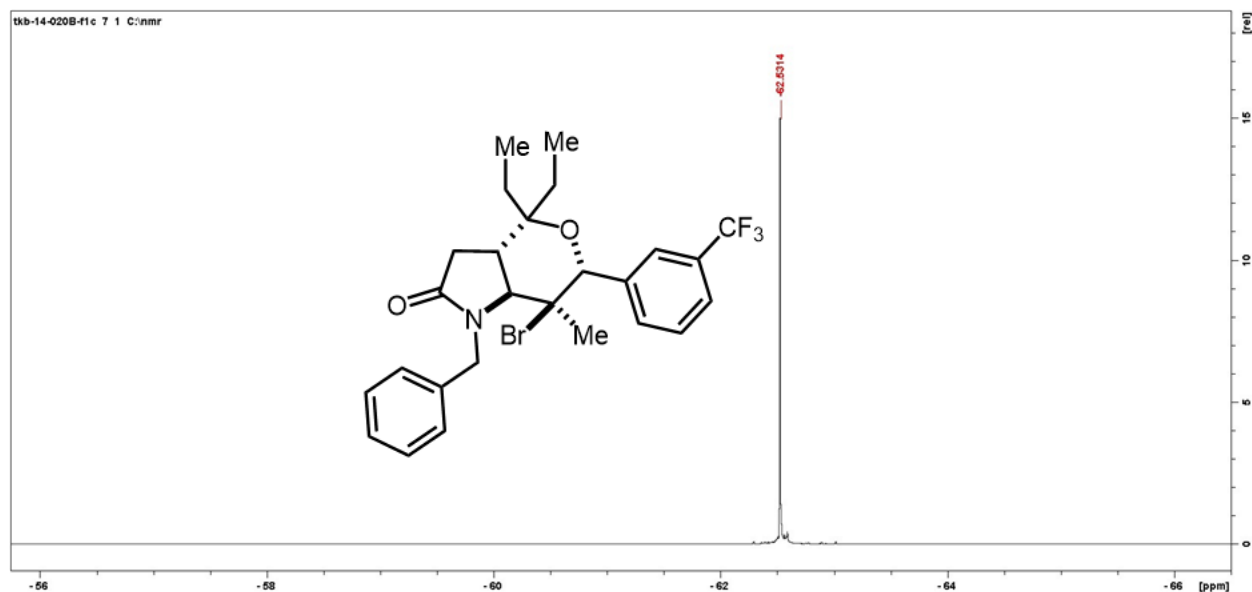**Compound 4v**

Prepared in 1.0 mmol scale using **General Procedure A**. Purification: Flash chromatography on silica eluting with hexane/acetone (90:10 to 70:30). Amorphous solid. Yield = 308.0 mg, 81%, 95:5 dr (*anti:syn*). <sup>1</sup>H NMR (400 MHz, CDCl<sub>3</sub>) δ 7.43 – 7.32 (m, 5H), 5.36 (s, 1H), 4.89 (d, J = 9.4 Hz, 1H), 4.64 (s, 1H), 4.49 – 4.40 (m, 1H), 2.83 (dd, J = 17.9, 10.5 Hz, 1H), 2.41 (d, J = 10.3 Hz, 1H), 1.98 – 1.82 (m, 1H), 1.47 (s, 9H), 1.28 (s, 3H), 1.17 (s, 3H). <sup>13</sup>C NMR (101 MHz, CDCl<sub>3</sub>)



$\delta$  174.89, 140.80, 128.37, 128.33, 128.31, 127.26, 75.59, 73.55, 65.37, 59.96, 54.92, 42.76, 35.93, 28.74, 28.40, 23.40. **HRMS-EI<sup>+</sup>** ( $m/z$ ): calc for C<sub>19</sub>H<sub>26</sub>BrNO<sub>2</sub> [M]<sup>+</sup> 379.1147, found 379.1144.

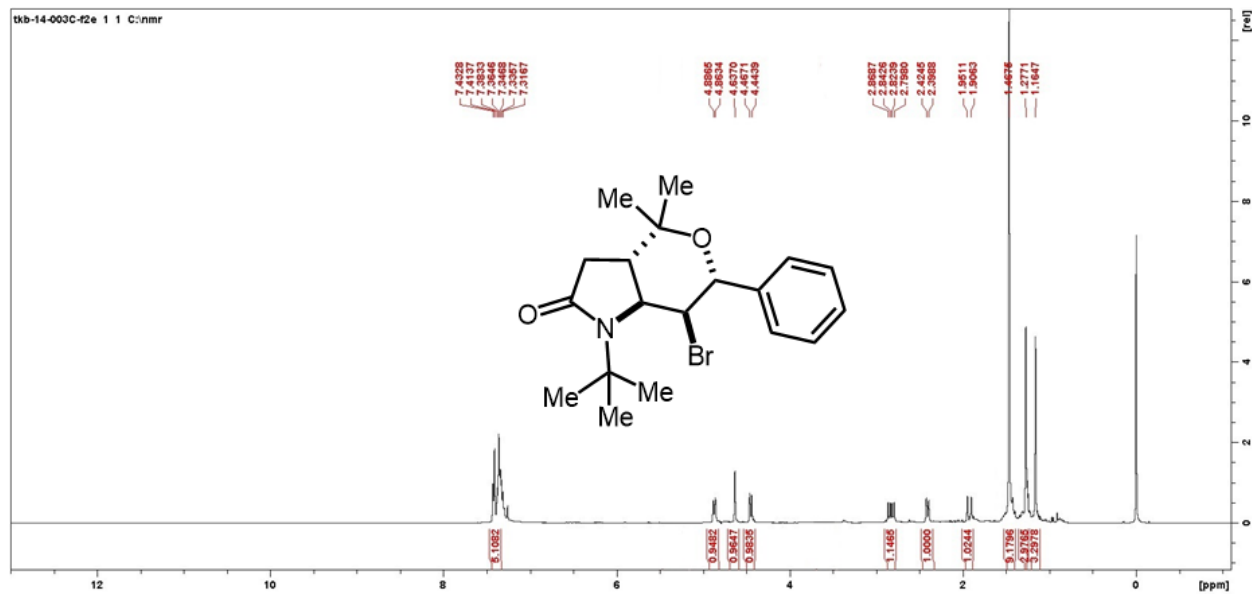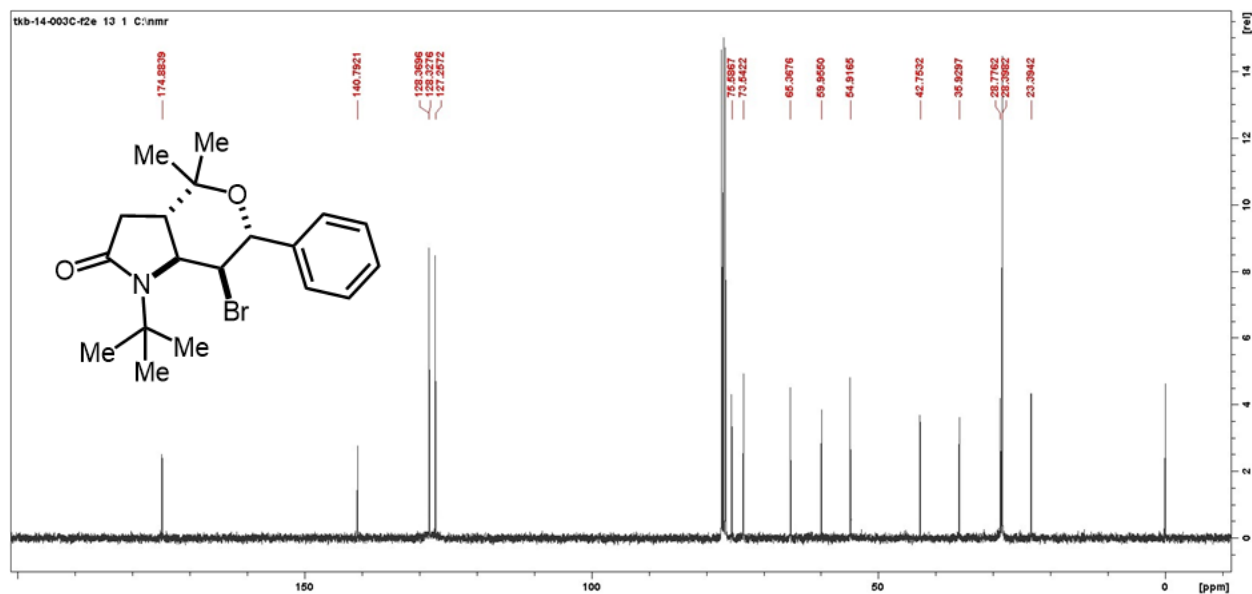

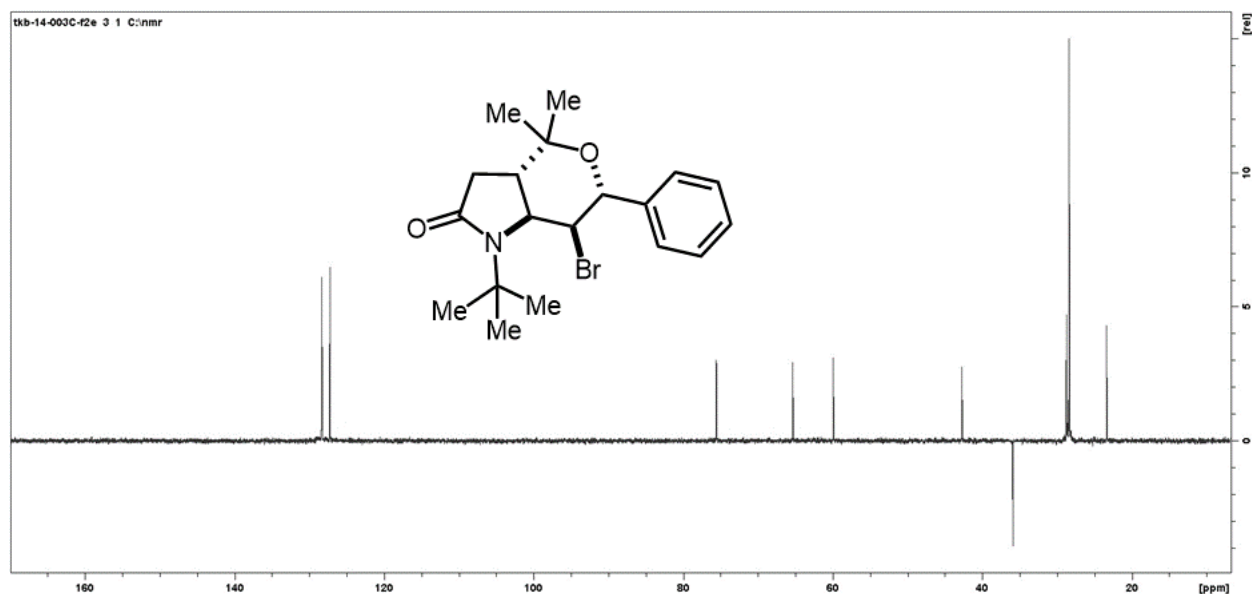

### Compound 4w

Prepared in 1.0 mmol scale using **General Procedure A**. Purification: Flash chromatography on silica eluting with hexane/acetone (90:10 to 50:50). Amorphous solid. Yield = 324.1 mg, 79%, 95:5 dr (*anti:syn*).  $^1\text{H}$  NMR (400 MHz,  $\text{CDCl}_3$ )  $\delta$  7.38 – 7.27 (m, 2H), 7.00 – 6.87 (m, 2H), 5.22 (m, 1H), 4.88 (d,  $J = 8.0$  Hz, 1H), 4.54 (s, 1H), 3.87 (s, 3H), 2.86 (qd,  $J = 17.1, 10.4$  Hz, 1H), 2.55 – 2.42 (m, 1H), 1.95 (dd,  $J = 17.9, 2.4$  Hz, 1H), 1.40 (s, 9H), 1.27 (s, 3H), 1.14 (s, 3H).  $^{13}\text{C}$  NMR (101 MHz,  $\text{CDCl}_3$ )  $\delta$  174.99, 156.68, 129.45, 128.68, 128.59, 120.92, 110.97, 73.30, 72.84, 63.05, 59.83, 55.55, 54.70, 43.61, 36.08, 28.71, 28.25, 23.57. **HRMS-EI $^+$**  ( $m/z$ ): calc for  $\text{C}_{20}\text{H}_{28}\text{BrNO}_3$   $[\text{M}]^+$  409.1253, found 409.1255.

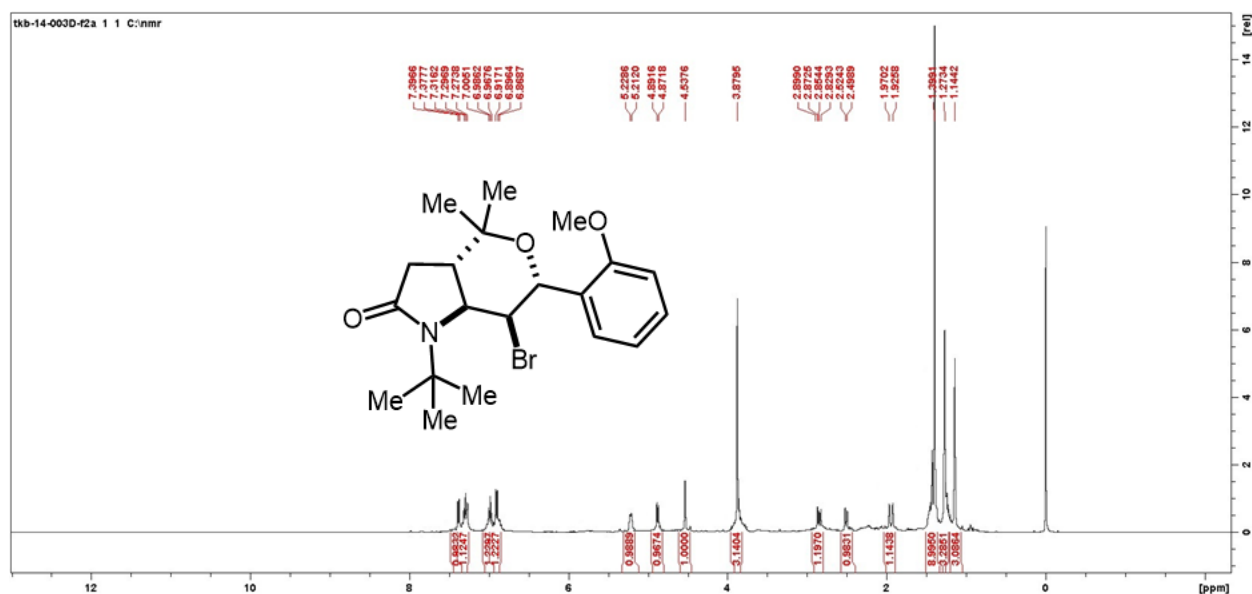

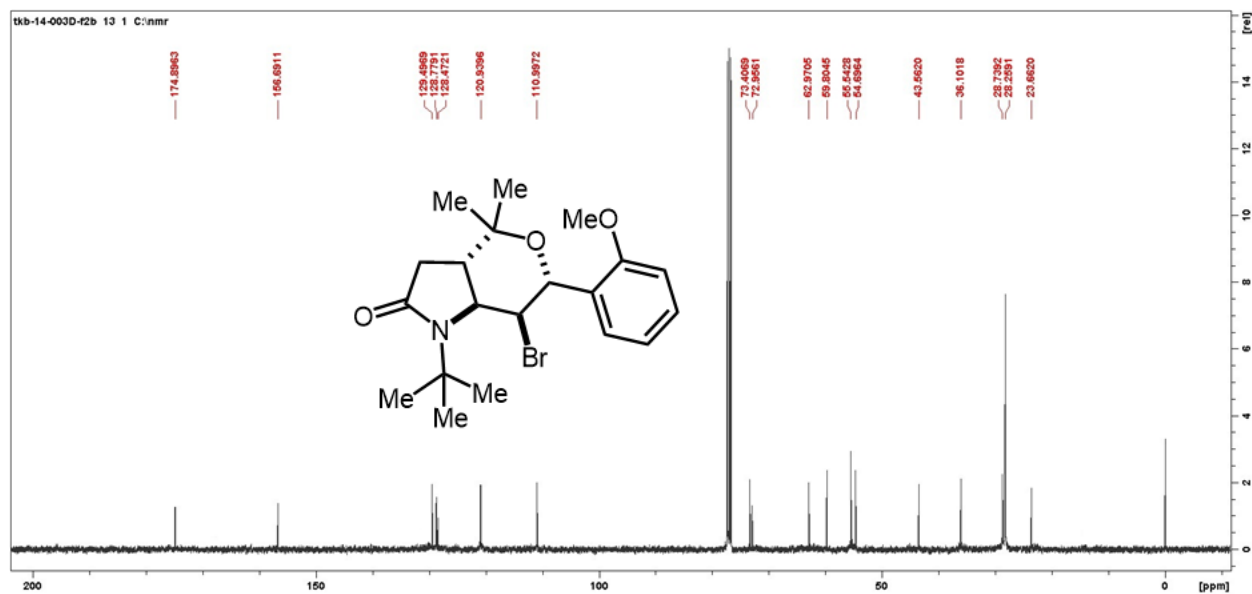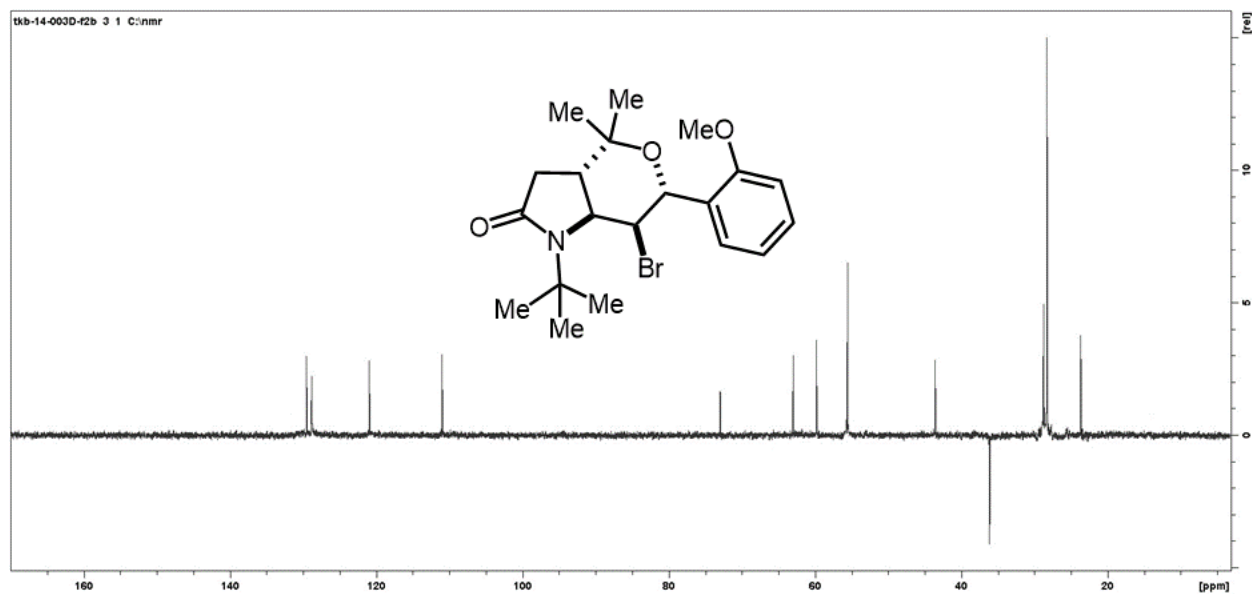

### Compound 4x

Prepared in 1.0 mmol scale using **General Procedure A**. Purification: Flash chromatography on silica eluting with hexane/acetone (90:10 to 60:40). Yellowish oil. Yield = 304.3 mg, 70%, 95:5 dr (*anti:syn*).  $^1\text{H}$  NMR (400 MHz,  $\text{CDCl}_3$ )  $\delta$  7.48 – 7.40 (m, 2H), 7.40 – 7.20 (m, 7H), 5.01 (d,  $J$  = 15.7 Hz, 1H), 4.78 – 4.68 (m, 2H), 4.28 (dd,  $J$  = 11.0, 3.7 Hz, 1H), 4.00 (d,  $J$  = 10.0 Hz, 1H), 3.69 (t,  $J$  = 10.8 Hz, 1H), 2.65 – 2.49 (m, 2H), 2.31 – 2.17 (m, 1H), 1.54 (s, 3H).  $^{13}\text{C}$  NMR (101 MHz,  $\text{CDCl}_3$ )  $\delta$  176.18, 135.95, 135.42, 132.85, 129.45, 129.27, 128.53, 128.52, 127.46, 87.14,

77.05, 76.73, 72.52, 70.10, 66.39, 44.58, 39.77, 33.17, 18.69. **HRMS-EI<sup>+</sup>** (*m/z*): calc for C<sub>21</sub>H<sub>21</sub>BrClNO<sub>2</sub> [M]<sup>+</sup> 433.0444, found 433.0449.

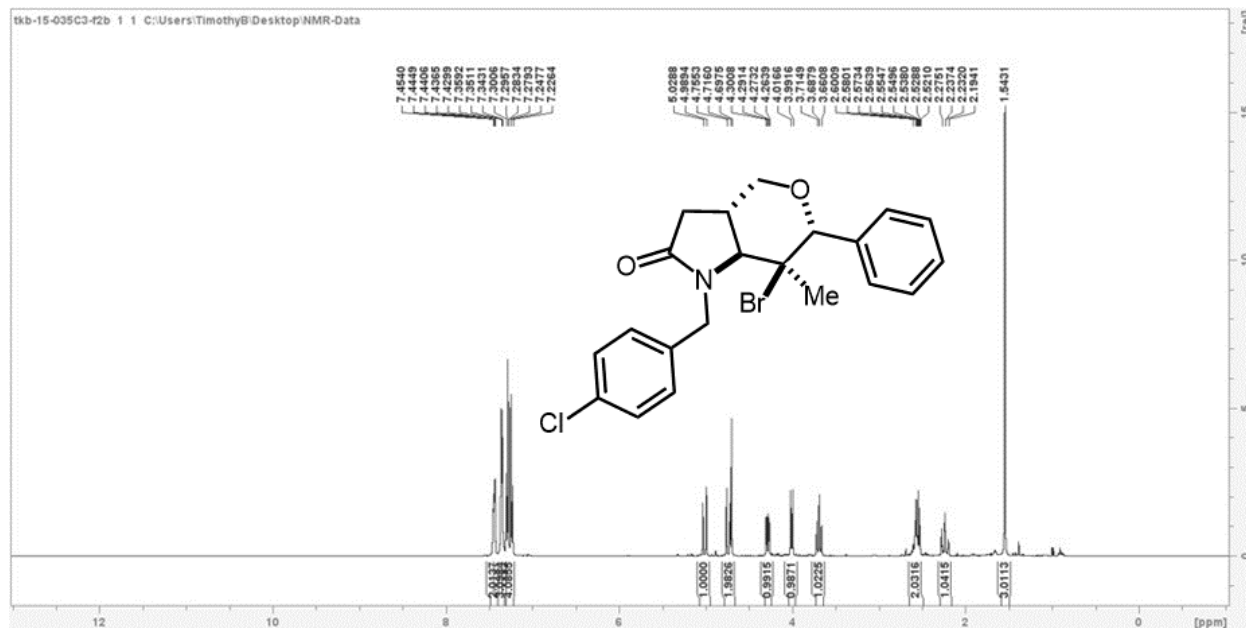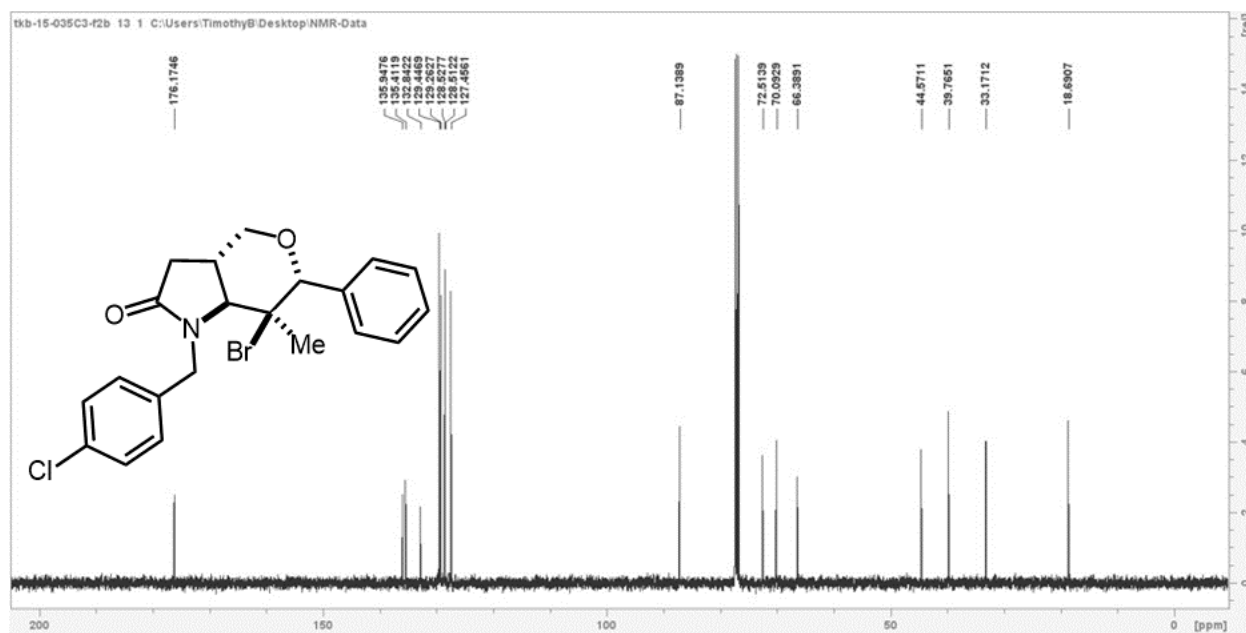

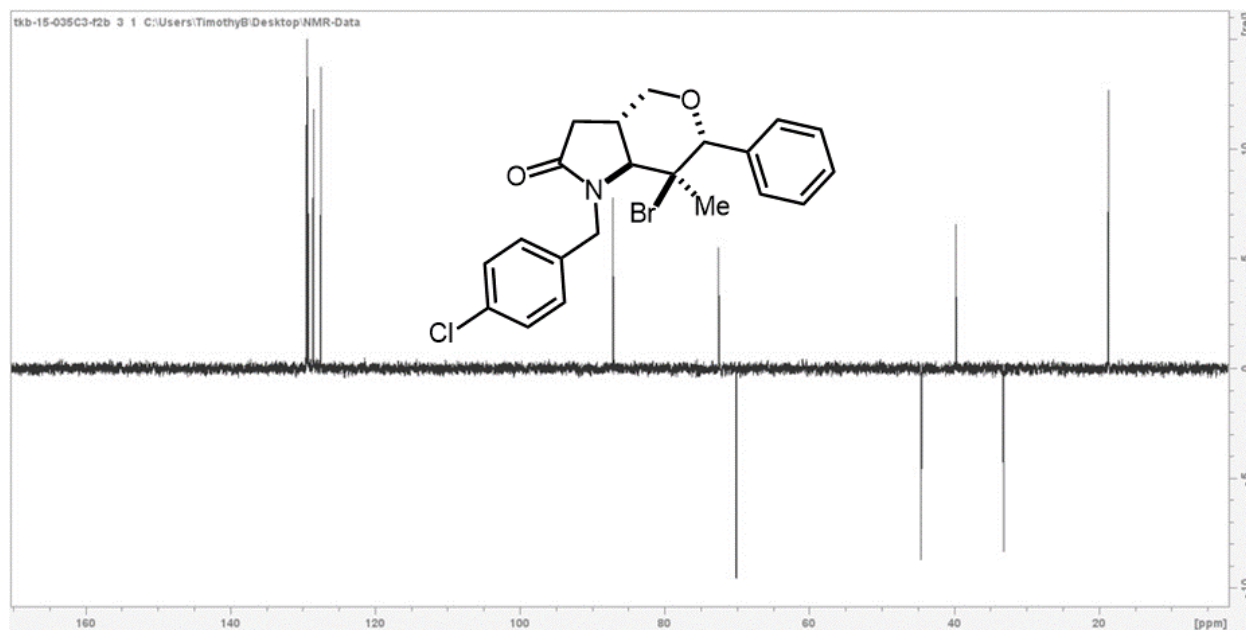

### Compound 4y

Prepared in 1.0 mmol scale using **General Procedure A**. Purification: Flash chromatography on silica eluting with hexane/acetone (90:10 to 70:30). Yellowish oil. Yield = 281.7 mg, 68%, 95:5 dr (*anti:syn*).  $^1\text{H}$  NMR (400 MHz,  $\text{CDCl}_3$ )  $\delta$  7.46 – 7.36 (m, 2H), 7.30 (dd,  $J = 5.0, 2.0$  Hz, 3H), 7.22 (d,  $J = 4.4$  Hz, 4H), 7.13 (dt,  $J = 8.8, 4.3$  Hz, 1H), 4.71 (s, 1H), 4.19 (dd,  $J = 10.9, 3.9$  Hz, 1H), 3.98 – 3.85 (m, 2H), 3.69 – 3.51 (m, 2H), 3.03 (td,  $J = 12.1, 4.7$  Hz, 1H), 2.89 – 2.70 (m, 1H), 2.49 – 2.29 (m, 2H), 1.62 – 1.55 (m, 1H).  $^{13}\text{C}$  NMR (101 MHz,  $\text{CDCl}_3$ )  $\delta$  175.50, 138.71, 135.54, 129.52, 129.04, 128.56, 128.49, 127.51, 126.41, 87.23, 71.63, 70.17, 66.93, 43.45, 39.74, 33.34, 32.58, 18.53. **HRMS-EI<sup>+</sup>** ( $m/z$ ): calc for  $\text{C}_{22}\text{H}_{24}\text{BrNO}_2$   $[\text{M}]^+$  413.0990, found 413.0994.

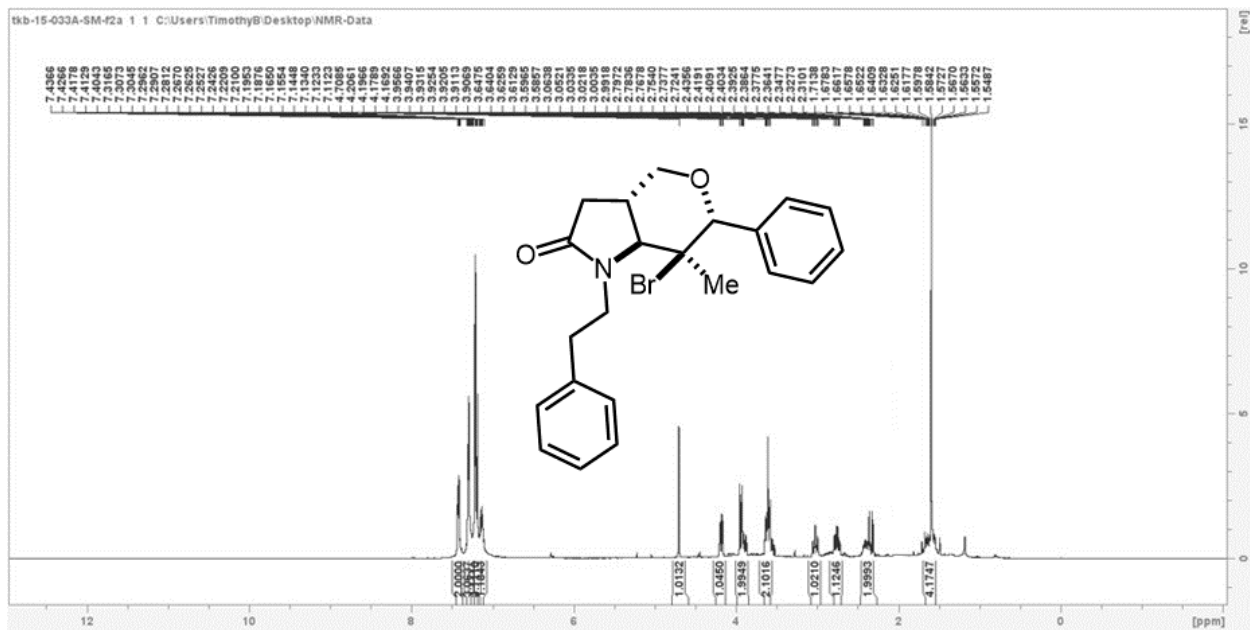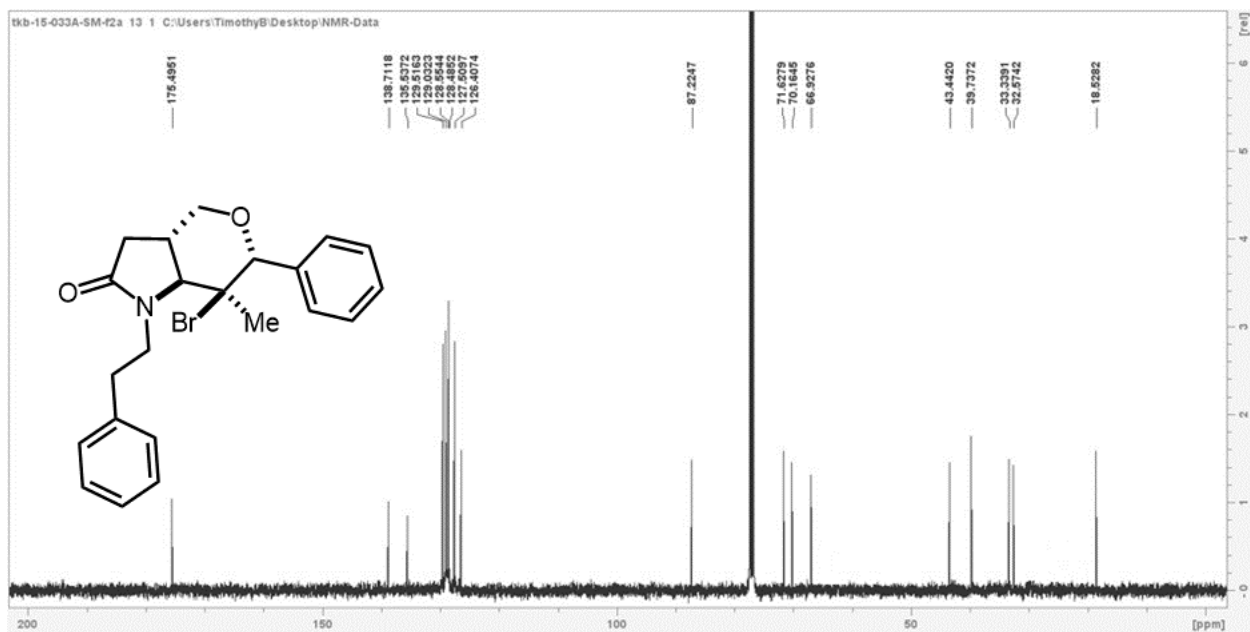

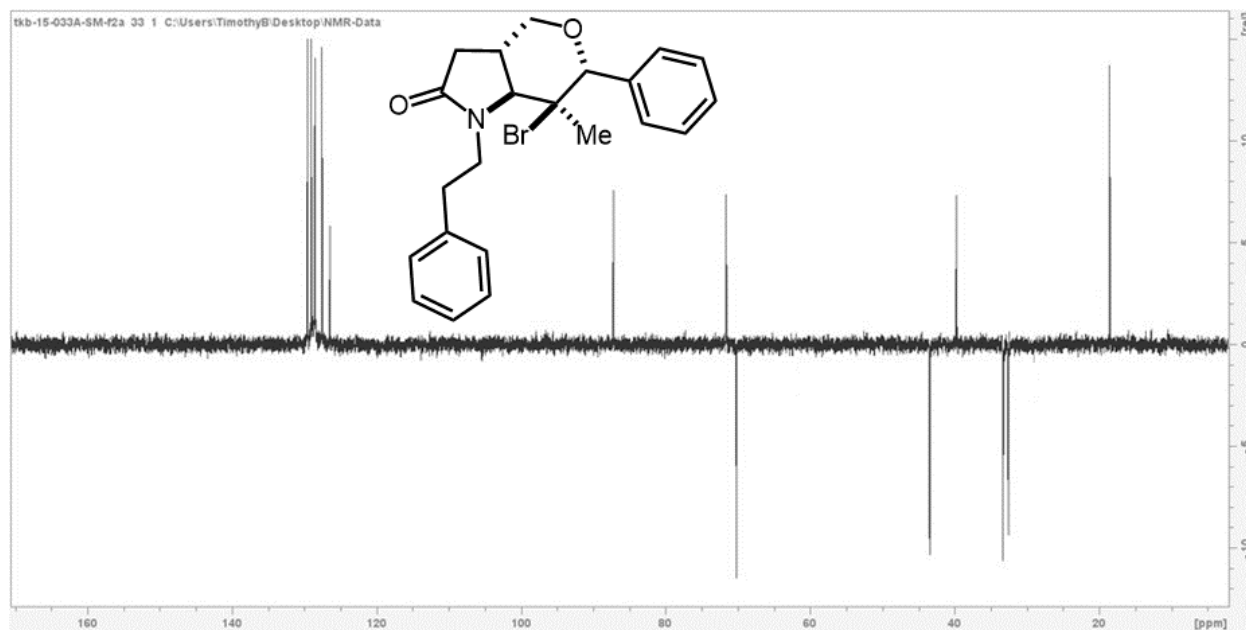

### Compound 4z

Prepared in 1.0 mmol scale using **General Procedure A**. Purification: Flash chromatography on silica eluting with hexane/acetone (90:10 to 50:50). Yellowish oil. Yield = 195.2 mg, 53%, 95:5 dr (*anti:syn*).  $^1\text{H}$  NMR (400 MHz,  $\text{CDCl}_3$ )  $\delta$  7.35 (d,  $J = 8.0$  Hz, 2H), 6.95 (d,  $J = 8.0$  Hz, 2H), 5.19 (d,  $J = 3.2$  Hz, 1H), 4.95 (t,  $J = 3.3$  Hz, 1H), 4.14 – 4.02 (m, 1H), 3.95 – 3.85 (m, 1H), 3.85 (s, 3H), 3.81 (dq,  $J = 6.7, 3.2$  Hz, 1H), 3.47 (dd,  $J = 10.4, 3.4$  Hz, 1H), 2.83 (dddd,  $J = 21.3, 10.8, 7.6, 5.3$  Hz, 1H), 2.52 – 2.27 (m, 1H), 2.05 – 1.90 (m, 1H), 1.46 – 1.25 (m, 6H).  $^{13}\text{C}$  NMR (101 MHz,  $\text{CDCl}_3$ )  $\delta$  175.18, 159.36, 130.24, 127.04, 114.42, 80.44, 66.73, 59.61, 55.35, 53.44, 45.58, 34.47, 33.08, 20.12, 19.86. **HRMS-EI<sup>+</sup>** ( $m/z$ ): calc for  $\text{C}_{17}\text{H}_{22}\text{BrNO}_3$   $[\text{M}]^+$  367.0783, found 367.0788.

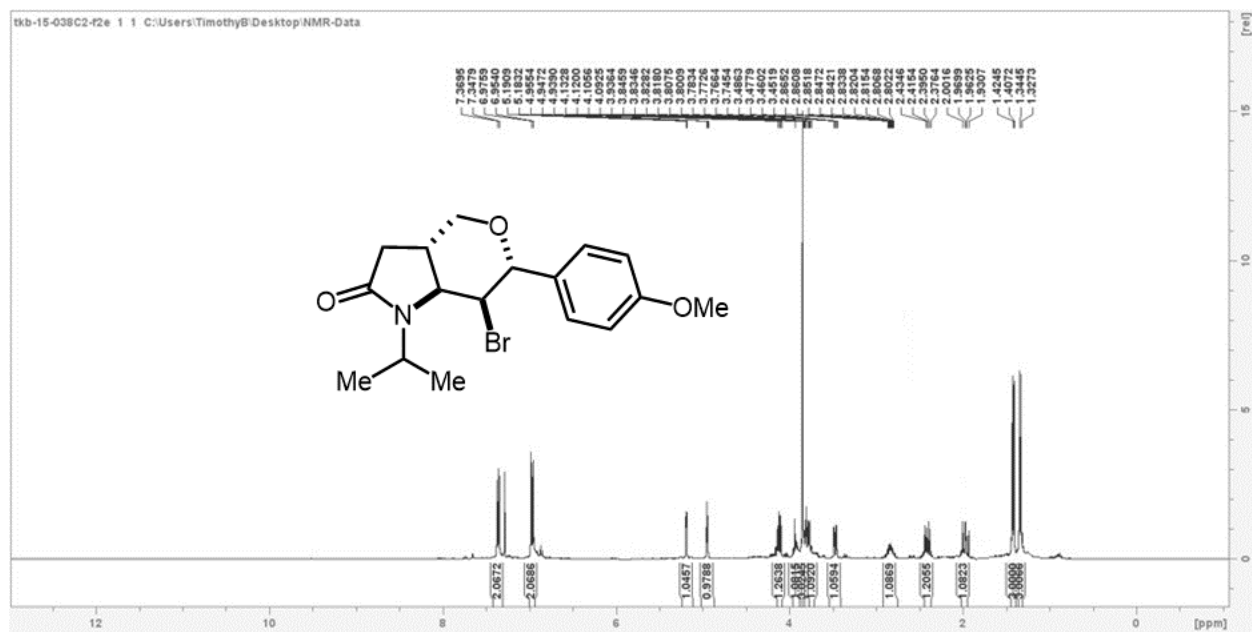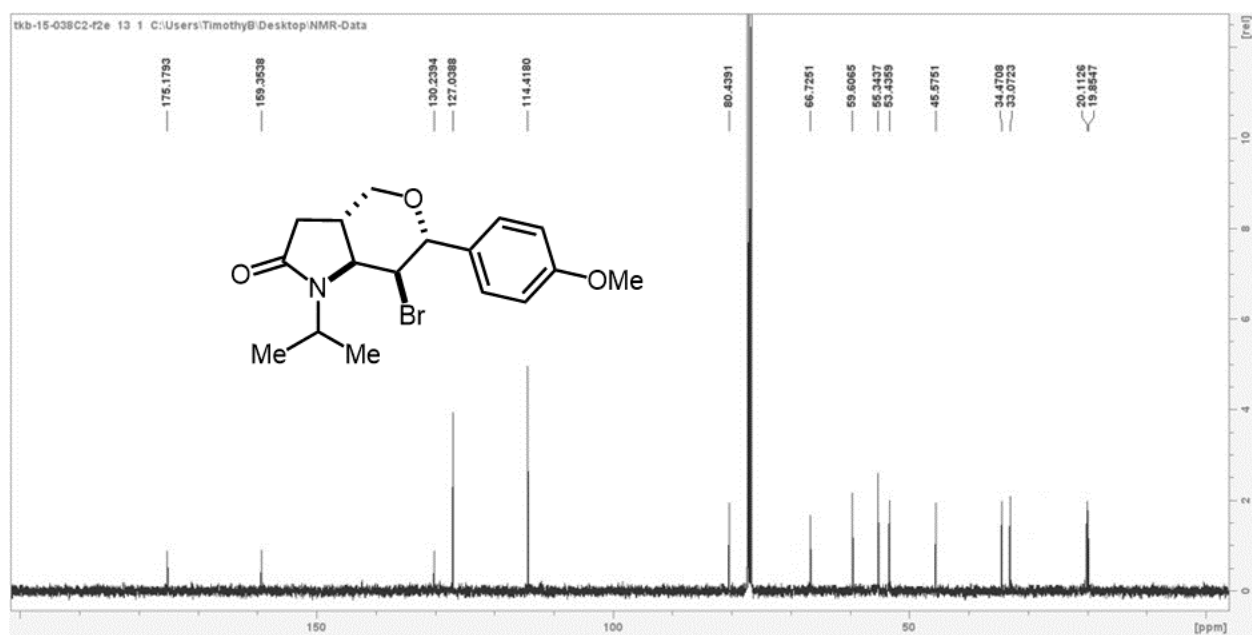



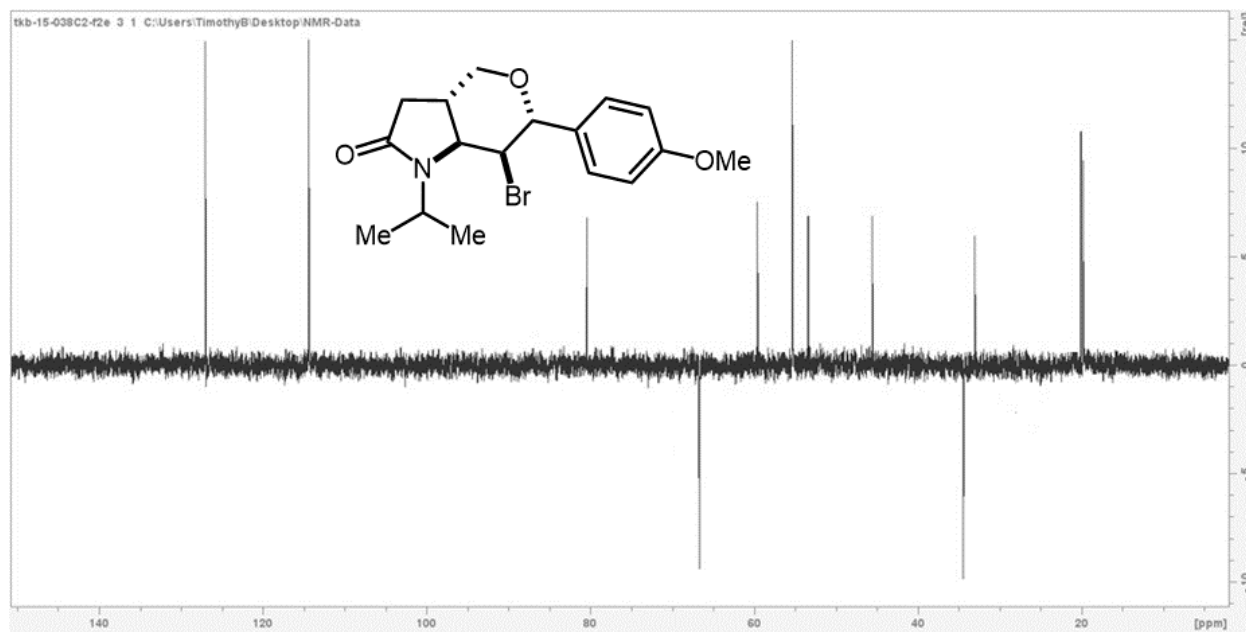

## Valerolactam-fused tetrahydropyrans

## Compound 5a

Prepared in 1.0 mmol scale using **General Procedure A**. Purification: Flash chromatography on silica eluting with hexane/acetone (90:10 to 70:30). Amorphous solid. Yield = 362.8 mg, 82%, 95:5 dr (*anti:syn*).  $^1\text{H}$  NMR (400 MHz,  $\text{CDCl}_3$ )  $\delta$  7.45 (dt,  $J = 5.8, 3.6$  Hz, 2H), 7.30 – 7.26 (m, 3H), 7.19 – 7.12 (m, 4H), 4.96 (s, 1H), 4.52 (d,  $J = 11.1$  Hz, 1H), 2.77 (ddd,  $J = 17.7, 4.6, 2.0$  Hz, 1H), 2.62 (ddd,  $J = 17.6, 13.4, 5.7$  Hz, 1H), 2.36 (s, 3H), 2.10 (td,  $J = 11.8, 2.0$  Hz, 1H), 1.97 – 1.85 (m, 1H), 1.75 (s, 3H), 1.72 – 1.59 (m, 1H), 1.46 (s, 3H), 1.40 (s, 3H).  $^{13}\text{C}$  NMR (101 MHz,  $\text{CDCl}_3$ )  $\delta$  172.51, 139.12, 137.50, 137.19, 130.15, 129.34, 129.20, 128.03, 127.04, 80.34, 75.42, 69.15, 68.27, 47.33, 34.57, 29.39, 22.56, 21.25, 18.09, 18.03. **HRMS-EI<sup>+</sup>** ( $m/z$ ): calc for  $\text{C}_{24}\text{H}_{28}\text{BrNO}_2$  [ $\text{M}$ ]<sup>+</sup> 441.1303, found 441.1307.

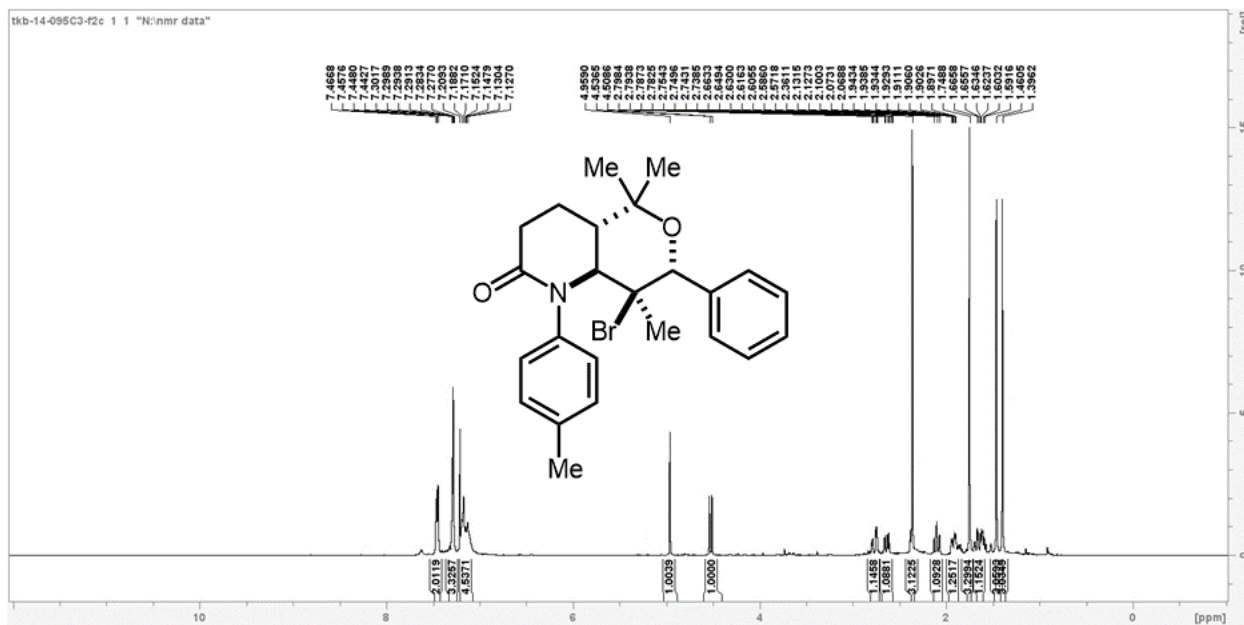

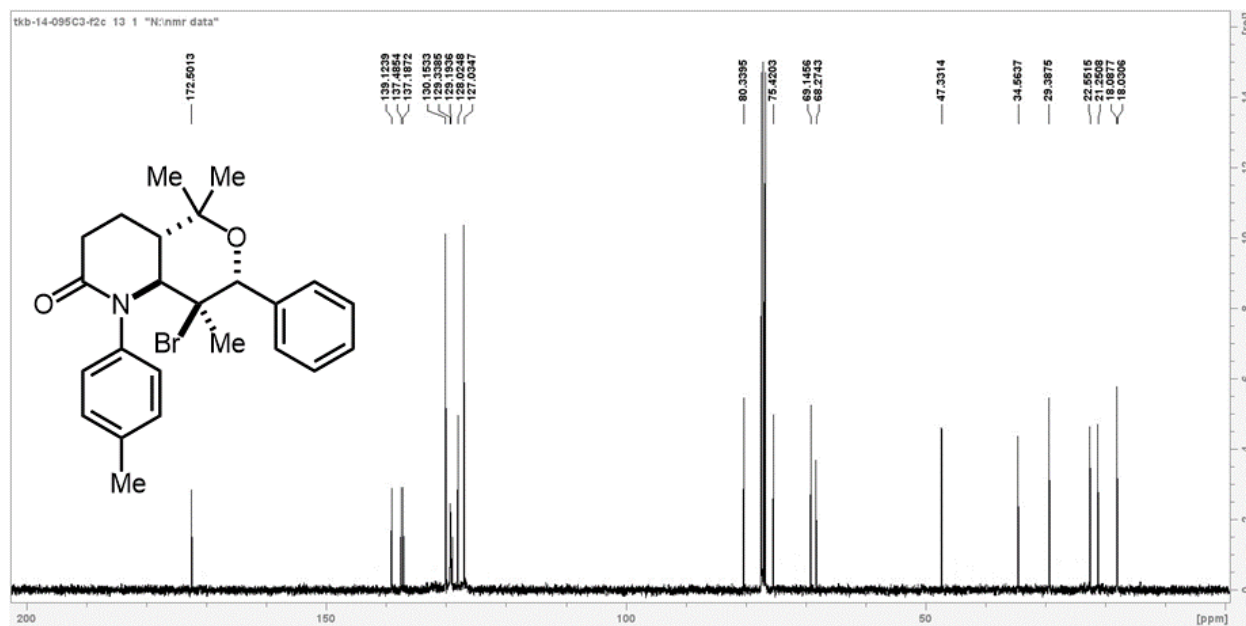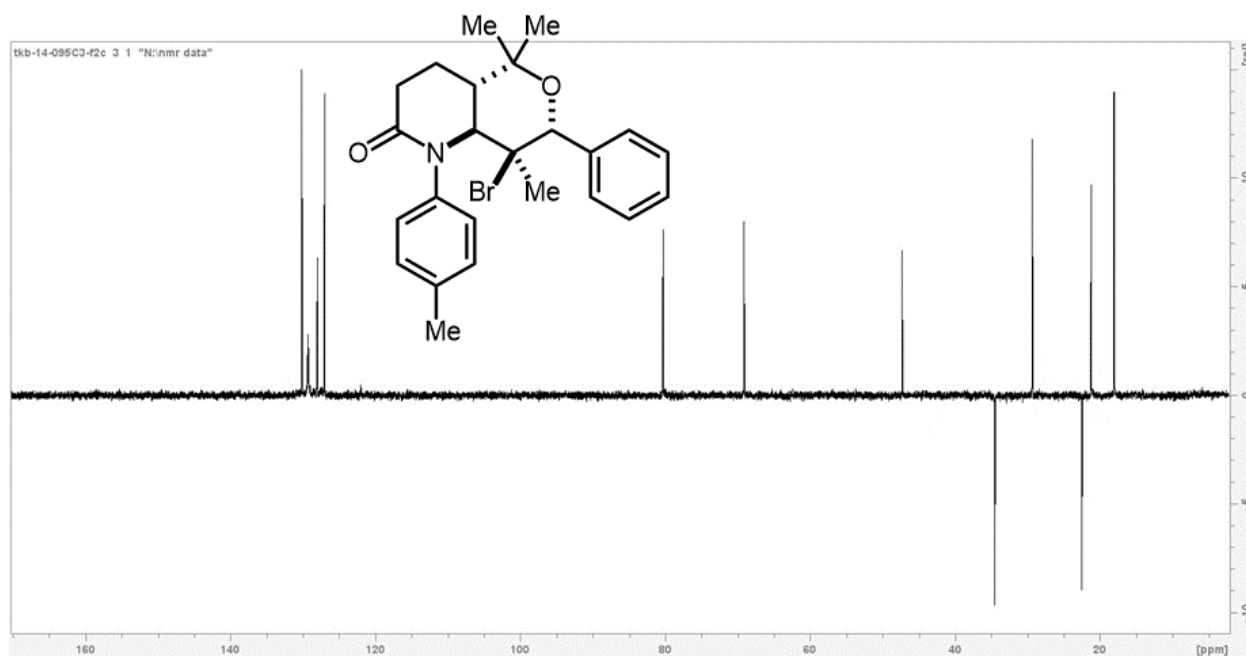

### Compound 5b

Prepared in 1.0 mmol scale using **General Procedure A**. Purification: Flash chromatography on silica eluting with hexane/acetone (90:10 to 70:30). Amorphous solid. Yield = 452.9 mg, 95%, 95:5 dr (*anti:syn*).  $^1\text{H}$  NMR (400 MHz,  $\text{CDCl}_3$ )  $\delta$  7.52 – 7.41 (m, 2H), 7.41 – 7.20 (m, 5H), 7.14 – 7.01 (m, 2H), 5.64 (d,  $J = 16.5$  Hz, 1H), 5.25 (d,  $J = 16.5$  Hz, 1H), 4.99 (s, 1H), 4.13 (d,  $J = 11.0$  Hz, 1H), 2.76 (ddd,  $J = 17.8, 4.9, 2.0$  Hz, 1H), 2.55 (ddd,  $J = 18.2, 13.2, 6.0$  Hz, 1H), 1.93 (td,  $J =$

11.6, 2.1 Hz, 1H), 1.82 (ddt,  $J = 10.3, 6.0, 2.0$  Hz, 1H), 1.66 (s, 3H), 1.51 – 1.43 (m, 1H), 1.37 (s, 3H), 1.25 (s, 3H).  $^{13}\text{C}$  NMR (101 MHz,  $\text{CDCl}_3$ )  $\delta$  173.06, 137.06, 136.26, 132.23, 130.32, 128.97, 128.81, 128.54, 128.48, 128.23, 127.22, 80.31, 75.25, 71.37, 66.27, 48.07, 45.98, 34.24, 29.30, 22.19, 18.47, 18.05. **HRMS-EI<sup>+</sup>** ( $m/z$ ): calc for  $\text{C}_{24}\text{H}_{27}\text{BrClNO}_2$   $[\text{M}]^+$  475.0914, found 475.0918.

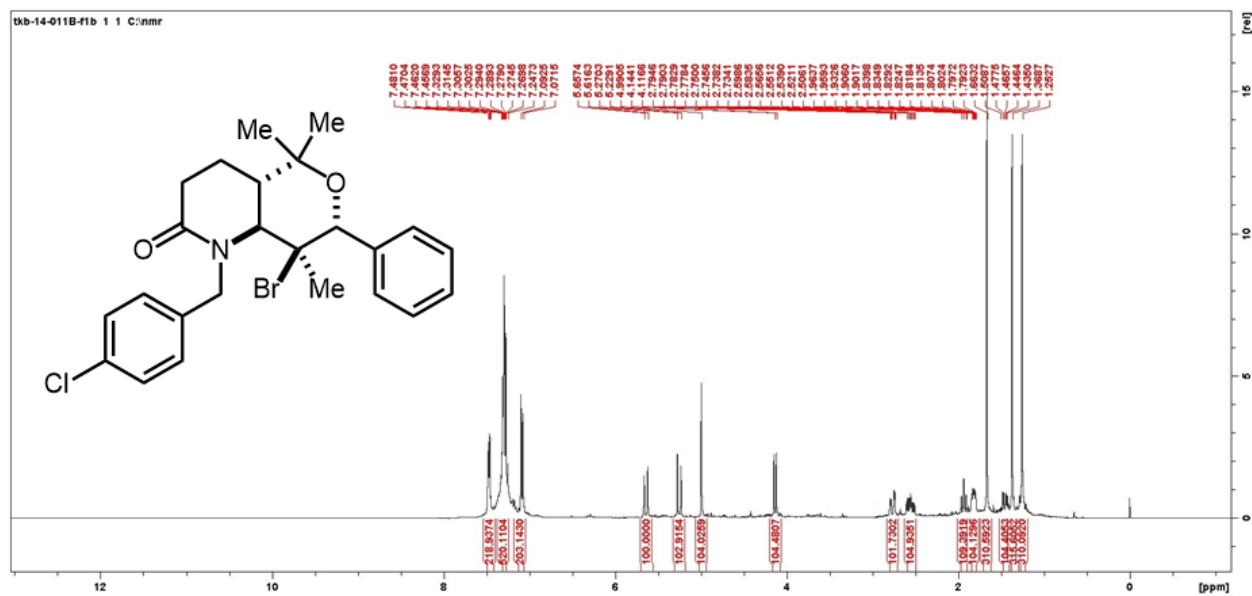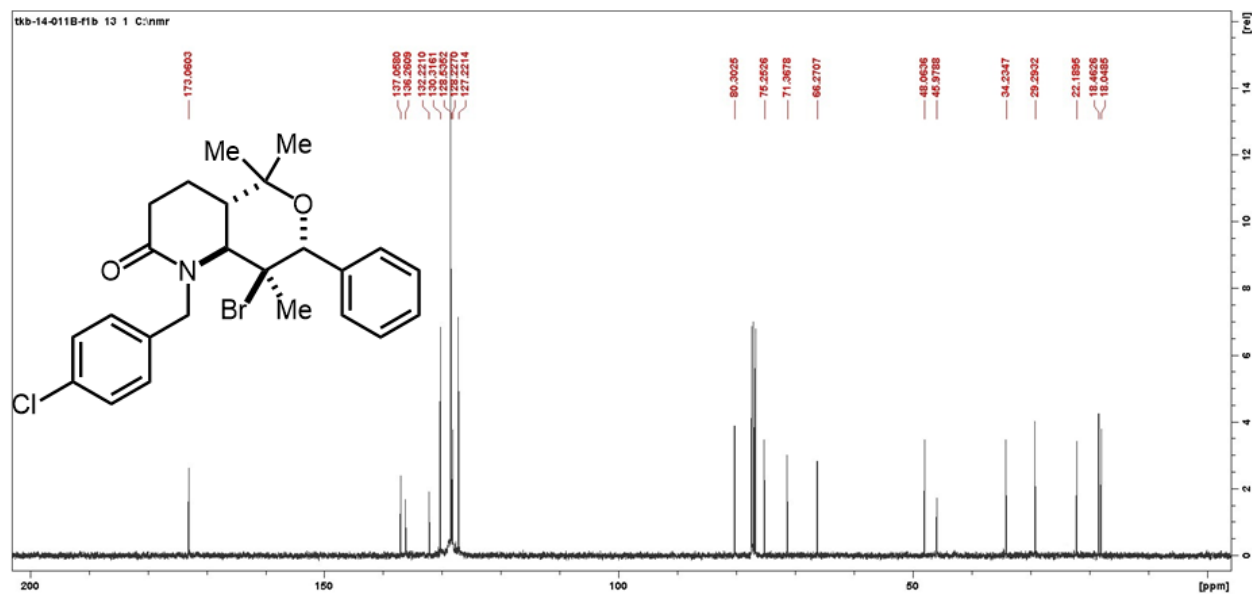

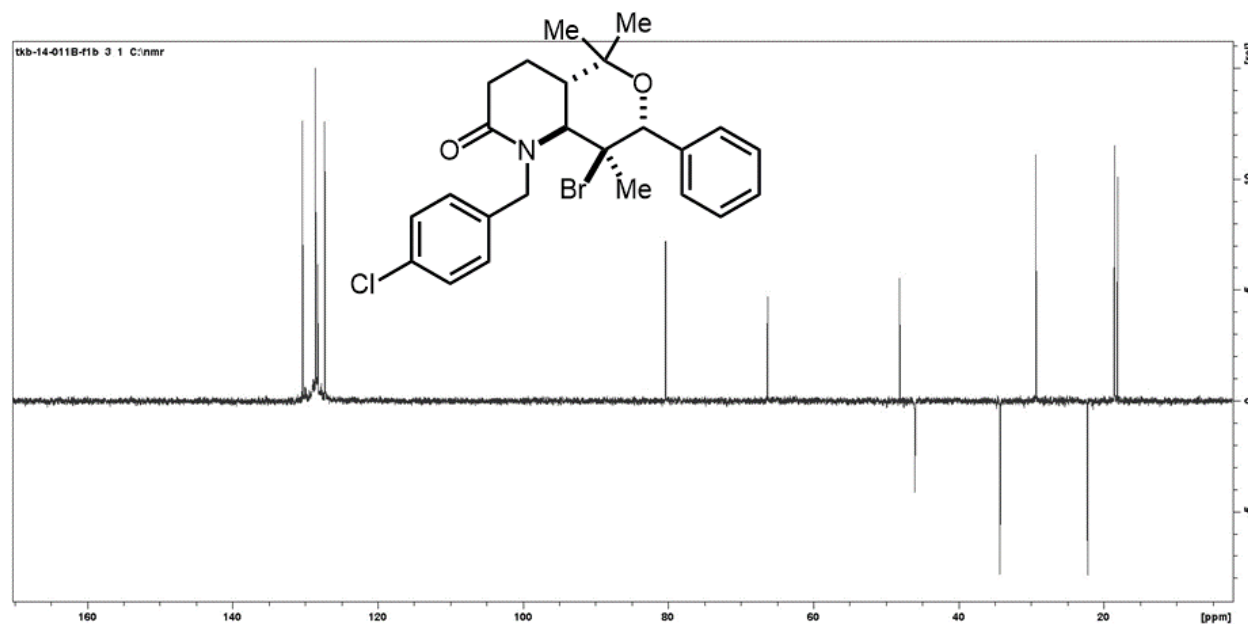

### Compound 5c

Prepared in 1.0 mmol scale using **General Procedure A**. Purification: Flash chromatography on silica eluting with hexane/acetone (90:10 to 70:30). Amorphous solid. Yield = 438.1 mg, 96%, 95:5 dr (*anti:syn*).  $^1\text{H}$  NMR (400 MHz,  $\text{CDCl}_3$ )  $\delta$  7.57 – 7.55 (m, 2H), 7.39 – 7.20 (m, 8H), 5.13 (s, 1H), 4.52 (ddd,  $J = 13.9, 10.2, 5.9$  Hz, 1H), 4.31 (ddd,  $J = 14.3, 9.8, 5.2$  Hz, 1H), 4.14 (d,  $J = 10.9$  Hz, 1H), 3.17 (ddd,  $J = 12.7, 10.2, 5.2$  Hz, 1H), 2.92 (ddd,  $J = 12.8, 9.8, 5.9$  Hz, 1H), 2.57 (ddd,  $J = 17.7, 5.0, 1.9$  Hz, 1H), 2.44 (ddd,  $J = 18.0, 13.1, 6.0$  Hz, 1H), 1.83 (ddd,  $J = 12.6, 11.0, 2.0$  Hz, 1H), 1.70 (ddd,  $J = 8.8, 4.4, 2.0$  Hz, 1H), 1.37 (s, 3H), 1.29 (s, 3H), 1.31 – 1.08 (m, 1H).  $^{13}\text{C}$  NMR (101 MHz,  $\text{CDCl}_3$ )  $\delta$  177.56, 172.95, 130.36, 129.25, 128.34, 128.23, 127.24, 126.26, 80.38, 77.40, 77.08, 76.76, 75.26, 72.17, 66.30, 47.90, 45.32, 34.31, 33.44, 29.60, 29.25, 22.12, 18.44, 18.00. **HRMS-EI<sup>+</sup>** ( $m/z$ ): calc for  $\text{C}_{25}\text{H}_{30}\text{BrNO}_2$   $[\text{M}]^+$  455.1460, found 455.1465.

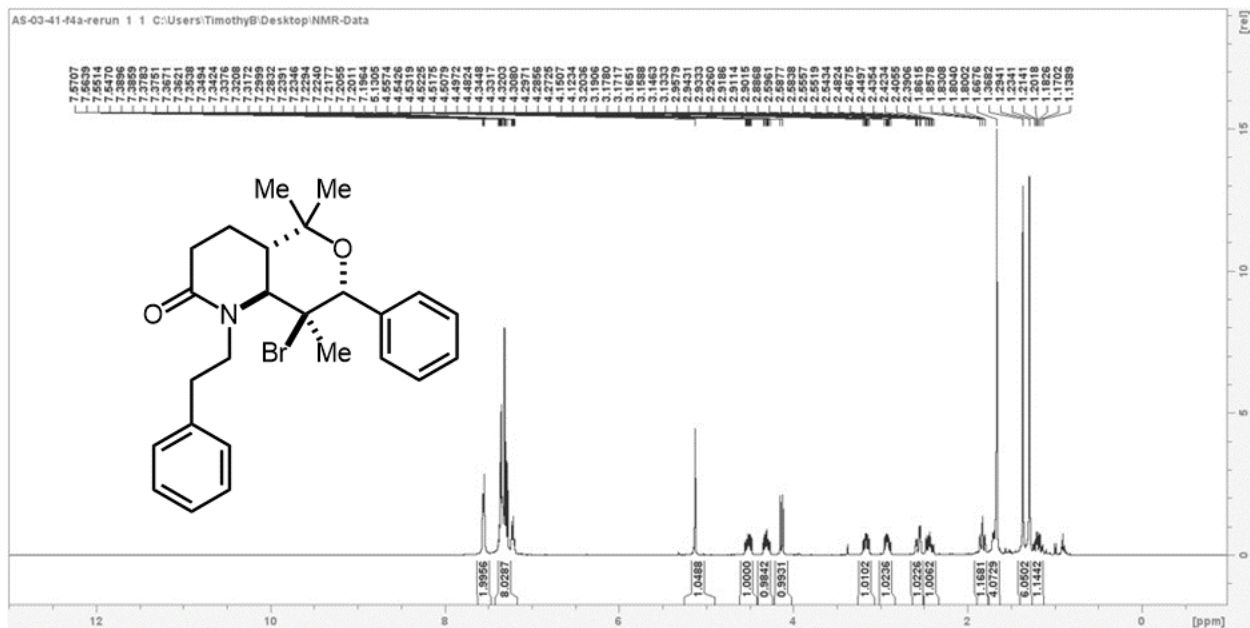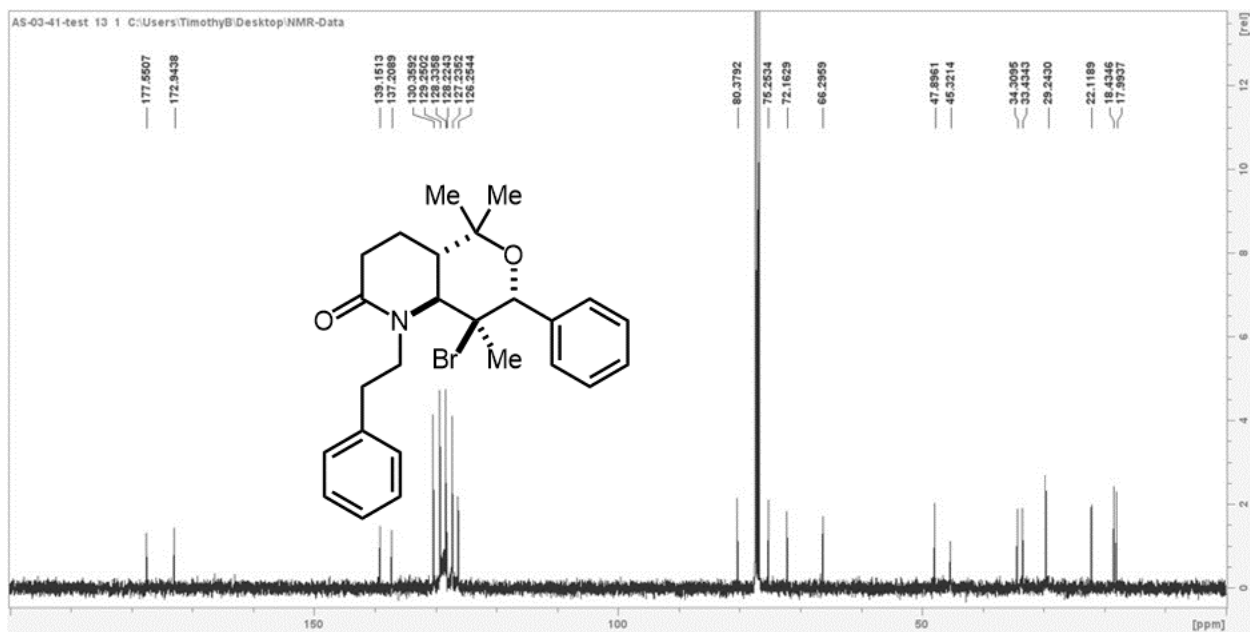

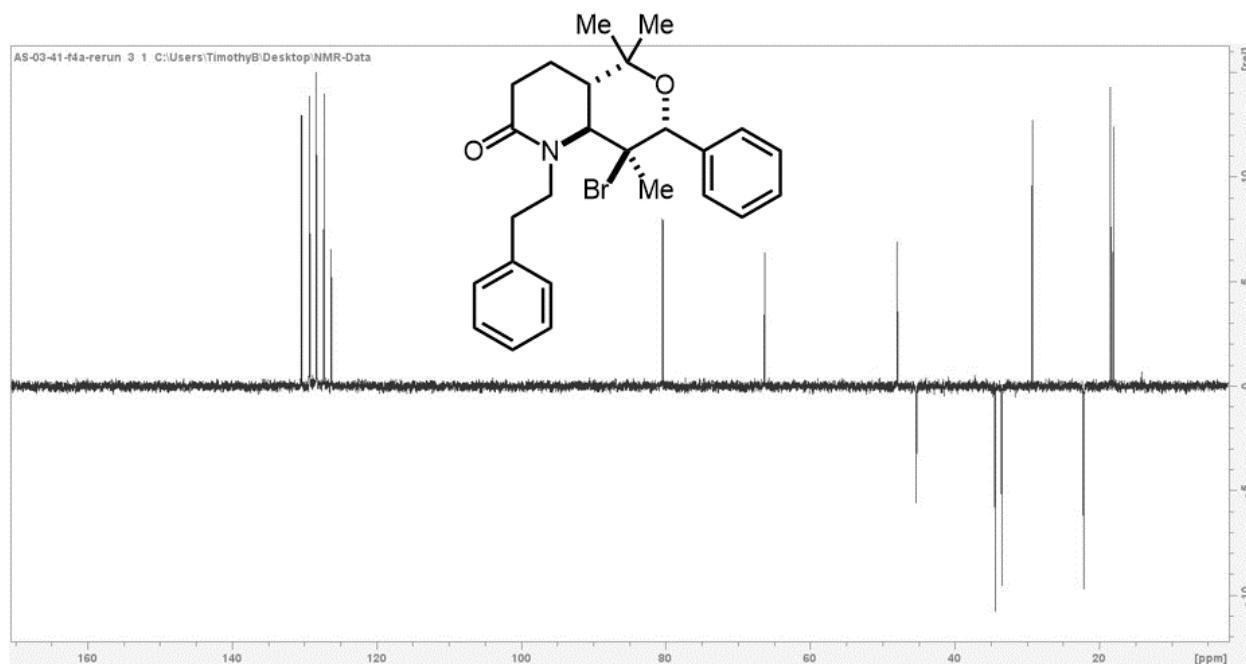

### Compound 5d

Prepared in 1.0 mmol scale using **General Procedure A**. Purification: Flash chromatography on silica eluting with hexane/acetone (90:10 to 70:30). Amorphous solid. Yield = 451.6 mg, 92%, 95:5 dr (*anti:syn*).  $^1\text{H}$  NMR (400 MHz,  $\text{CDCl}_3$ )  $\delta$  7.54 – 7.51 (m, 2H), 7.33 – 7.22 (m, 7H), 5.10 (s, 1H), 4.42 (ddd,  $J = 13.8, 10.5, 5.7$  Hz, 1H), 4.21 (ddd,  $J = 13.9, 10.1, 5.1$  Hz, 1H), 4.11 (d,  $J = 10.9$  Hz, 1H), 3.10 (ddd,  $J = 12.7, 10.4, 5.1$  Hz, 1H), 2.85 (ddd,  $J = 12.7, 10.1, 5.7$  Hz, 1H), 2.56 (ddd,  $J = 17.8, 5.0, 1.9$  Hz, 1H), 2.42 (ddd,  $J = 18.1, 13.2, 6.0$  Hz, 1H), 1.88 – 1.65 (m, 2H), 1.64 (s, 3H), 1.35 (s, 3H), 1.34 – 1.22 (m, 4H).  $^{13}\text{C}$  NMR (101 MHz,  $\text{CDCl}_3$ )  $\delta$  172.66, 137.73, 137.17, 132.00, 130.53, 130.35, 128.45, 128.25, 127.24, 80.39, 75.24, 72.35, 66.55, 47.98, 45.36, 34.28, 32.94, 29.25, 22.31, 18.39, 18.01. **HRMS- $\text{EI}^+$**  ( $m/z$ ): calc for  $\text{C}_{25}\text{H}_{29}\text{BrClNO}_2$   $[\text{M}]^+$  489.1070, found 489.1075.





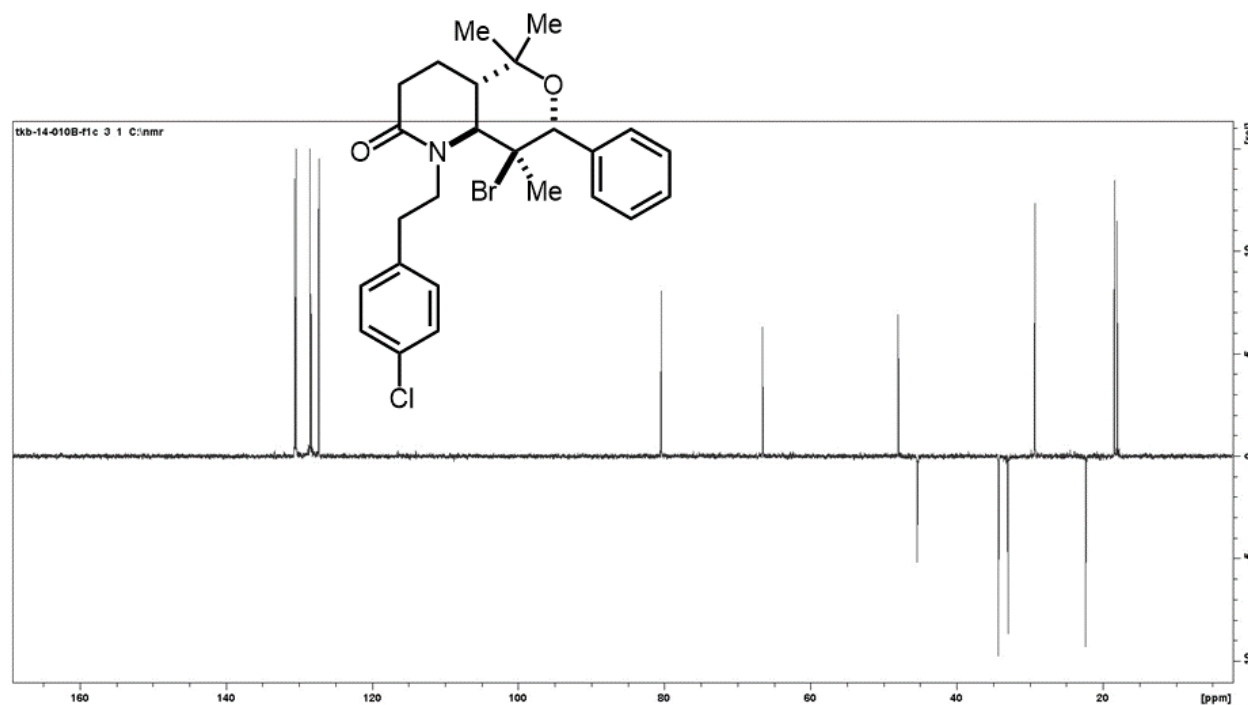

### Compound 5e

Prepared in 1.0 mmol scale using **General Procedure A**. Purification: Flash chromatography on silica eluting with hexane/acetone (90:10 to 50:50). Amorphous solid. Yield = 497.5 mg, 88%, 95:5 dr (*anti:syn*).  $^1\text{H}$  NMR (400 MHz,  $\text{CDCl}_3$ )  $\delta$  7.67 (s, 1H), 7.54 – 7.51 (m, 2H), 7.40 – 7.25 (m, 4H), 6.97 (s, 1H), 5.10 (d,  $J = 5.0$  Hz, 1H), 4.64 – 4.45 (m, 1H), 4.43 – 4.22 (m, 1H), 4.16 (d,  $J = 10.9$  Hz, 1H), 3.86 (s, 3H), 3.84 – 3.71 (m, 1H), 3.24 – 3.10 (m, 2H), 2.56 – 2.38 (m, 2H), 1.86 – 1.79 (m, 1H), 1.71 – 1.60 (m, 4H), 1.35 (s, 3H), 1.29 (s, 3H).  $^{13}\text{C}$  NMR (101 MHz,  $\text{CDCl}_3$ )  $\delta$  172.91, 155.22, 139.79, 137.23, 135.97, 133.21, 130.33, 128.26, 127.25, 127.21, 115.17, 114.27, 110.08, 80.42, 75.30, 72.21, 66.42, 56.47, 48.06, 43.80, 34.47, 33.57, 29.26, 22.14, 18.49, 17.94. **HRMS-EI<sup>+</sup>** ( $m/z$ ): calc for  $\text{C}_{26}\text{H}_{31}\text{Br}_2\text{NO}_3$   $[\text{M}]^+$  563.0671, found 563.0677.

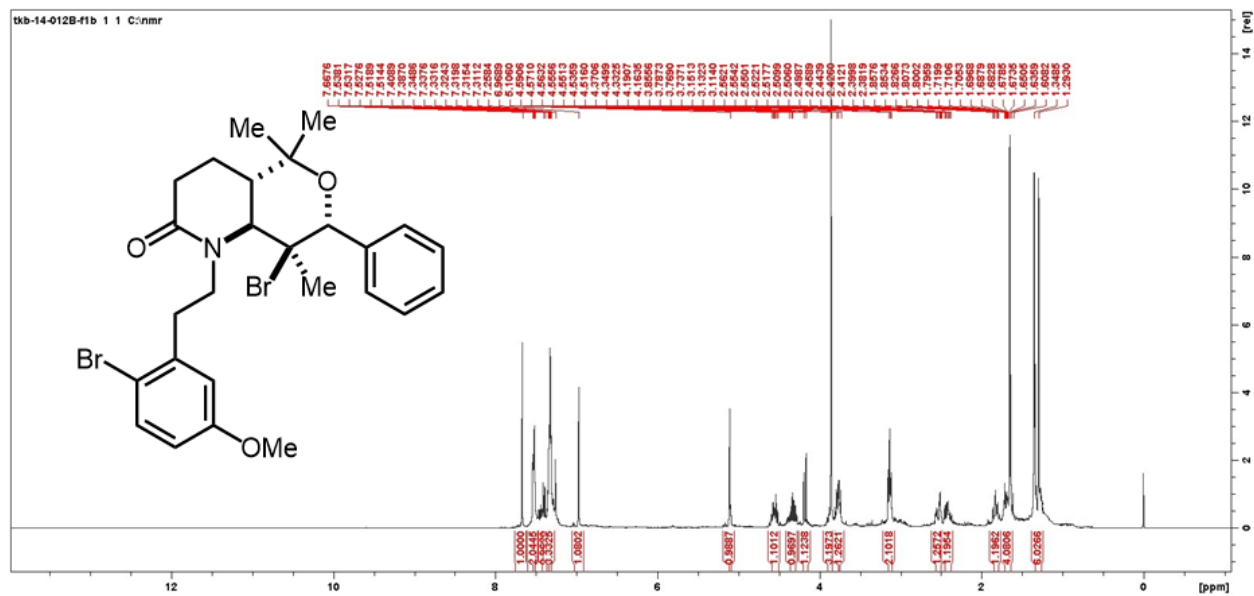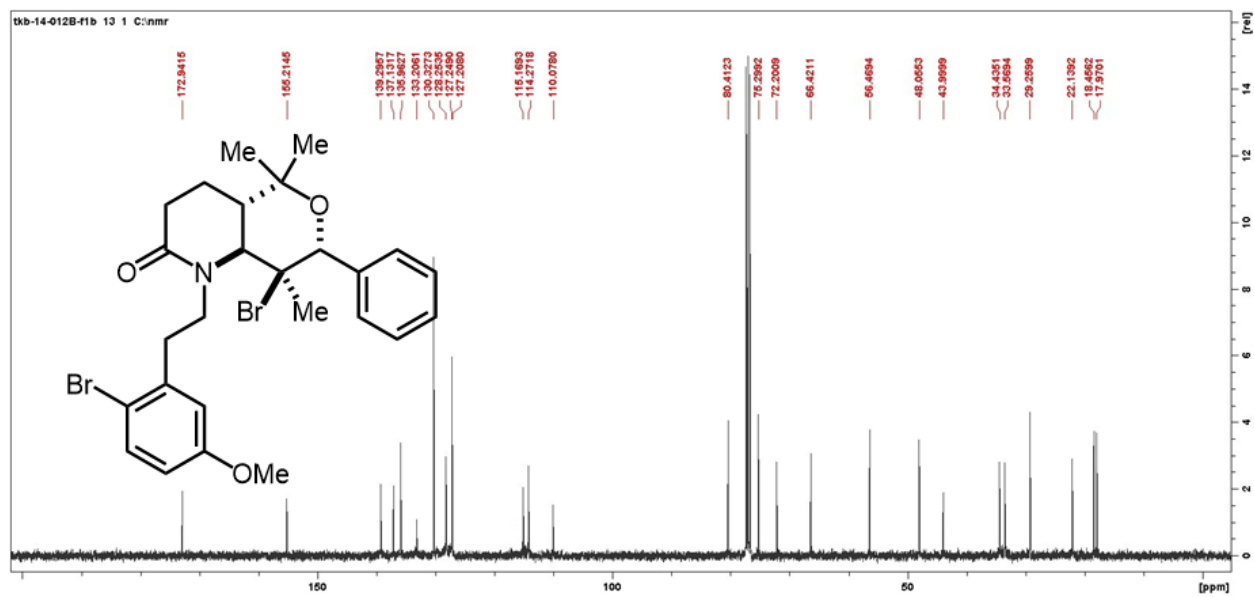

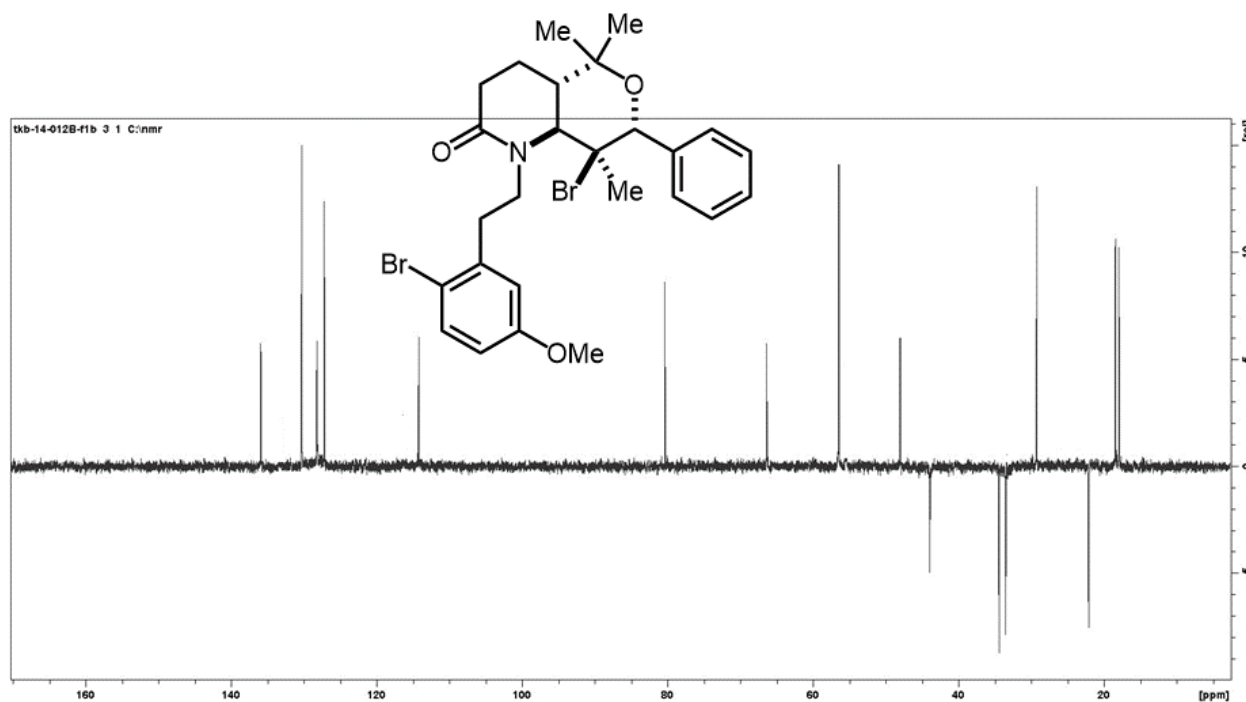

### Compound 5f

Prepared in 1.0 mmol scale using **General Procedure A**. Purification: Flash chromatography on silica eluting with hexane/acetone (90:10 to 70:30). Amorphous solid. Yield = 440.9 mg, 91%, 95:5 dr (*anti:syn*).  $^1\text{H}$  NMR (400 MHz,  $\text{CDCl}_3$ )  $\delta$  7.50 – 7.41 (m, 2H), 7.35 – 7.20 (m, 3H), 7.12 (d,  $J = 7.8$  Hz, 2H), 7.04 (d,  $J = 8.0$  Hz, 2H), 5.68 (d,  $J = 16.3$  Hz, 1H), 5.23 (d,  $J = 16.3$  Hz, 1H), 4.80 (s, 1H), 4.27 (d,  $J = 11.1$  Hz, 1H), 2.77 (ddd,  $J = 17.9, 4.8, 1.9$  Hz, 1H), 2.53 (ddd,  $J = 18.4, 13.3, 6.2$  Hz, 1H), 2.25 – 2.14 (m, 1H), 2.05 (dq,  $J = 14.8, 7.4$  Hz, 1H), 1.86 (dq,  $J = 14.8, 7.4$  Hz, 1H), 1.70 (s, 3H), 1.74 – 1.61 (m, 1H), 1.54 – 1.38 (m, 2H), 1.23 (dq,  $J = 14.8, 7.5$  Hz, 1H), 1.01 (t,  $J = 7.4$  Hz, 3H), 0.75 (t,  $J = 7.4$  Hz, 3H).  $^{13}\text{C}$  NMR (101 MHz,  $\text{CDCl}_3$ )  $\delta$  173.09, 137.50, 135.99, 134.48, 130.22, 129.10, 128.08, 127.13, 127.05, 79.74, 71.18, 65.30, 45.96, 42.51, 34.56, 28.30, 22.80, 21.11, 21.10, 18.58, 7.03, 6.21. **HRMS-EI<sup>+</sup>** ( $m/z$ ): calc for  $\text{C}_{27}\text{H}_{34}\text{BrNO}_2$   $[\text{M}]^+$  483.1773, found 483.1777.

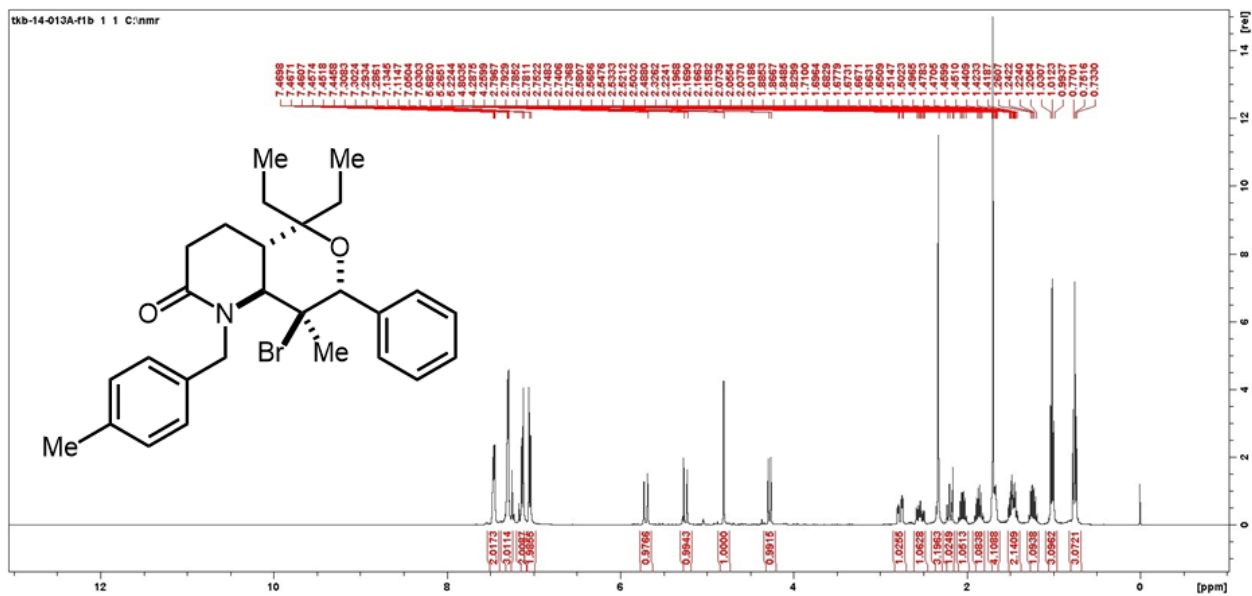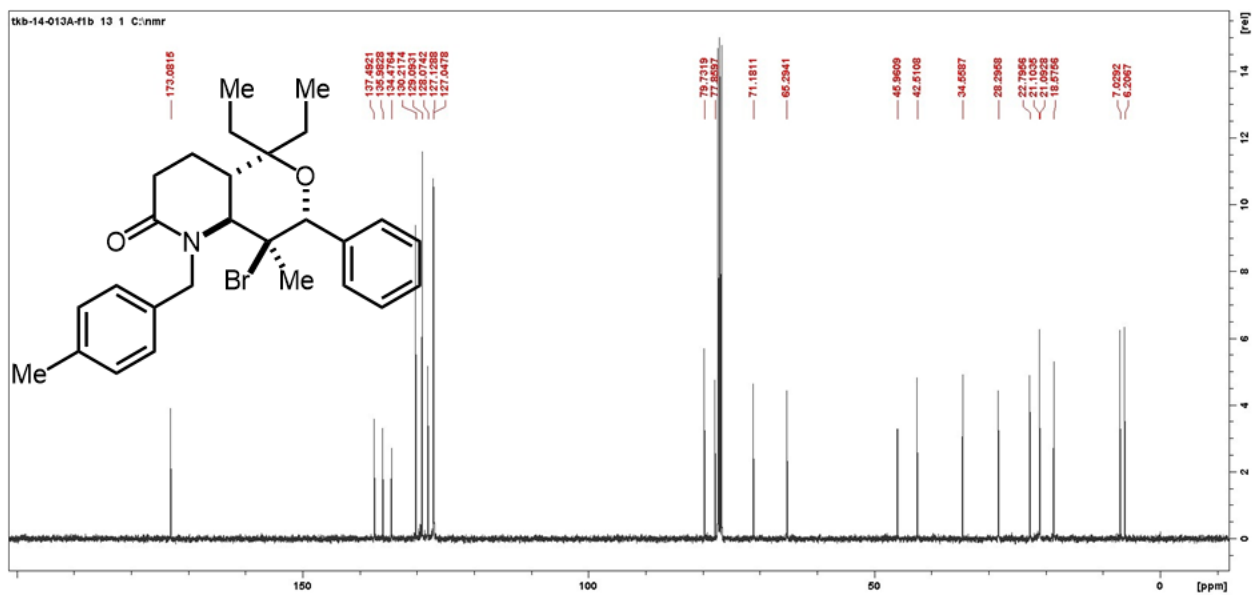

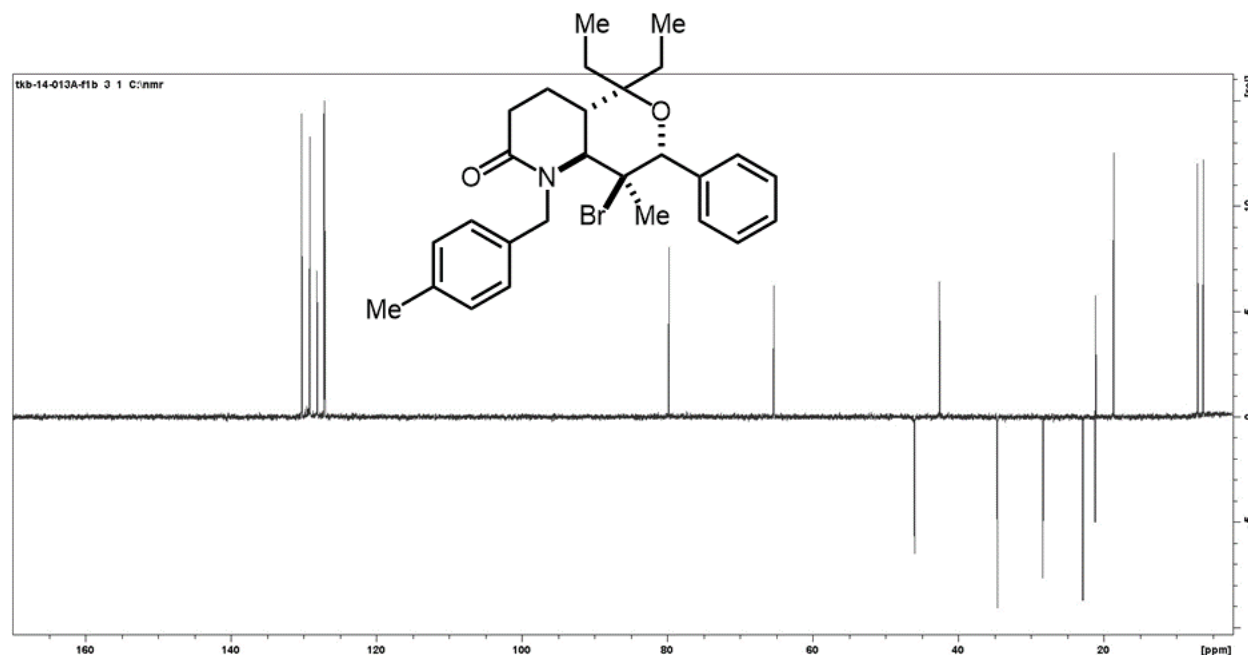

### Compound 5g

Prepared in 1.0 mmol scale using **General Procedure A**. Purification: Flash chromatography on silica eluting with hexane/acetone (90:10 to 50:50). Amorphous solid. Yield = 504.4 mg, 85%, 95:5 dr (*anti:syn*).  $^1\text{H}$  NMR (400 MHz,  $\text{CDCl}_3$ )  $\delta$  7.53 – 7.48 (m, 3H), 7.33 (d,  $J = 5.6$  Hz, 3H), 7.20 (dd,  $J = 8.4, 2.1$  Hz, 1H), 6.81 (d,  $J = 8.4$  Hz, 1H), 4.92 (s, 1H), 4.44 (ddd,  $J = 15.5, 10.5, 5.9$  Hz, 1H), 4.22 (dd,  $J = 12.4, 7.6$  Hz, 2H), 3.83 (s, 3H), 3.06 (ddd,  $J = 14.7, 10.3, 5.0$  Hz, 1H), 2.83 (ddd,  $J = 12.5, 9.8, 5.9$  Hz, 1H), 2.53 (dd,  $J = 17.8, 4.7$  Hz, 1H), 2.40 (ddd,  $J = 18.1, 13.0, 6.0$  Hz, 1H), 2.11 (dt,  $J = 22.0, 9.7$  Hz, 2H), 1.84 (dq,  $J = 14.7, 7.3$  Hz, 1H), 1.56 (dd,  $J = 13.2, 5.8$  Hz, 1H), 1.44 (dp,  $J = 14.7, 8.0$  Hz, 1H), 1.22 (tq,  $J = 13.1, 6.2$  Hz, 2H), 1.00 (t,  $J = 7.5$  Hz, 3H), 0.81 (t,  $J = 7.3$  Hz, 3H).  $^{13}\text{C}$  NMR (101 MHz,  $\text{CDCl}_3$ )  $\delta$  172.67, 154.37, 137.47, 133.85, 132.94, 130.26, 129.21, 128.17, 127.20, 112.01, 111.30, 79.77, 72.24, 65.94, 56.27, 45.38, 42.33, 34.44, 32.35, 28.18, 22.77, 21.20, 18.49, 7.05, 6.37. **HRMS-EI<sup>+</sup>** ( $m/z$ ): calc for  $\text{C}_{28}\text{H}_{35}\text{Br}_2\text{NO}_3$   $[\text{M}]^+$  591.0984, found 591.0988.

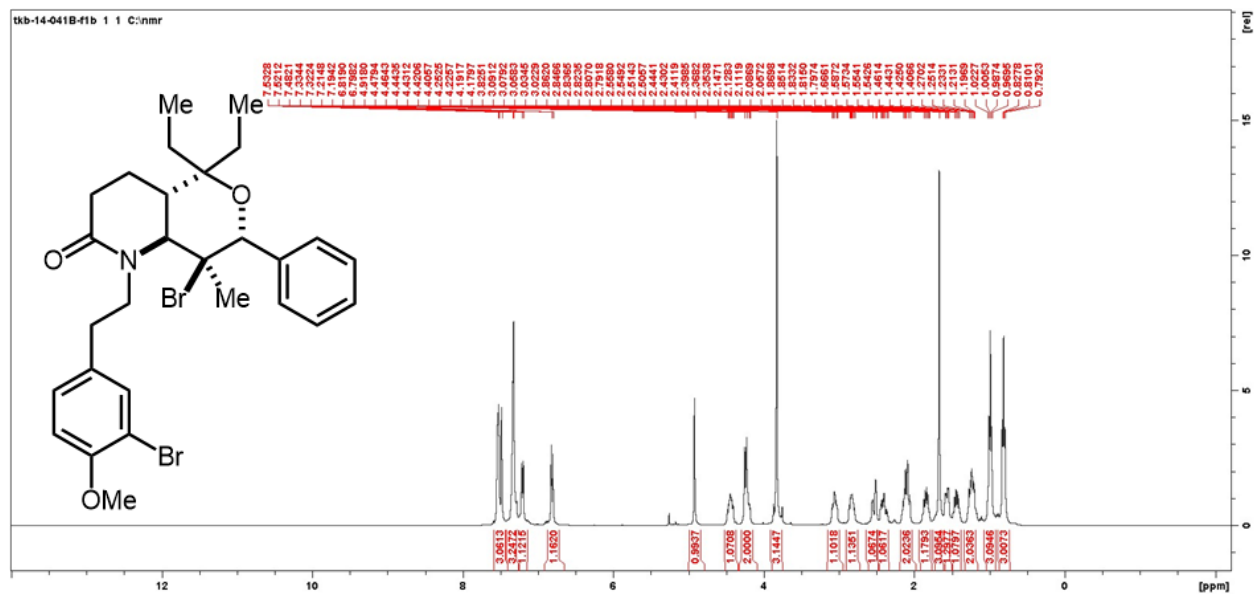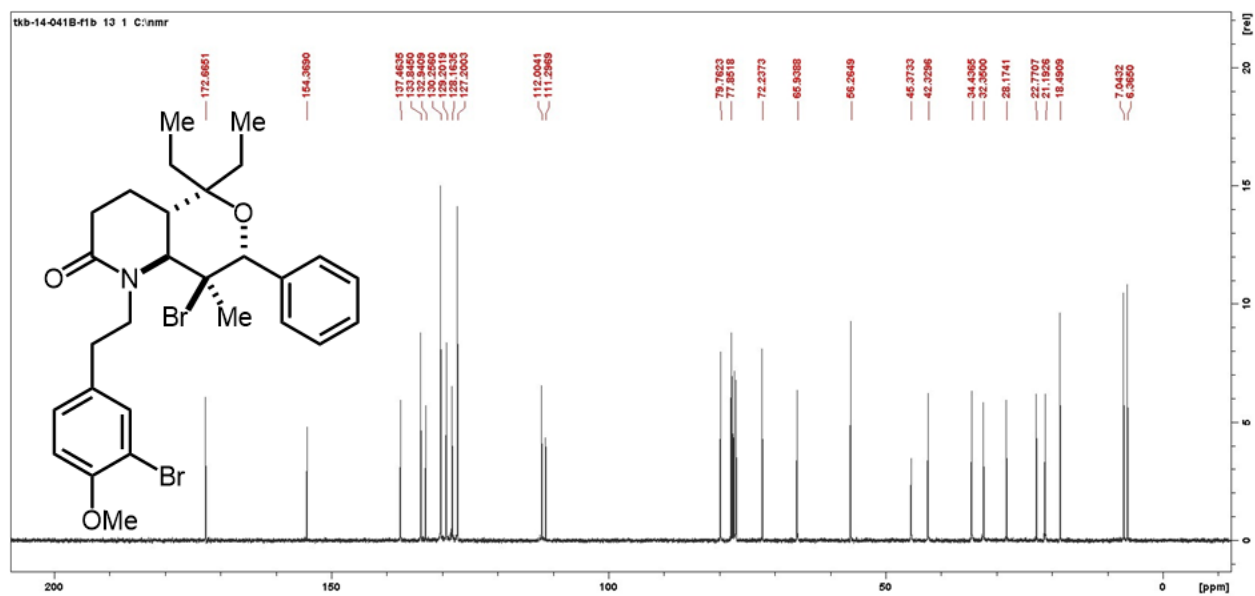

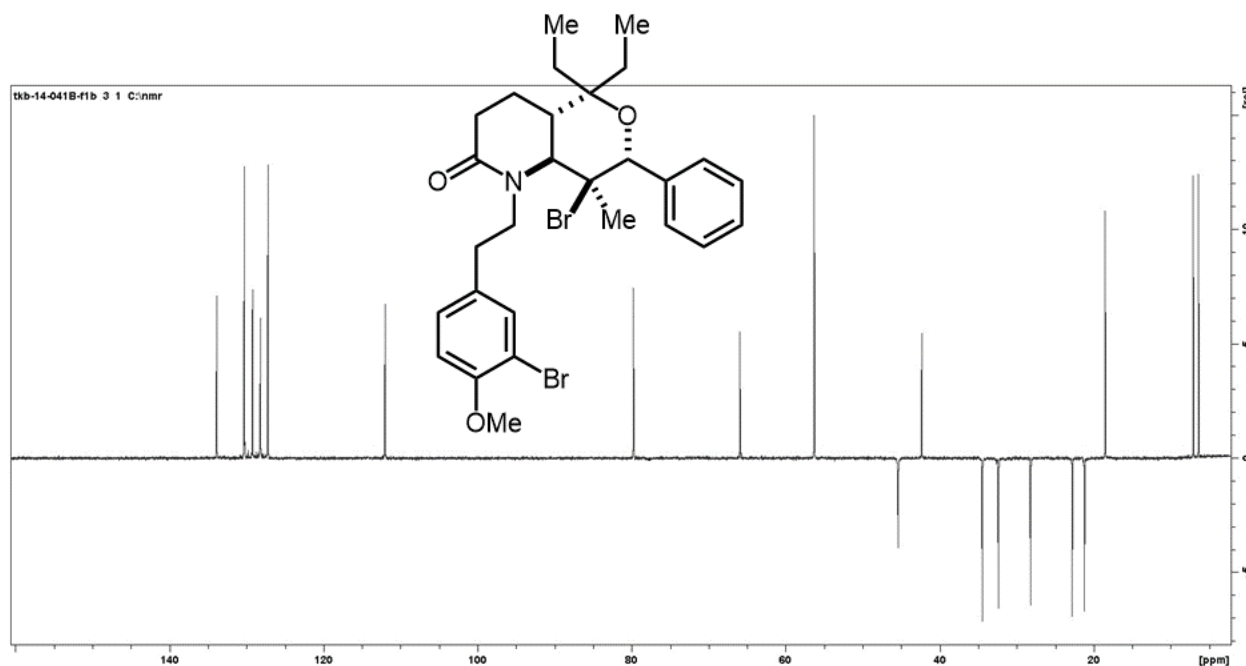

### Compound 5h

Prepared in 1.0 mmol scale using **General Procedure A**. Purification: Flash chromatography on silica eluting with hexane/acetone (90:10 to 75:25). Amorphous solid. Yield = 426.3 mg, 88%, 95:5 dr (*anti:syn*).  $^1\text{H}$  NMR (400 MHz,  $\text{CDCl}_3$ )  $\delta$  7.59 – 7.56 (m, 2H), 7.39 – 7.22 (m, 8H), 4.96 (s, 1H), 4.57 (ddd,  $J = 13.8, 10.2, 5.9$  Hz, 1H), 4.40 – 4.25 (m, 2H), 3.20 (ddd,  $J = 12.6, 10.2, 5.1$  Hz, 1H), 2.96 (ddd,  $J = 12.7, 9.8, 5.9$  Hz, 1H), 2.57 (ddd,  $J = 17.8, 5.0, 1.8$  Hz, 1H), 2.43 (ddd,  $J = 18.0, 13.0, 6.0$  Hz, 1H), 2.21 – 2.06 (m, 2H), 1.88 (dq,  $J = 14.7, 7.3$  Hz, 1H), 1.70 (s, 3H), 1.62 – 1.40 (m, 2H), 1.37 – 1.10 (m, 2H), 1.04 (q,  $J = 6.5$  Hz, 3H), 0.85 (t,  $J = 7.4$  Hz, 3H).  $^{13}\text{C}$  NMR (101 MHz,  $\text{CDCl}_3$ )  $\delta$  172.77, 139.26, 137.55, 130.31, 129.30, 128.38, 128.19, 127.24, 126.29, 79.80, 72.12, 65.83, 45.36, 42.31, 34.56, 33.57, 28.21, 22.79, 22.74, 21.18, 18.54, 7.08, 6.41. **HRMS-EI<sup>+</sup>** ( $m/z$ ): calc for  $\text{C}_{27}\text{H}_{34}\text{BrNO}_2$  [ $\text{M}$ ]<sup>+</sup> 483.1773, found 483.1777.

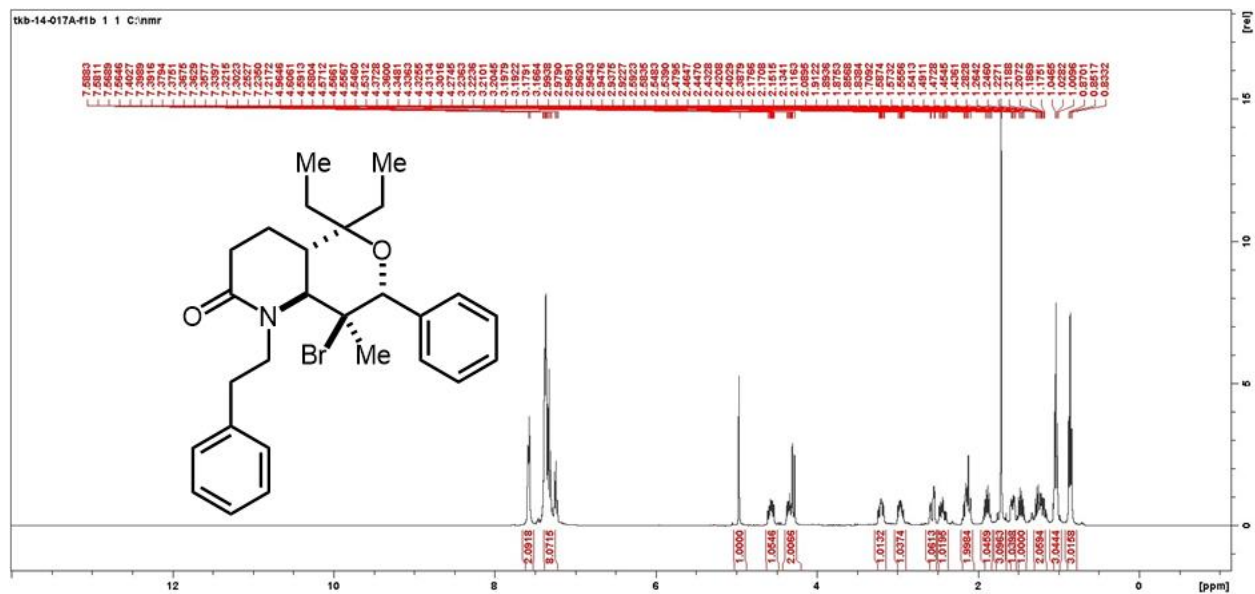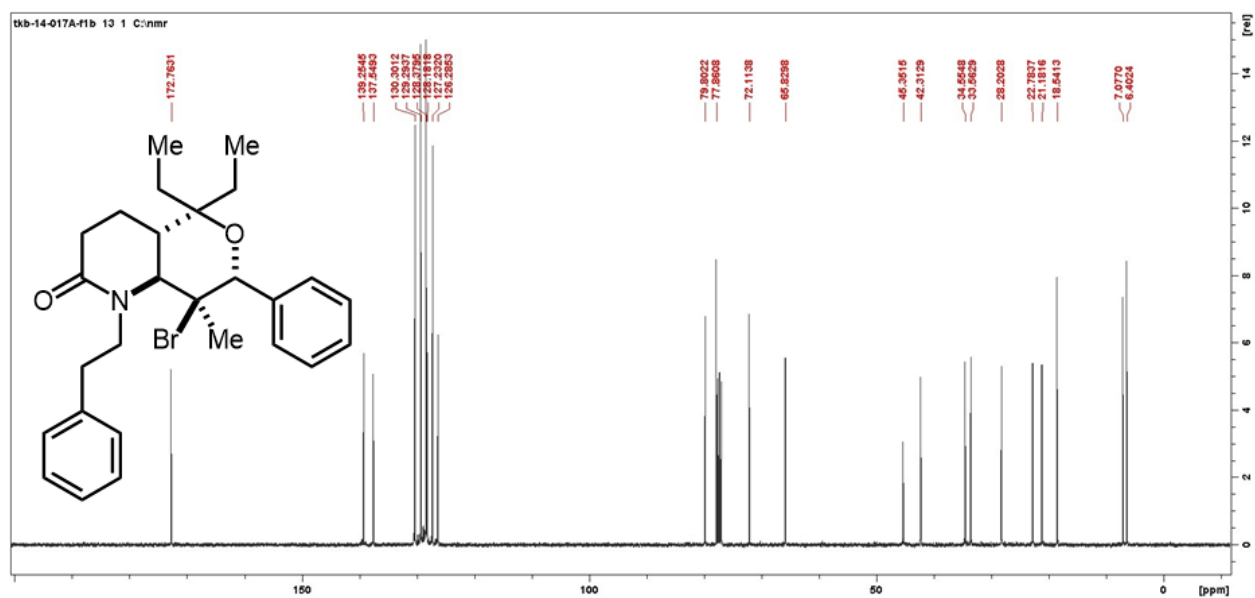



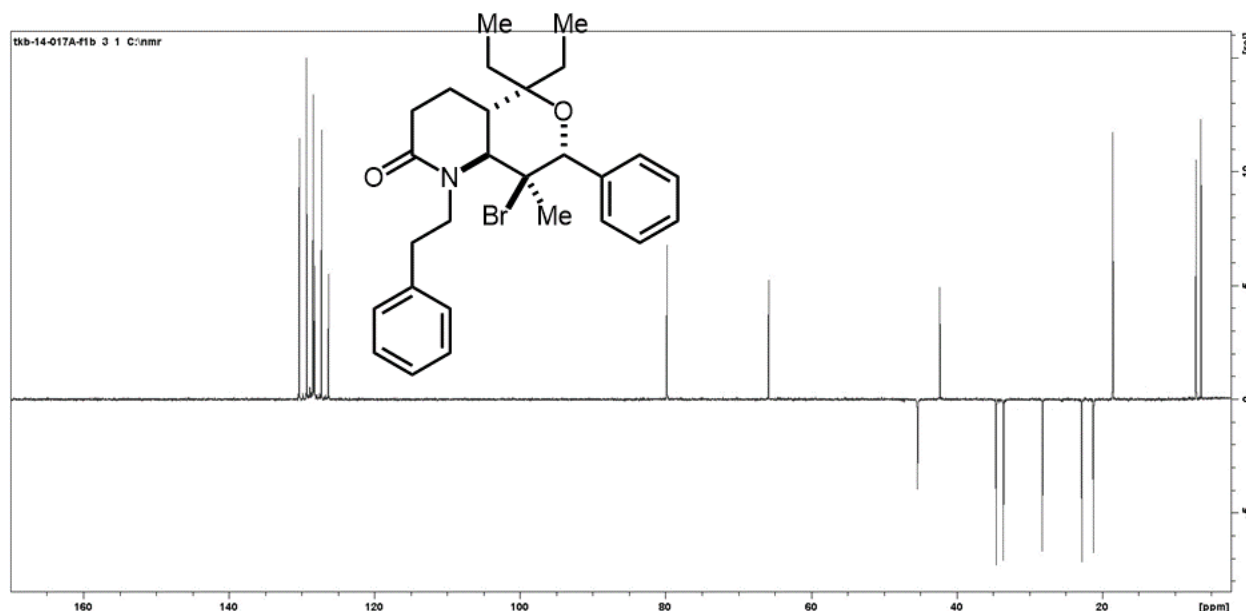

### Compound 5i

Prepared in 1.0 mmol scale using **General Procedure A**. Purification: Flash chromatography on silica eluting with hexane/acetone (90:10 to 70:30). Amorphous solid. Yield = 467.0 mg, 90%, 95:5 dr (*anti:syn*).  $^1\text{H}$  NMR (400 MHz,  $\text{CDCl}_3$ )  $\delta$  7.51 (dq,  $J = 5.9, 3.4$  Hz, 2H), 7.32 (dd,  $J = 5.1, 2.0$  Hz, 3H), 7.31 – 7.16 (m, 4H), 4.90 (s, 1H), 4.43 (ddd,  $J = 13.8, 10.5, 5.8$  Hz, 1H), 4.27 – 4.16 (m, 2H), 3.09 (ddd,  $J = 12.8, 10.5, 5.1$  Hz, 1H), 2.85 (ddd,  $J = 12.8, 10.1, 5.8$  Hz, 1H), 2.53 (ddd,  $J = 17.8, 5.1, 1.8$  Hz, 1H), 2.39 (ddd,  $J = 18.0, 13.1, 5.9$  Hz, 1H), 2.17 – 2.02 (m, 2H), 1.85 (dq,  $J = 14.9, 7.5$  Hz, 1H), 1.62 – 1.51 (m, 1H), 1.43 (dq,  $J = 14.4, 7.2$  Hz, 1H), 1.32 – 1.14 (m, 2H), 1.13 – 0.92 (m, 3H), 0.92 – 0.75 (m, 3H).  $^{13}\text{C}$  NMR (101 MHz,  $\text{CDCl}_3$ )  $\delta$  172.69, 137.77, 137.43, 131.99, 130.54, 130.25, 128.44, 128.18, 127.20, 79.80, 77.86, 72.19, 66.08, 45.33, 42.40, 34.44, 32.97, 28.21, 22.79, 21.30, 18.47, 7.00, 6.33. **HRMS-EI<sup>+</sup>** ( $m/z$ ): calc for  $\text{C}_{27}\text{H}_{33}\text{BrClINO}_2$  [ $\text{M}$ ]<sup>+</sup> 517.1383, found 517.1387.

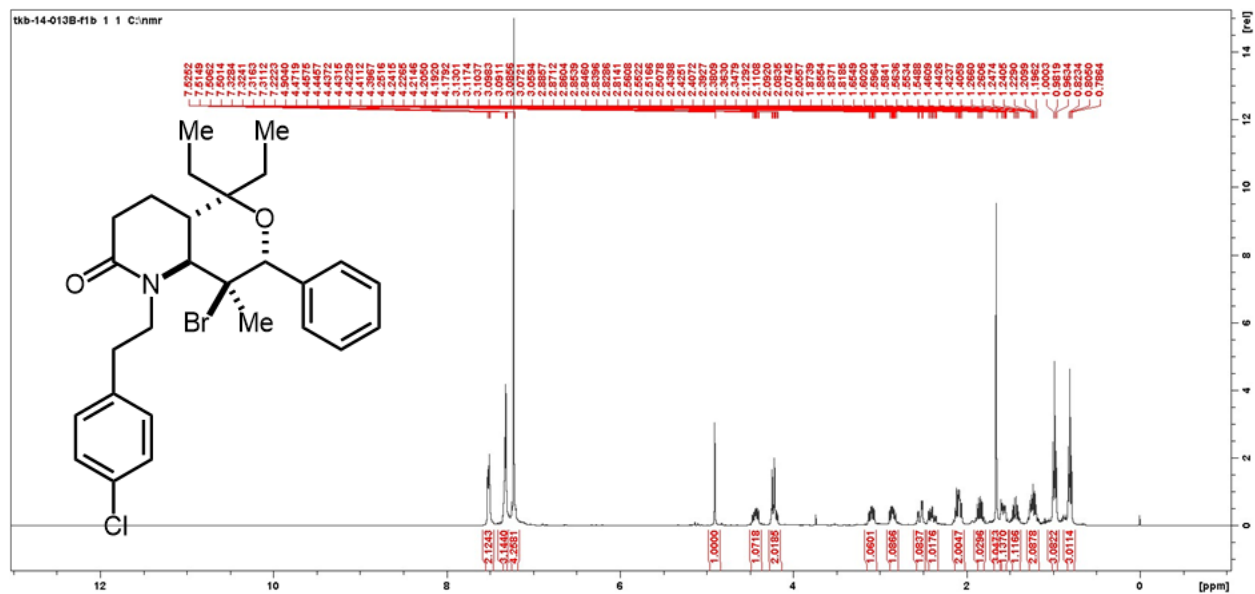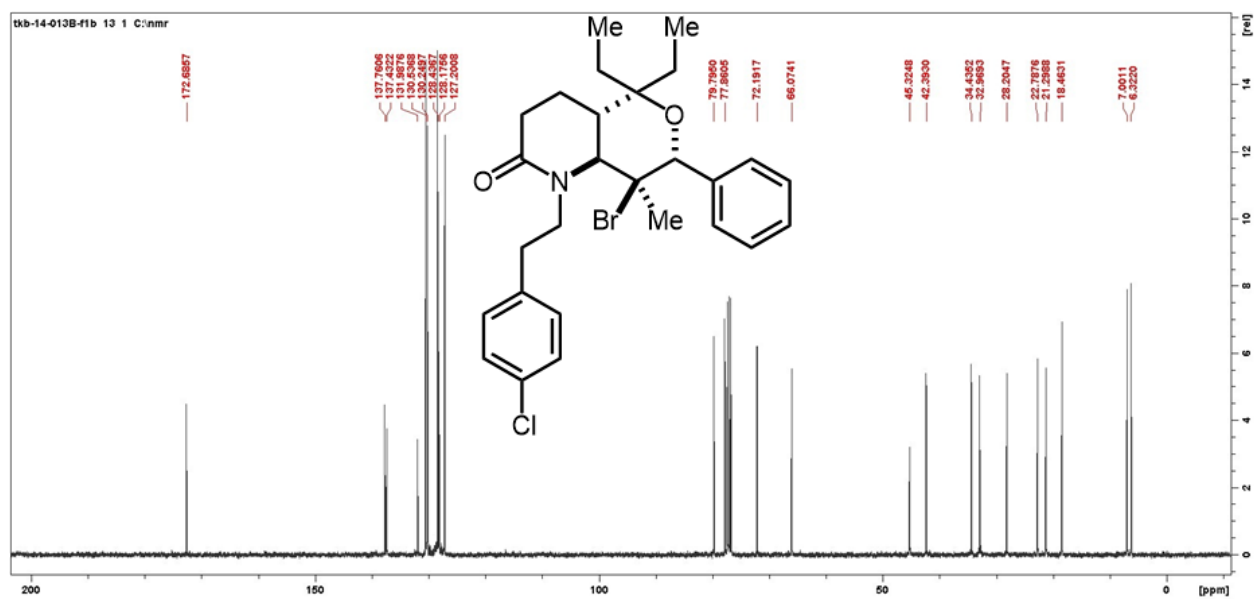

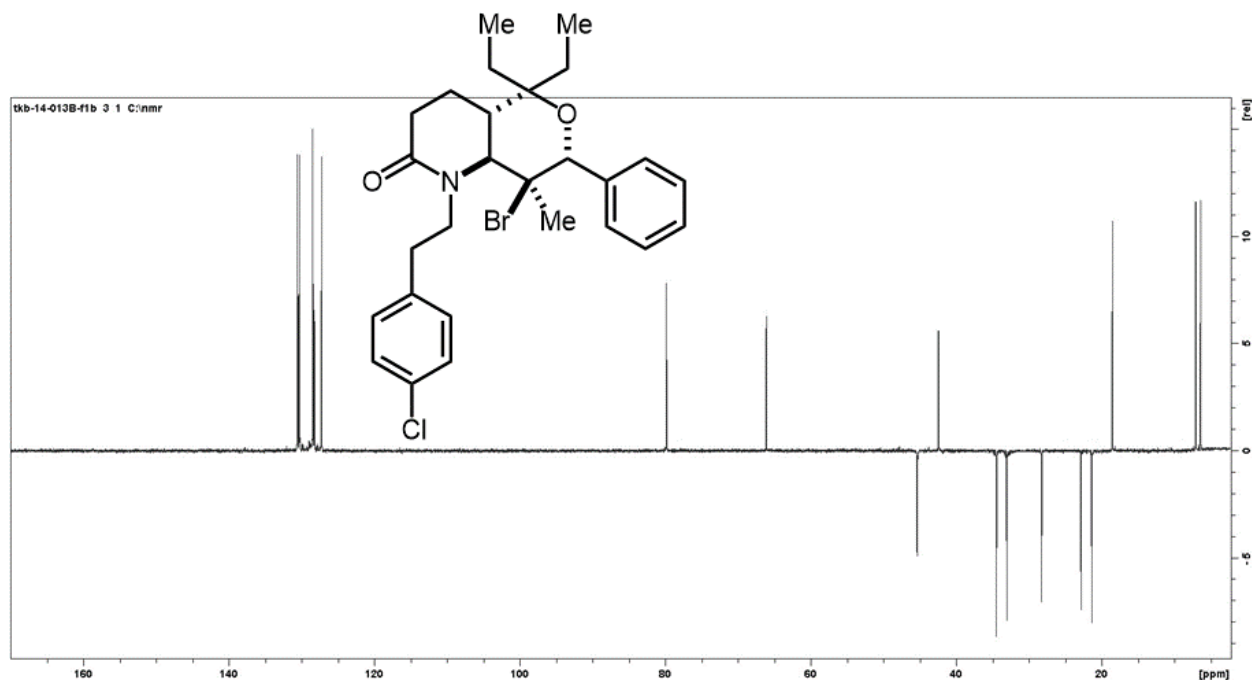

### Compound 5j

Prepared in 1.0 mmol scale using **General Procedure A**. Purification: Flash chromatography on silica eluting with hexane/acetone (90:10 to 70:30). Amorphous solid. Yield = 464.5 mg, 80%, 95:5 dr (*anti:syn*).

**HRMS-EI<sup>+</sup>** ( $m/z$ ): calc for C<sub>35</sub>H<sub>34</sub>BrNO<sub>2</sub> [M]<sup>+</sup> 579.1773, found 579.1778.

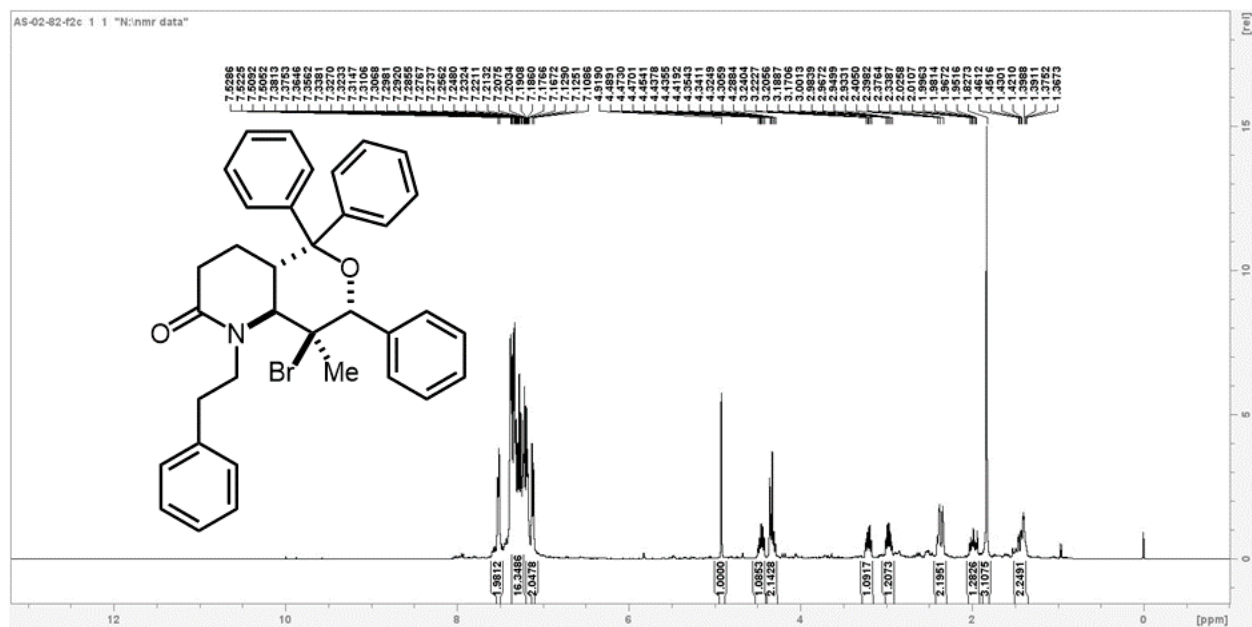

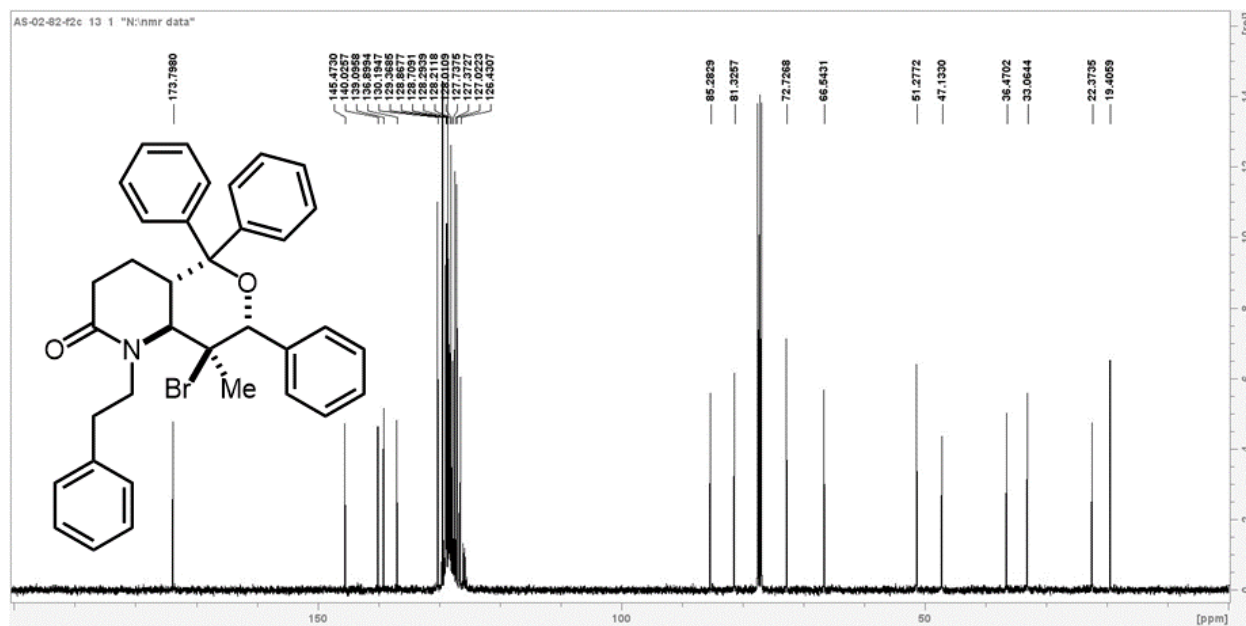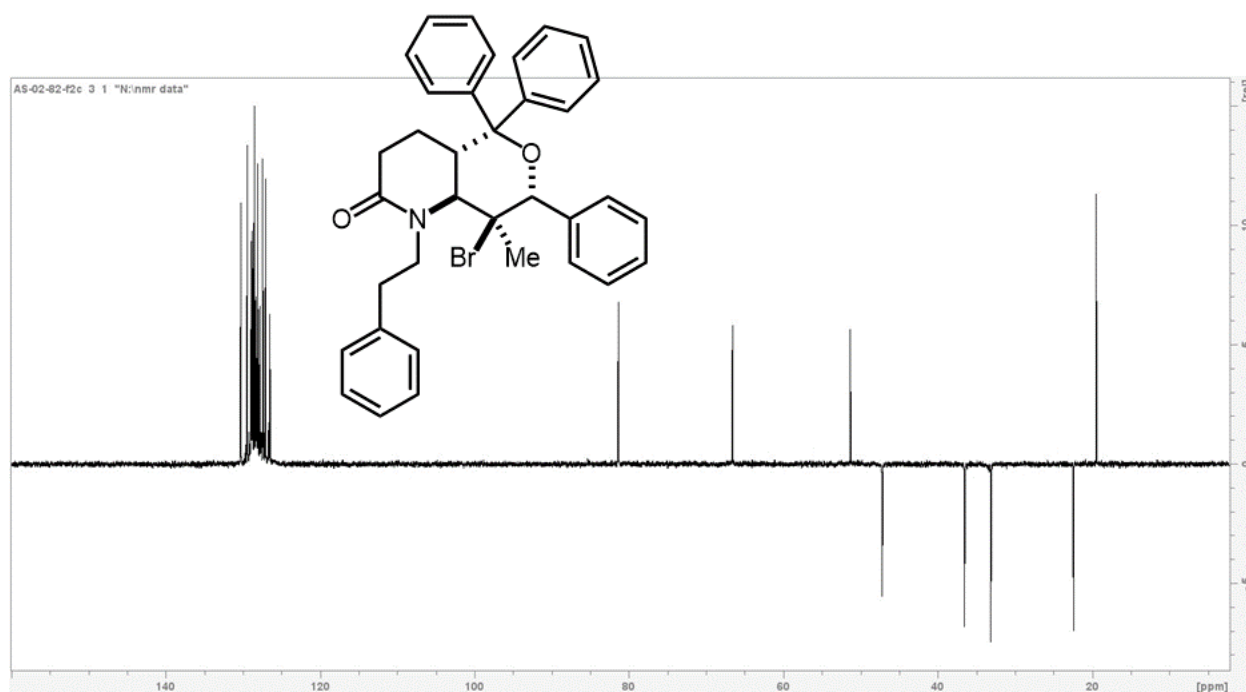

### Compound 5k

Prepared in 1.0 mmol scale using **General Procedure A**. Purification: Flash chromatography on silica eluting with hexane/acetone (90:10 to 60:40). Amorphous solid. Yield = 414.8 mg, 80%, 95:5 dr (*anti:syn*).  $^1\text{H}$  NMR (400 MHz,  $\text{CDCl}_3$ )  $\delta$  7.59 – 7.50 (m, 2H), 7.50 – 7.31 (m, 8H), 7.31 – 7.16 (m, 5H), 4.96 (s, 1H), 4.33 (d,  $J = 11.4$  Hz, 1H), 4.25 (h,  $J = 6.7$  Hz, 1H), 2.55 (ddd,  $J = 13.4, 11.3, 2.7$  Hz, 1H), 2.41 (dt,  $J = 16.8, 2.9$  Hz, 1H), 2.07 – 1.91 (m, 2H), 1.90 (s, 3H), 1.64 (d,

$J = 6.7$  Hz, 3H), 1.61 – 1.48 (m, 1H), 1.37 (d,  $J = 6.7$  Hz, 3H).  $^{13}\text{C}$  NMR (101 MHz,  $\text{CDCl}_3$ )  $\delta$  174.51, 145.22, 140.13, 137.05, 130.06, 129.02, 128.47, 128.30, 128.22, 128.11, 127.71, 127.39, 126.80, 85.65, 81.94, 72.71, 68.90, 56.00, 51.70, 37.90, 23.67, 22.80, 19.63, 18.94. **HRMS-EI<sup>+</sup>** ( $m/z$ ): calc for  $\text{C}_{35}\text{H}_{33}\text{Br}_2\text{NO}_2$   $[\text{M}]^+$  657.0878, found 657.0872.

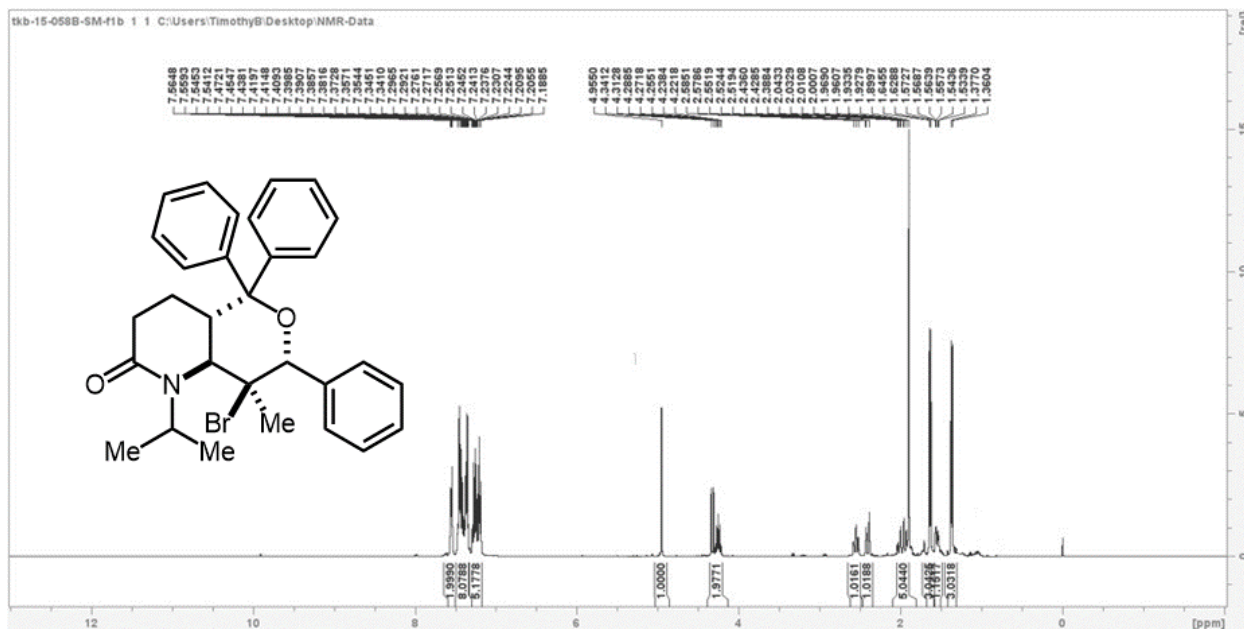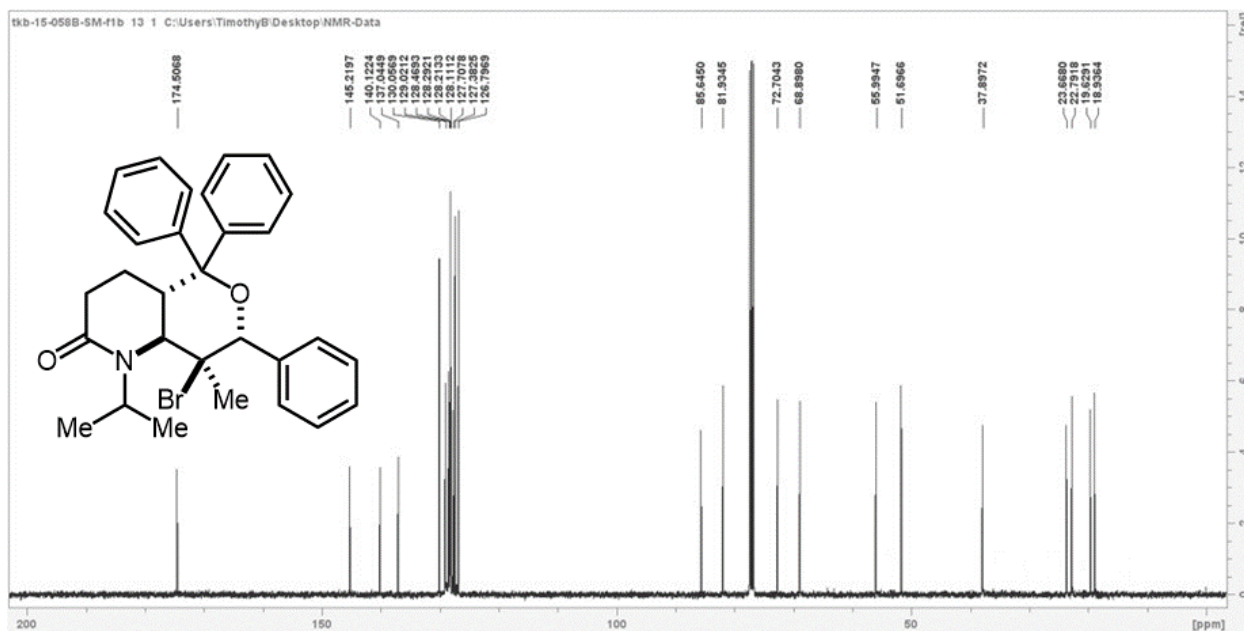

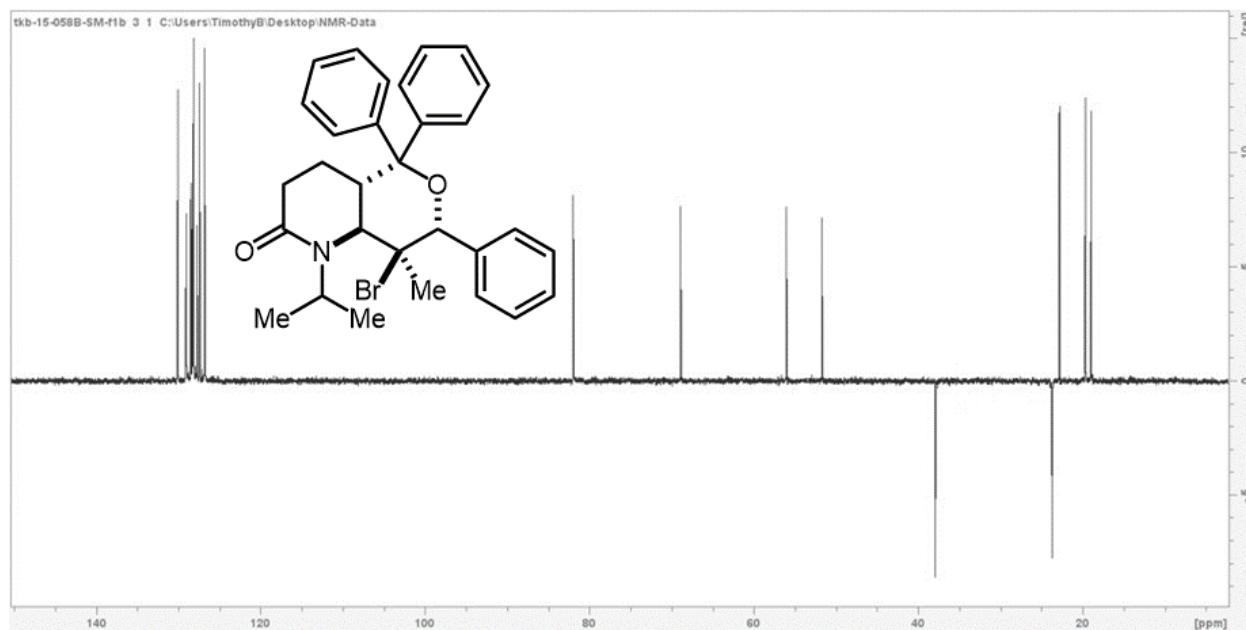

### Compound 5l

Prepared in 1.0 mmol scale using **General Procedure A**. Purification: Flash chromatography on silica eluting with hexane/acetone (90:10 to 50:50). Amorphous solid. Yield = 540.4 mg, 80%, 95:5 dr (*anti:syn*).  $^1\text{H}$  NMR (400 MHz,  $\text{CDCl}_3$ )  $\delta$  7.58 – 7.50 (m, 2H), 7.45 – 7.14 (m, 15H), 6.90 (d,  $J$  = 8.4 Hz, 1H), 5.70 (d,  $J$  = 15.4 Hz, 1H), 5.20 (d,  $J$  = 15.4 Hz, 1H), 4.87 (s, 1H), 4.51 (d,  $J$  = 11.5 Hz, 1H), 3.97 (s, 3H), 2.71 – 2.54 (m, 2H), 2.17 (ddd,  $J$  = 17.4, 12.9, 4.8 Hz, 1H), 2.01 – 1.84 (m, 1H), 1.91 (s, 3H), 1.59 – 1.57 (m, 2H).  $^{13}\text{C}$  NMR (101 MHz,  $\text{CDCl}_3$ )  $\delta$  174.21, 145.23, 139.69, 136.72, 132.65, 131.44, 130.08, 129.29, 128.81, 128.40, 128.31, 128.10, 128.07, 127.74, 127.36, 126.90, 111.87, 85.48, 81.61, 72.93, 64.17, 56.31, 51.41, 47.01, 36.40, 22.68, 19.62. **HRMS-EI**<sup>+</sup> ( $m/z$ ): calc for  $\text{C}_{36}\text{H}_{35}\text{Br}_2\text{NO}_3$   $[\text{M}]^+$  687.0984, found 687.0988.

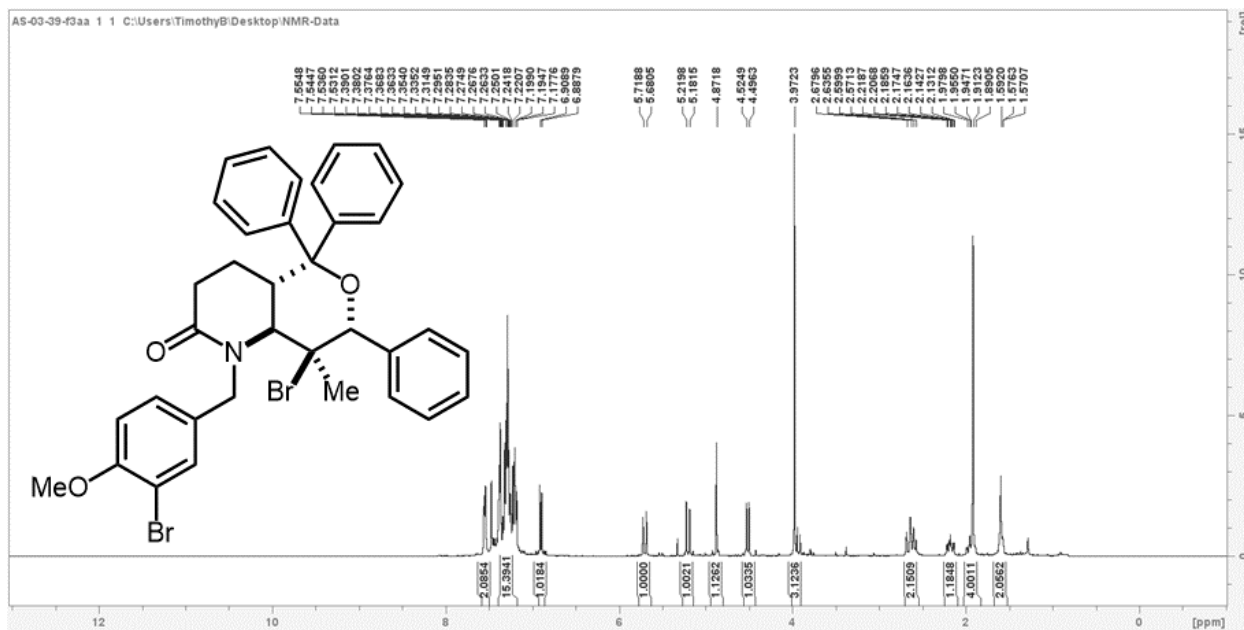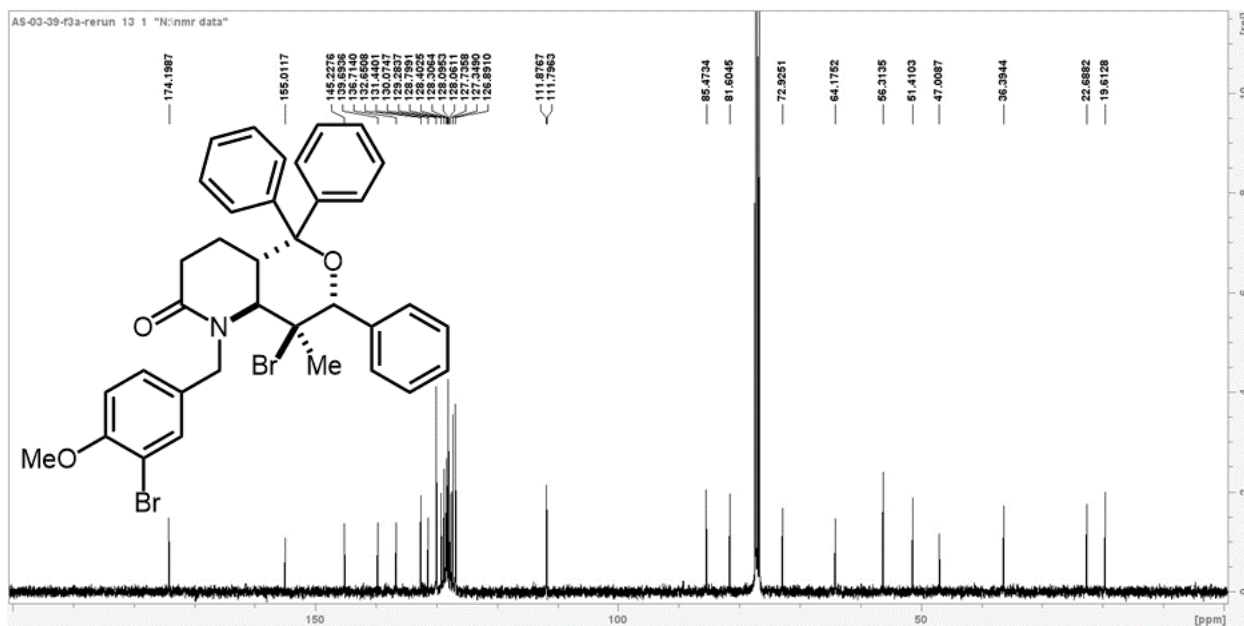

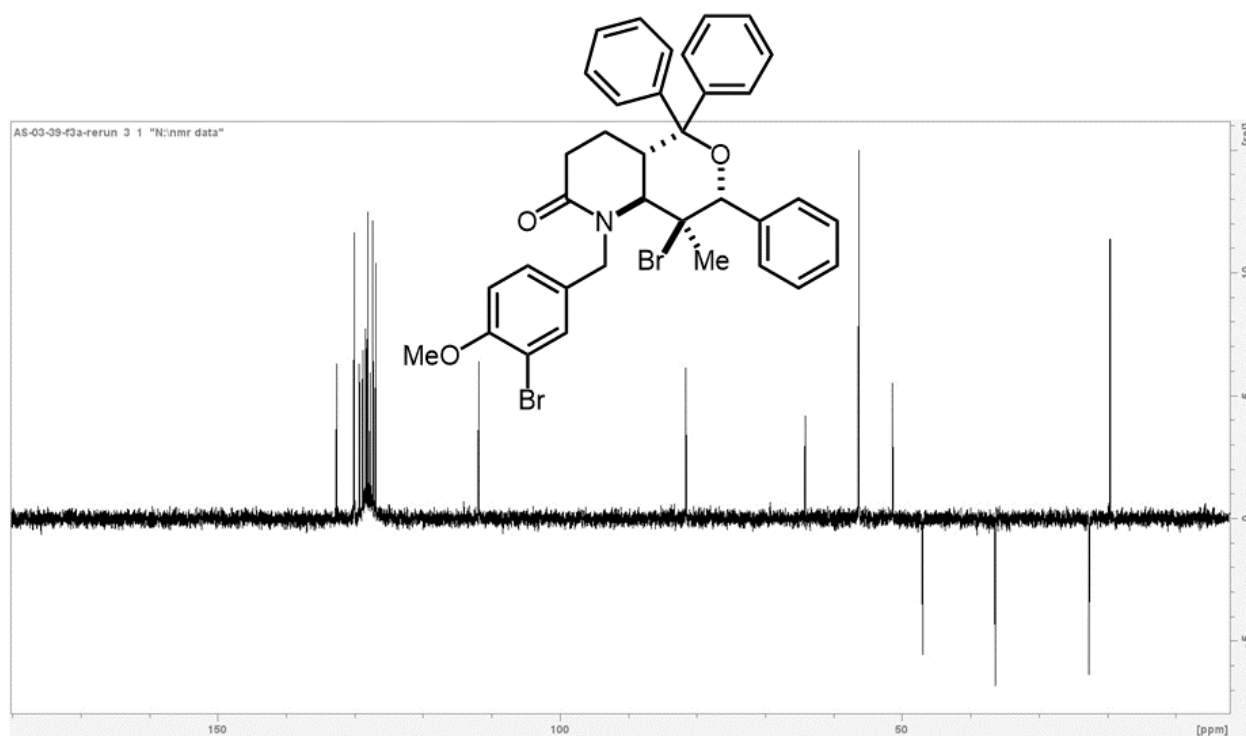

### Compound 5m

Prepared in 1.0 mmol scale using **General Procedure A**. Purification: Flash chromatography on silica eluting with hexane/acetone (90:10 to 70:30). Amorphous solid. Yield = 347.0 mg, 88%, 95:5 dr (*anti:syn*).  $^1\text{H}$  NMR (400 MHz,  $\text{CDCl}_3$ )  $\delta$  7.57 – 7.46 (m, 2H), 7.40 – 7.27 (m, 3H), 5.03 (s, 1H), 4.53 (hept,  $J = 6.6$  Hz, 1H), 3.95 (d,  $J = 11.1$  Hz, 1H), 2.50 (ddd,  $J = 17.5, 4.3, 2.8$  Hz, 1H), 2.31 (ddd,  $J = 17.7, 12.7, 5.3$  Hz, 1H), 1.93 – 1.65 (m, 2H), 1.60 (dd,  $J = 6.8, 4.5$  Hz, 6H), 1.40 – 1.31 (m, 9H).  $^{13}\text{C}$  NMR (101 MHz,  $\text{CDCl}_3$ )  $\delta$  174.70, 137.36, 130.19, 128.18, 127.21, 80.90, 75.72, 72.35, 68.57, 53.89, 48.21, 36.44, 29.53, 22.85, 22.03, 19.03, 18.93, 17.67. **HRMS-EI<sup>+</sup>** ( $m/z$ ): calc for  $\text{C}_{20}\text{H}_{28}\text{BrNO}_2$  [ $\text{M}$ ]<sup>+</sup> 393.1303, found 393.1306.



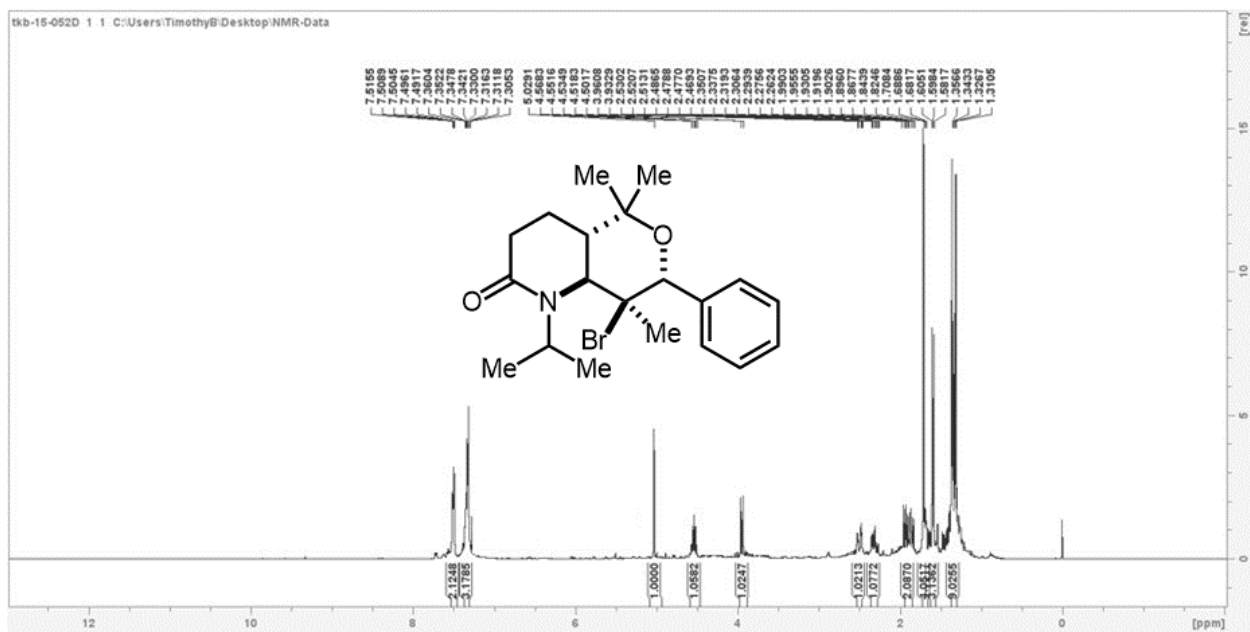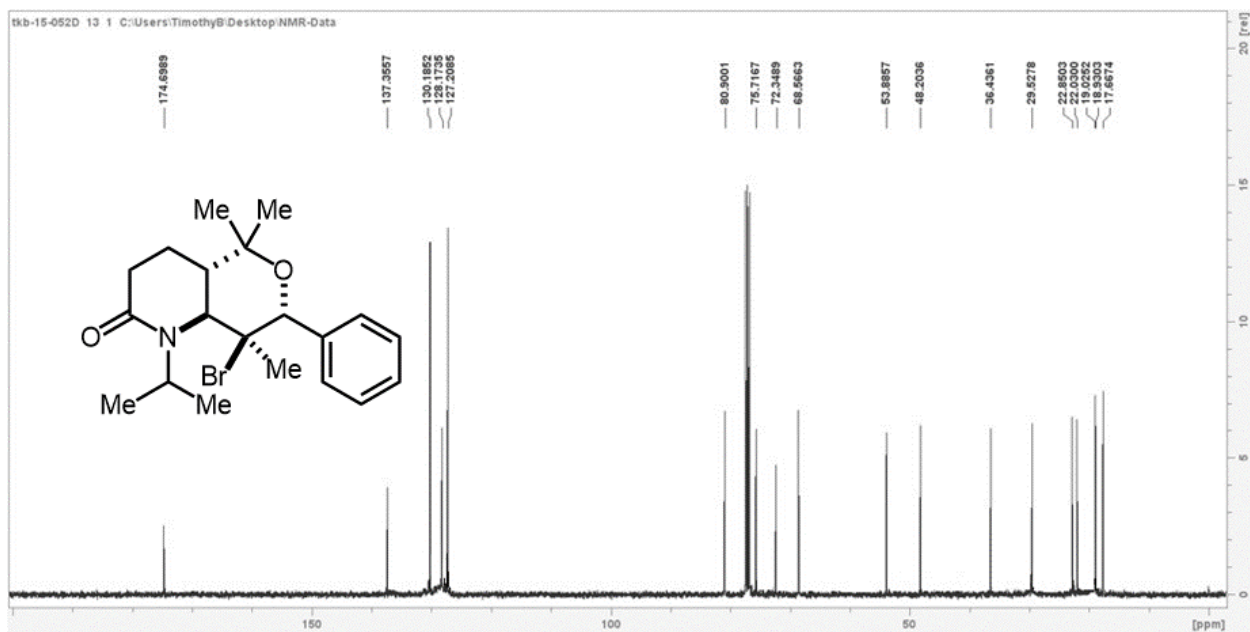

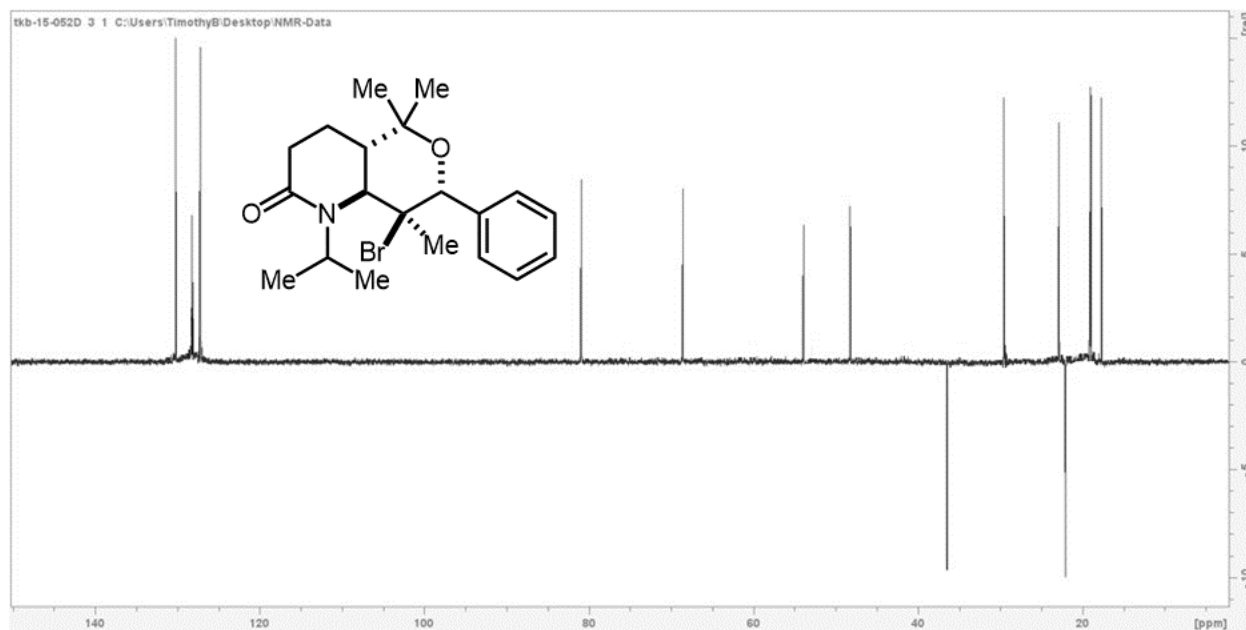

### Compound 5n

Prepared in 1.0 mmol scale using **General Procedure A**. Purification: Flash chromatography on silica eluting with hexane/acetone (90:10 to 70:30). Amorphous solid. Yield = 357.3 mg, 85%, 95:5 dr (*anti:syn*).  $^1\text{H}$  NMR (400 MHz,  $\text{CDCl}_3$ )  $\delta$  7.56 – 7.46 (m, 2H), 7.38 – 7.22 (m, 3H), 5.06 (s, 1H), 4.78 – 4.65 (m, 1H), 4.06 (d,  $J = 11.1$  Hz, 1H), 2.50 (ddd,  $J = 17.6, 4.7, 2.9$  Hz, 1H), 2.41 – 2.17 (m, 2H), 2.07 – 1.80 (m, 3H), 1.84 – 1.59 (m, 2H), 1.68 (s, 3H), 1.53 – 1.35 (m, 2H), 1.34 (d,  $J = 14.9$  Hz, 7H).  $^{13}\text{C}$  NMR (101 MHz,  $\text{CDCl}_3$ )  $\delta$  173.71, 137.34, 130.24, 128.17, 127.22, 80.84, 75.63, 72.68, 68.68, 61.80, 48.33, 36.32, 30.81, 29.48, 28.34, 25.85, 25.42, 21.87, 18.90, 17.71. **HRMS-EI<sup>+</sup>** ( $m/z$ ): calc for  $\text{C}_{22}\text{H}_{30}\text{BrNO}_2$   $[\text{M}]^+$  419.1460, found 419.1466.

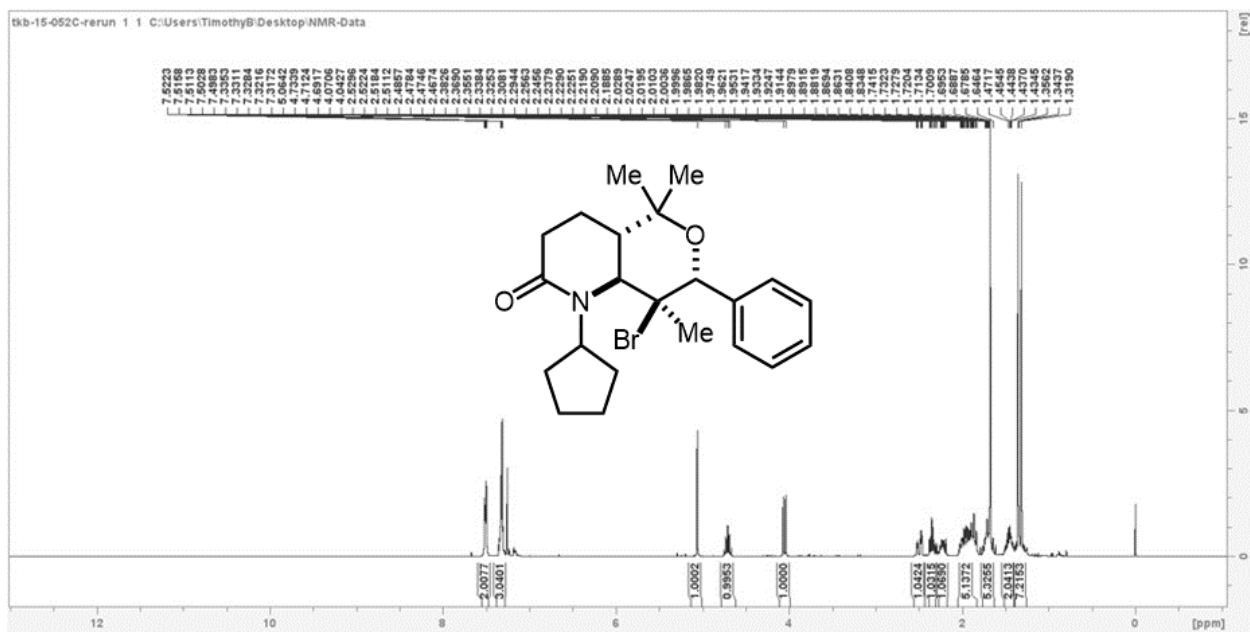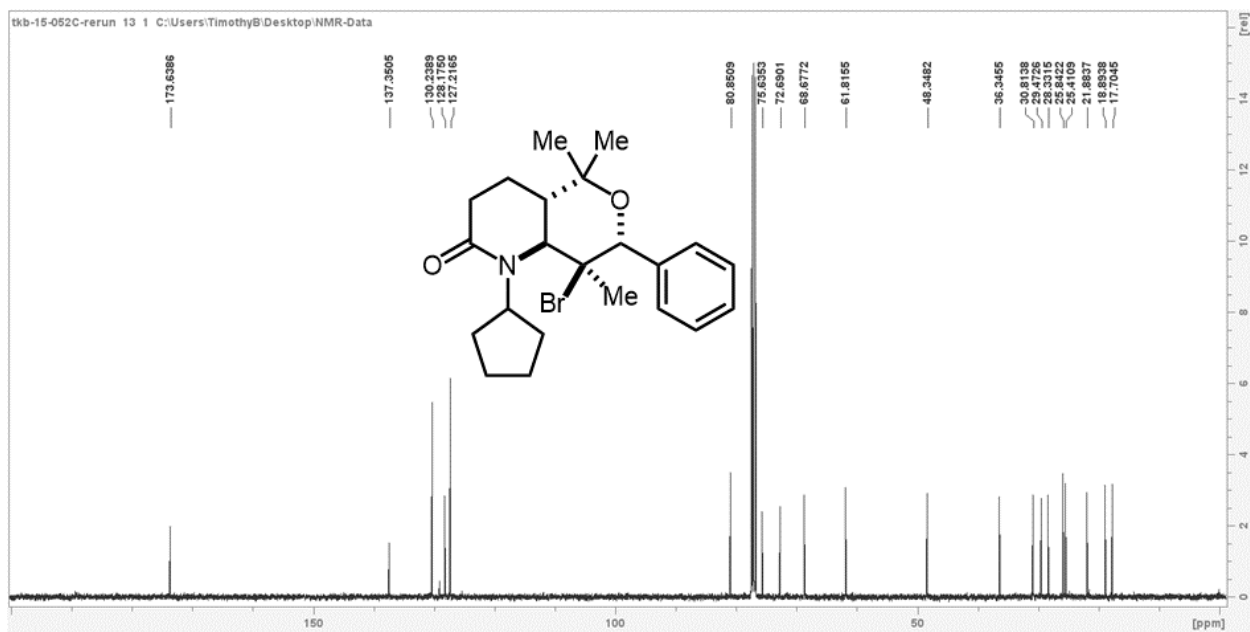

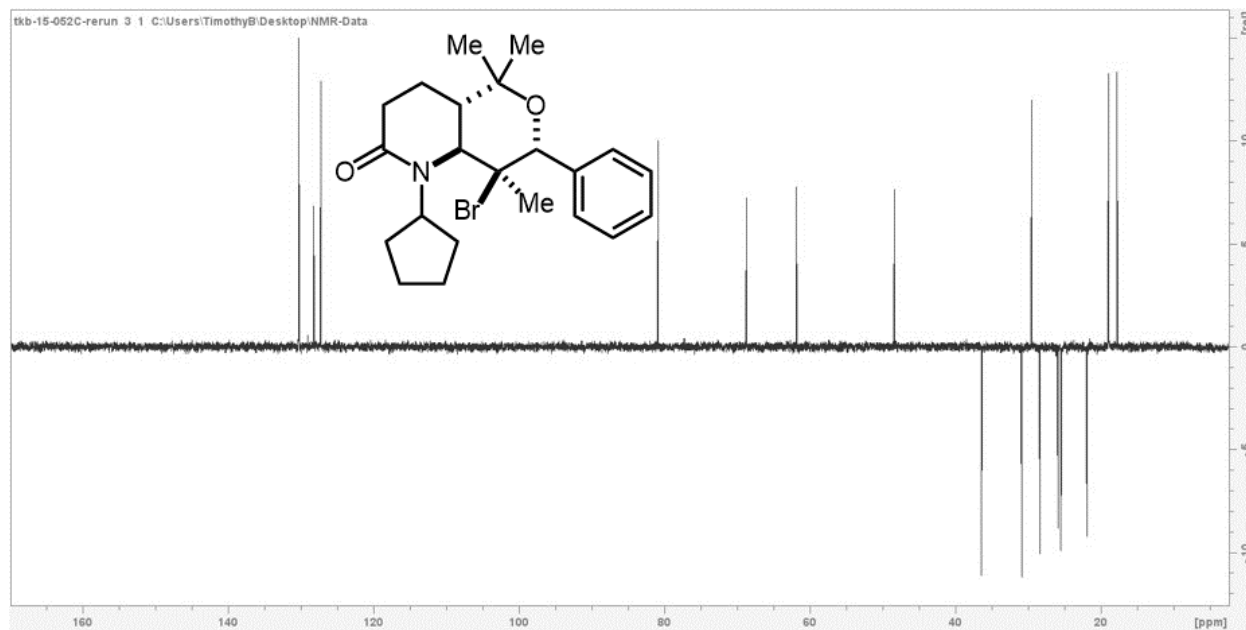

### Compound 5b

Prepared in 1.0 mmol scale using **General Procedure A**. Purification: Flash chromatography on silica eluting with hexane/acetone (90:10 to 50:50). Yellowish oil. Yield = 357.3 mg, 89%, 95:5 dr (*anti:syn*).

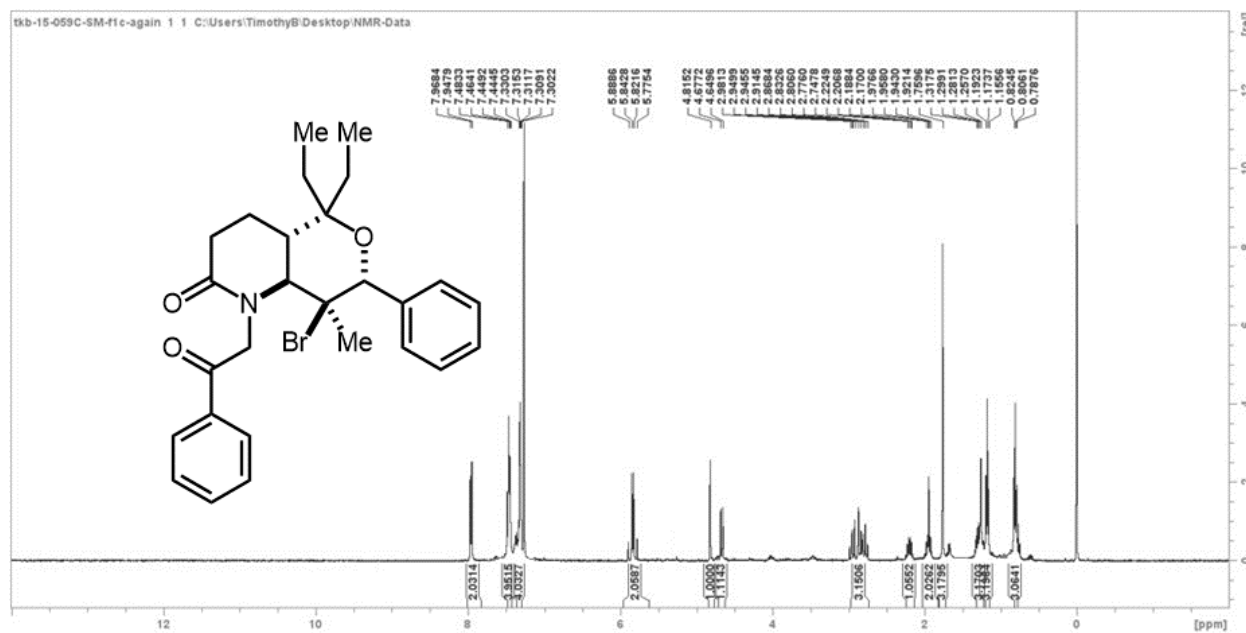

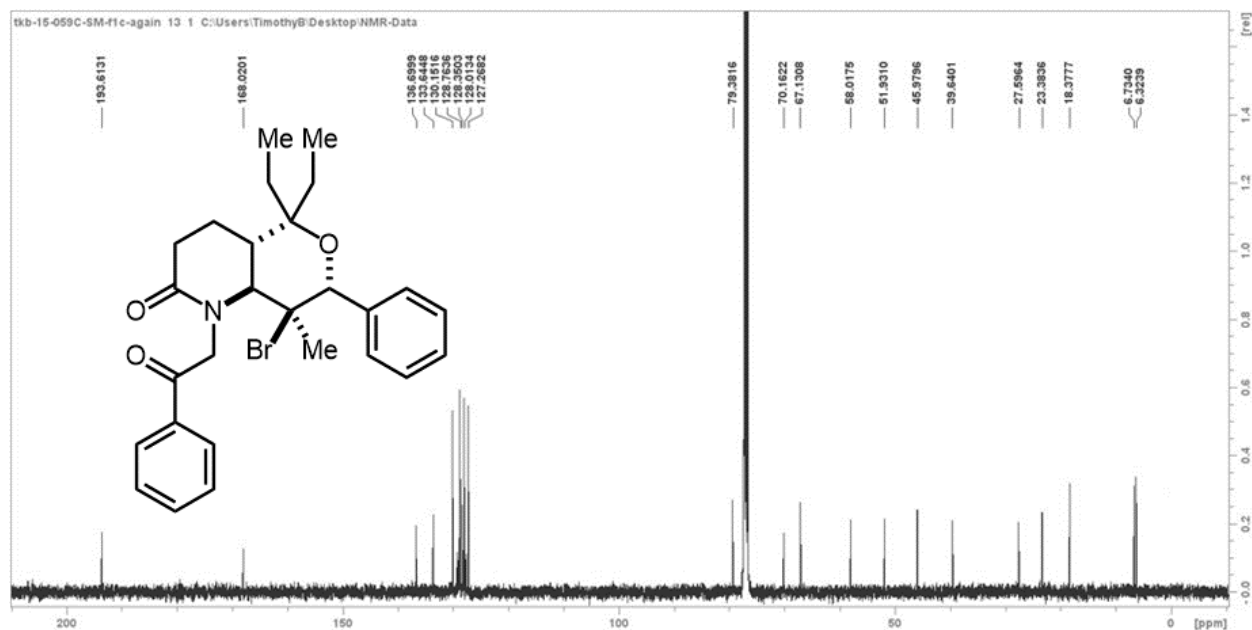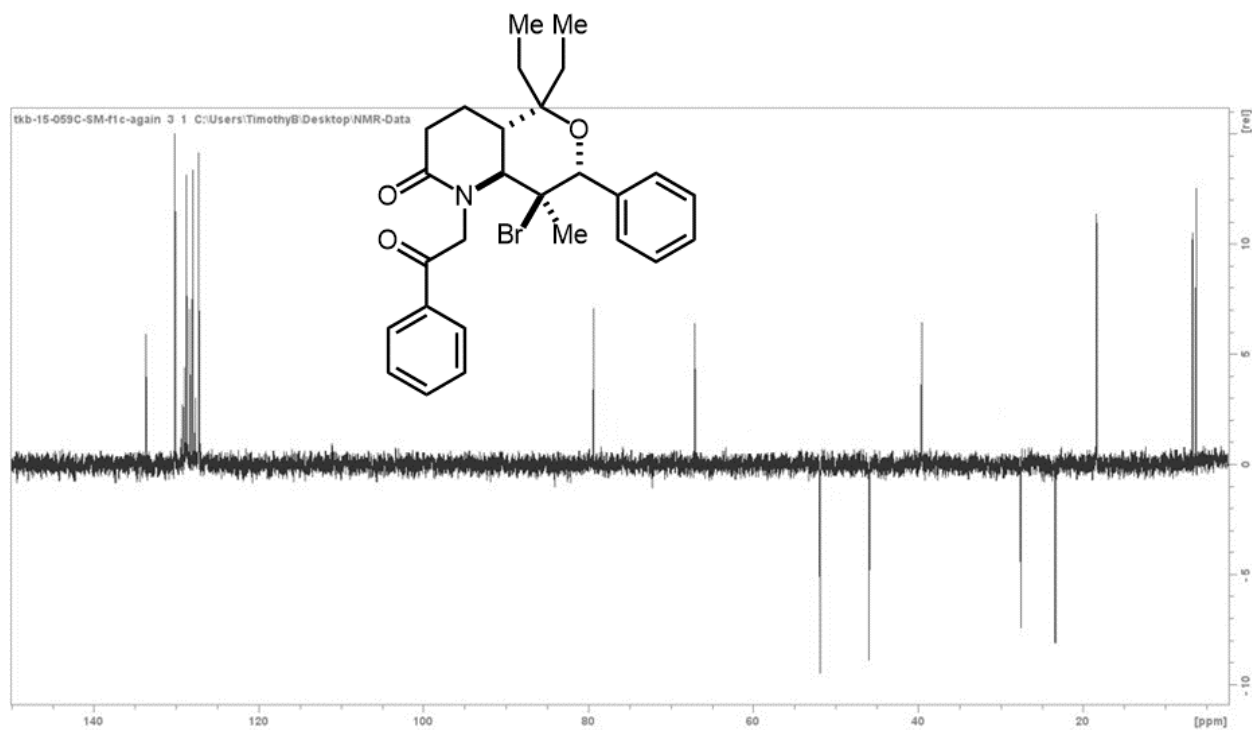

### Compound 5p

Prepared in 1.0 mmol scale using **General Procedure A**. Purification: Flash chromatography on silica eluting with hexane/acetone (90:10 to 50:50). Amorphous solid. Yield = 492.5 mg, 92%, 95:5 dr (*anti:syn*). <sup>1</sup>H NMR (400 MHz, CDCl<sub>3</sub>) δ 7.54 – 7.51 (m, 2H), 7.33 – 7.22 (m, 7H), 5.10

(s, 1H), 4.42 (ddd,  $J = 13.8, 10.5, 5.7$  Hz, 1H), 4.21 (ddd,  $J = 13.9, 10.1, 5.1$  Hz, 1H), 4.11 (d,  $J = 10.9$  Hz, 1H), 3.10 (ddd,  $J = 12.7, 10.4, 5.1$  Hz, 1H), 2.85 (ddd,  $J = 12.7, 10.1, 5.7$  Hz, 1H), 2.56 (ddd,  $J = 17.8, 5.0, 1.9$  Hz, 1H), 2.42 (ddd,  $J = 18.1, 13.2, 6.0$  Hz, 1H), 1.88 – 1.65 (m, 2H), 1.64 (s, 3H), 1.35 (s, 3H), 1.34 – 1.22 (m, 4H).  $^{13}\text{C}$  NMR (101 MHz,  $\text{CDCl}_3$ )  $\delta$  172.66, 137.73, 137.17, 132.00, 130.53, 130.35, 128.45, 128.25, 127.24, 80.39, 75.24, 72.35, 66.55, 47.98, 45.36, 34.28, 32.94, 29.25, 22.31, 18.39, 18.01. **HRMS- $\text{EI}^+$**  ( $m/z$ ): calc for  $\text{C}_{25}\text{H}_{29}\text{Br}_2\text{NO}_2$  [ $\text{M}$ ] $^+$  533.0565, found 533.0569.

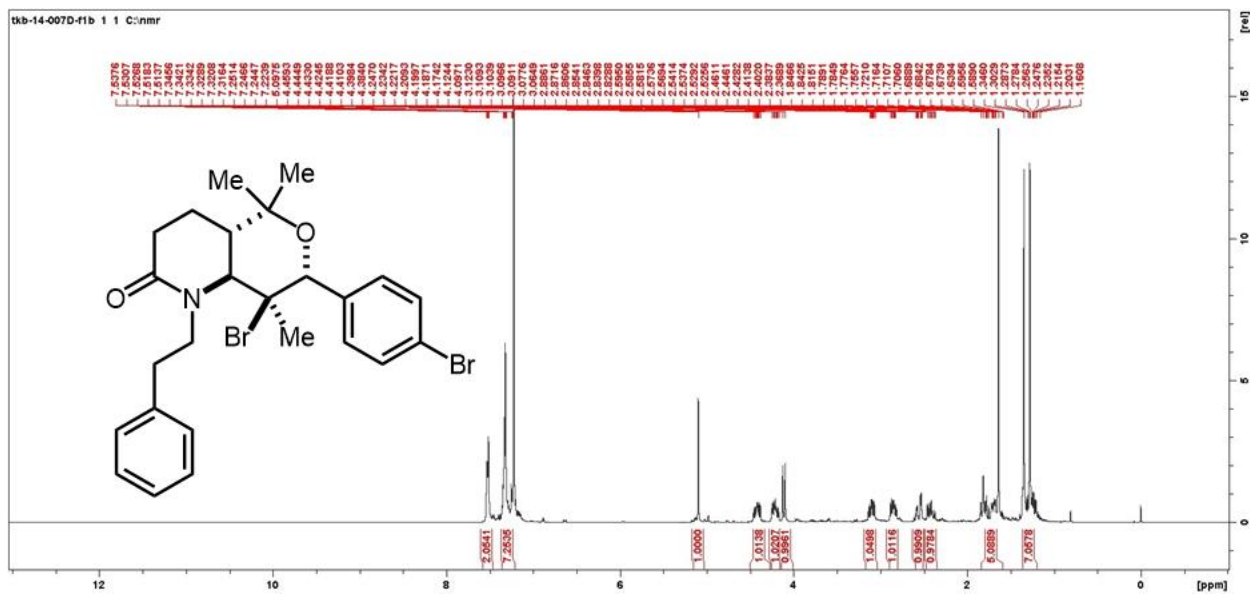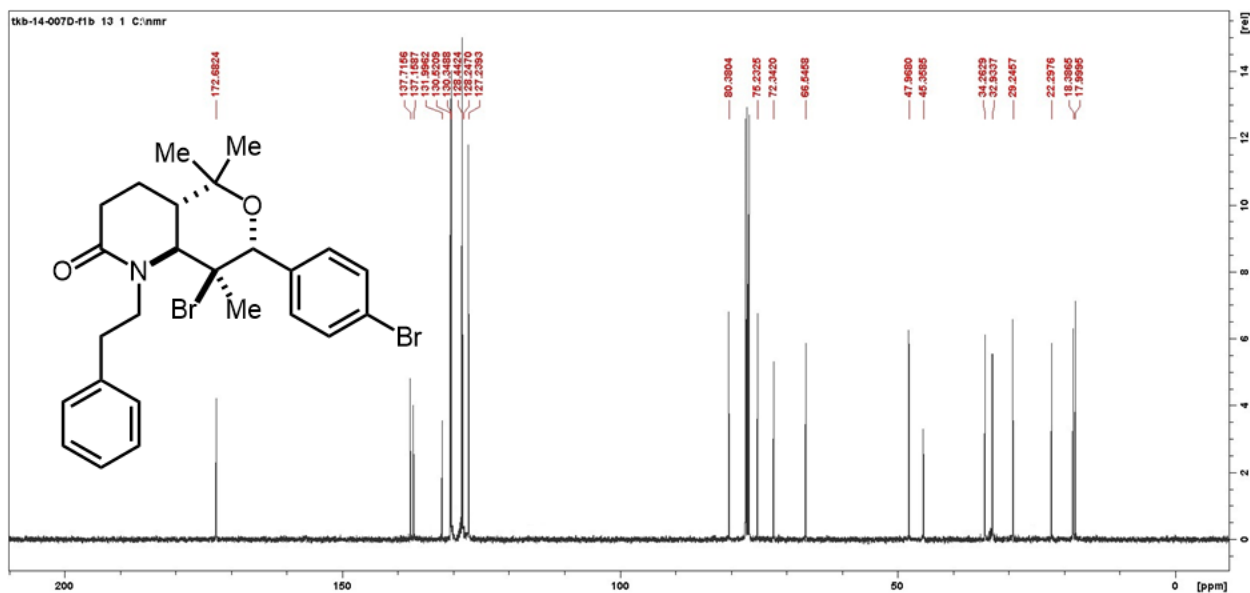

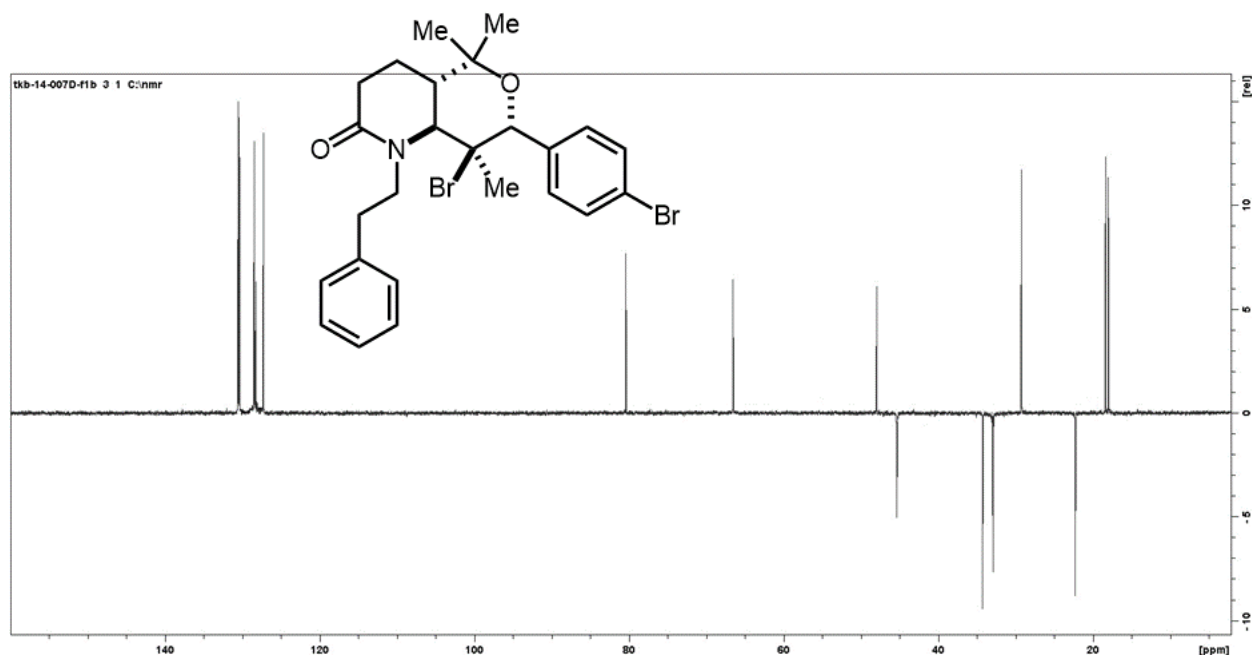

### Compound 5q

Prepared in 1.0 mmol scale using **General Procedure A**. Purification: Flash chromatography on silica eluting with hexane/acetone (90:10 to 50:50). Amorphous solid. Yield = 453.5 mg, 87%, 95:5 dr (*anti:syn*).  $^1\text{H}$  NMR (400 MHz,  $\text{CDCl}_3$ )  $\delta$  7.52 – 7.41 (m, 2H), 7.41 – 7.20 (m, 5H), 7.14 – 7.01 (m, 2H), 5.64 (d,  $J = 16.5$  Hz, 1H), 5.25 (d,  $J = 16.5$  Hz, 1H), 4.99 (s, 1H), 4.13 (d,  $J = 11.0$  Hz, 1H), 2.76 (ddd,  $J = 17.8, 4.9, 2.0$  Hz, 1H), 2.55 (ddd,  $J = 18.2, 13.2, 6.0$  Hz, 1H), 1.93 (td,  $J = 11.6, 2.1$  Hz, 1H), 1.82 (ddt,  $J = 10.3, 6.0, 2.0$  Hz, 1H), 1.66 (s, 3H), 1.51 – 1.43 (m, 1H), 1.37 (s, 3H), 1.25 (s, 3H).  $^{13}\text{C}$  NMR (101 MHz,  $\text{CDCl}_3$ )  $\delta$  173.06, 137.06, 136.26, 132.23, 130.32, 128.97, 128.81, 128.54, 128.48, 128.23, 127.22, 80.31, 75.25, 71.37, 66.27, 48.07, 45.98, 34.24, 29.30, 22.19, 18.47, 18.05. **HRMS-EI $^+$**  ( $m/z$ ): calc for  $\text{C}_{24}\text{H}_{27}\text{Br}_2\text{NO}_2$   $[\text{M}]^+$  519.0409, found 519.0403.





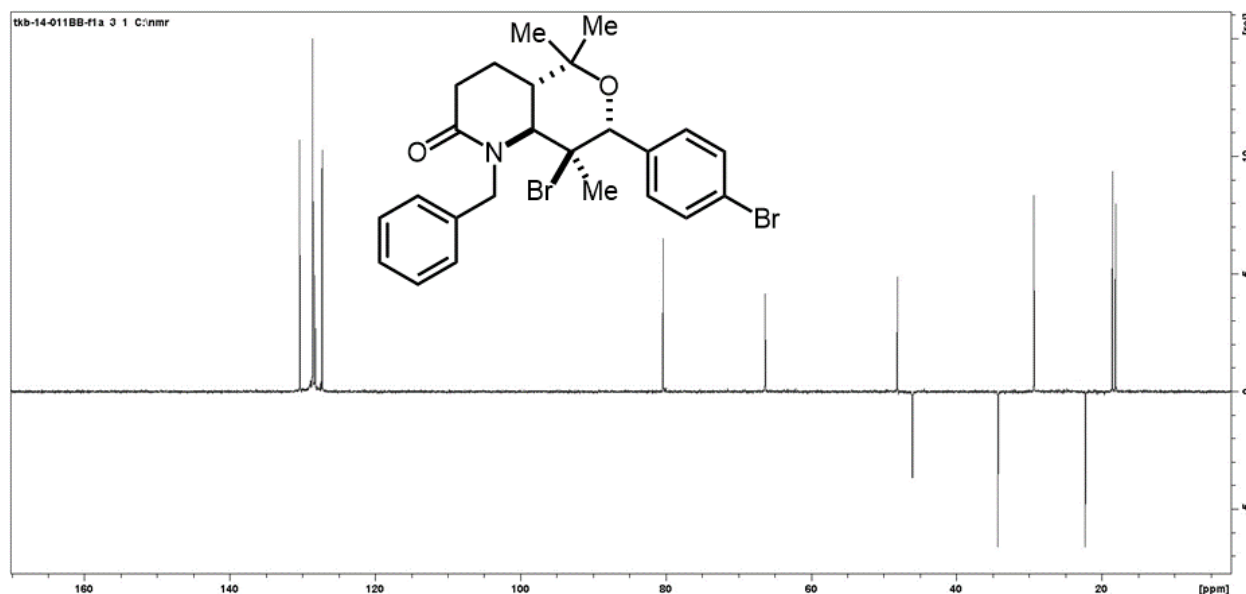

### Compound 5r

Prepared in 1.0 mmol scale using **General Procedure A**. Purification: Flash chromatography on silica eluting with hexane/acetone (90:10 to 50:50). Amorphous solid. Yield = 312.7 mg, 73%, 95:5 dr (*anti:syn*). <sup>1</sup>H NMR (400 MHz, CDCl<sub>3</sub>) δ 7.54 (dp, *J* = 6.9, 2.2 Hz, 2H), 7.47 – 7.22 (m, 7H), 7.26 – 7.17 (m, 1H), 4.84 (s, 1H), 4.55 – 4.35 (m, 1H), 4.22 (ddd, *J* = 13.8, 10.6, 4.9 Hz, 1H), 4.13 – 3.95 (m, 2H), 3.53 (t, *J* = 11.4 Hz, 1H), 3.20 – 3.09 (m, 1H), 2.95 – 2.83 (m, 1H), 2.69 – 2.46 (m, 2H), 2.12 (tddd, *J* = 12.6, 10.8, 4.5, 2.5 Hz, 1H), 1.73 (s, 3H), 1.72 – 1.58 (m, 1H), 1.48 – 1.26 (m, 1H). <sup>13</sup>C NMR (101 MHz, CDCl<sub>3</sub>) δ 172.14, 139.21, 136.68, 130.19, 129.18, 128.41, 128.37, 127.36, 126.24, 88.00, 71.71, 69.99, 69.85, 44.49, 39.42, 33.31, 33.11, 22.08, 18.50. **HRMS-EI<sup>+</sup>** (*m/z*): calc for C<sub>23</sub>H<sub>26</sub>BrNO<sub>2</sub> [M]<sup>+</sup> 427.1147, found 427.1133.



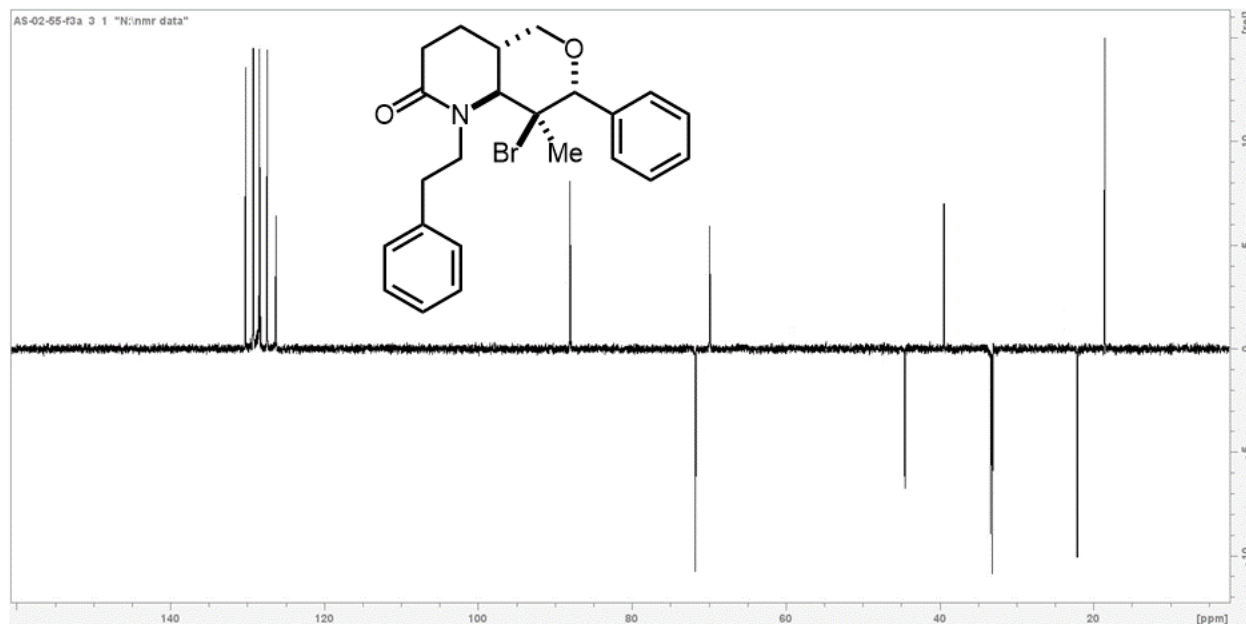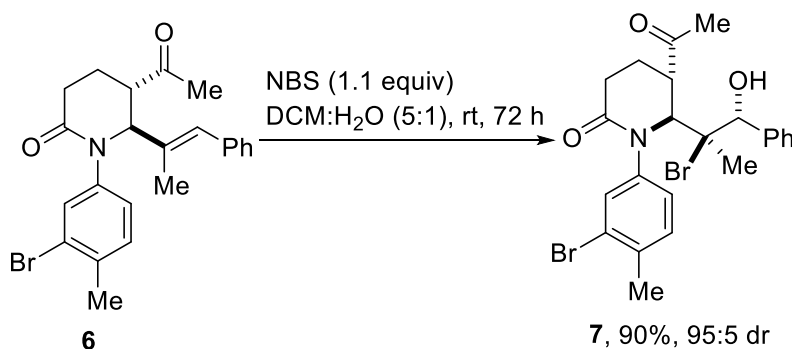

### Compound 7

Prepared from **6** (213.2 mg, 0.5 mmol) using **General Procedure A**. Purification: Flash chromatography on silica eluting with hexane/acetone (90:10 to 50:50). Amorphous solid. Yield = 235.5 mg, 90%, 95:5 dr (*anti:syn*).  $^1\text{H NMR}$  (400 MHz,  $\text{CDCl}_3$ )  $\delta$  7.50 (d,  $J = 8.4$  Hz, 1H), 7.38 – 7.32 (m, 4H), 7.05 (dd,  $J = 8.4, 2.1$  Hz, 1H), 6.57 (s, 1H), 4.99 (d,  $J = 7.6$  Hz, 1H), 4.93 (s, 1H), 3.31 (ddd,  $J = 13.4, 7.7, 4.2$  Hz, 1H), 2.85 (ddd,  $J = 17.9, 3.6, 2.6$  Hz, 1H), 2.53 – 2.43 (m, 4H), 2.28 – 2.17 (m, 4H), 1.80 – 1.58 (m, 1H), 1.58 – 1.38 (m, 1H), 1.44 (s, 3H).  $^{13}\text{C NMR}$  (101 MHz,  $\text{CDCl}_3$ )  $\delta$  206.75, 170.76, 139.26, 135.41, 135.22, 130.56, 130.33, 127.78, 127.62, 124.97, 70.91, 64.73, 60.80, 50.99, 32.86, 28.76, 23.89, 21.56, 20.91. **HRMS-EI<sup>+</sup>** ( $m/z$ ): calc for  $\text{C}_{23}\text{H}_{25}\text{Br}_2\text{NO}_3$   $[\text{M}]^+$  521.0201, found 521.0207.

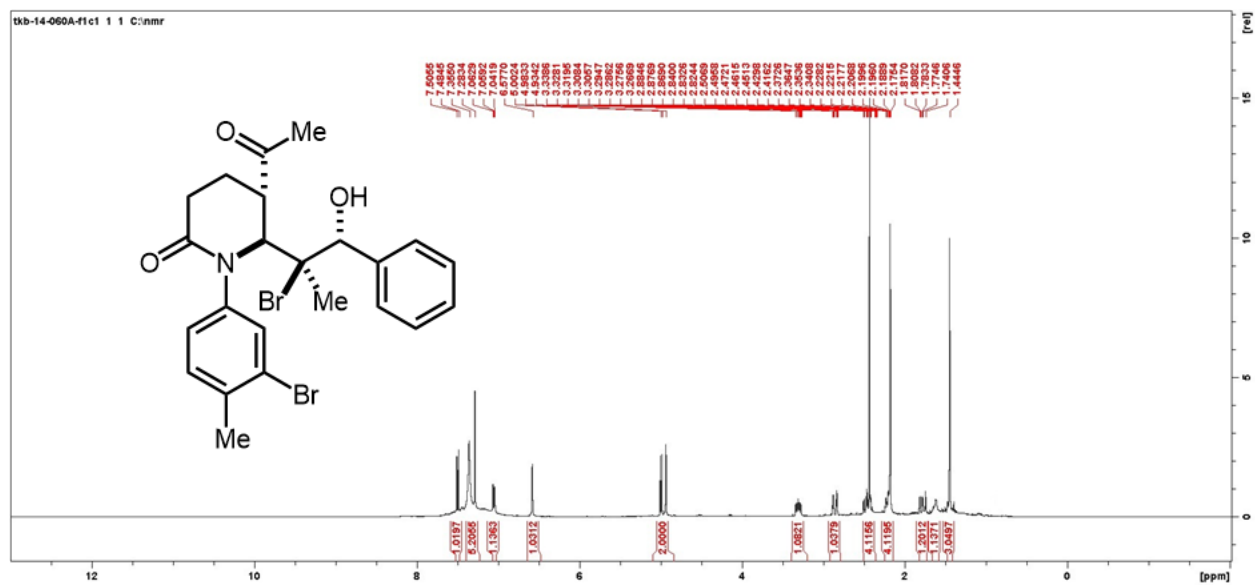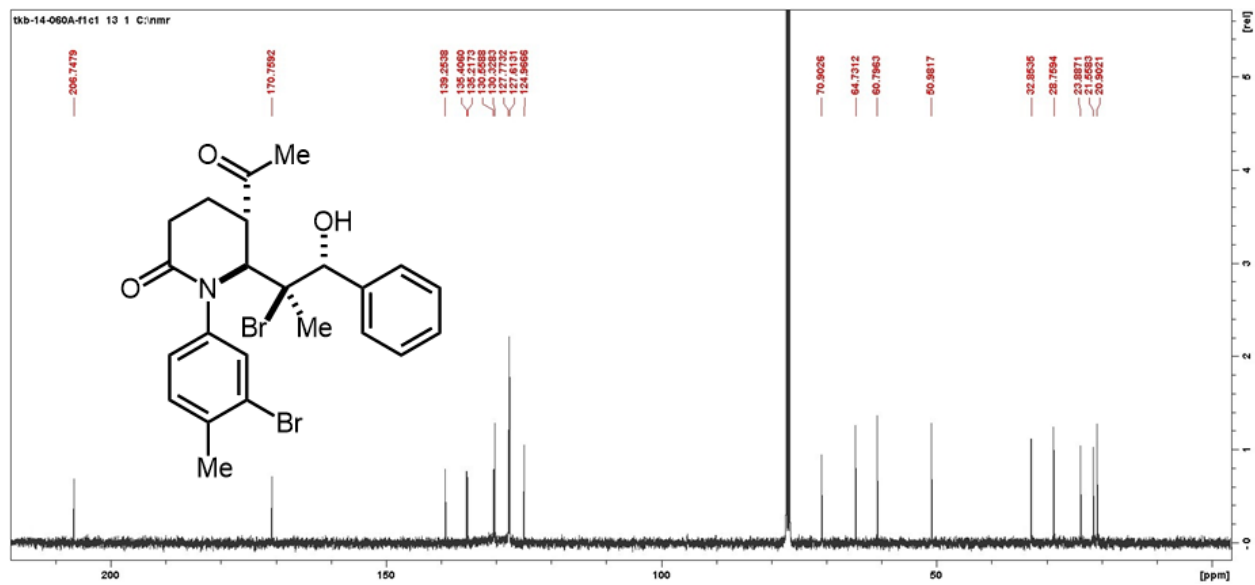

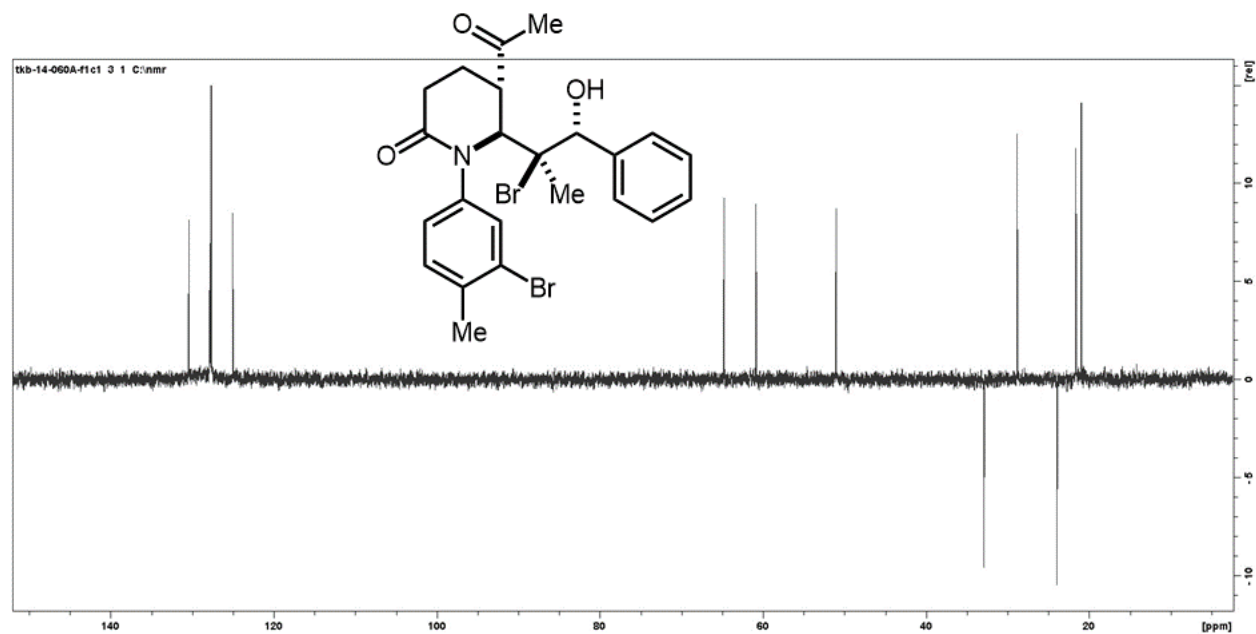

## References

- 1 H. Braunstein, S. Langevin, M. Khim, J. Adamson, K. Hovenkotter, L. Kotlarz, B. Mansker and T. K. Beng, *Org. Biomol. Chem.*, 2016, **14**, 8864-8872.
- 2 K. Hovenkotter, H. Braunstein, S. Langevin and T. K. Beng, *Org. Biomol. Chem.*, 2017, **15**, 1217-1221.
